# Supplementary material for: Patients’ preferences for health insurance coverage of new technologies for treating chronic diseases in China: a discrete choice experiment
Source: PubMed Central journal article supplement — BMJ Open. 2020 Sep 23;10(9):e038051. doi: 10.1136/bmjopen-2020-038051 (PMC7513632; doi:10.1136/bmjopen-2020-038051), 2020-09-23
Supplement: bmjopen-2020-038051.draft_revisions.pdf [file bmjopen-2020-038051.draft_revisions.pdf]

# BMJ Open

BMJ Open is committed to open peer review. As part of this commitment we make the peer review history of every article we publish publicly available.

When an article is published we post the peer reviewers' comments and the authors' responses online. We also post the versions of the paper that were used during peer review. These are the versions that the peer review comments apply to.

The versions of the paper that follow are the versions that were submitted during the peer review process. They are not the versions of record or the final published versions. They should not be cited or distributed as the published version of this manuscript.

BMJ Open is an open access journal and the full, final, typeset and author-corrected version of record of the manuscript is available on our site with no access controls, subscription charges or pay-per-view fees (<http://bmjopen.bmj.com>).

If you have any questions on BMJ Open's open peer review process please email [info.bmjopen@bmj.com](mailto:info.bmjopen@bmj.com)

# BMJ Open

## Patients' preferences for health insurance coverage of new technologies for treating chronic diseases in China: a discrete choice experiment

|                               |                                                                                                                                                                                                                                                                                                                                                                                                                                                                                                                                                                                                                                                          |
|-------------------------------|----------------------------------------------------------------------------------------------------------------------------------------------------------------------------------------------------------------------------------------------------------------------------------------------------------------------------------------------------------------------------------------------------------------------------------------------------------------------------------------------------------------------------------------------------------------------------------------------------------------------------------------------------------|
| Journal:                      | <i>BMJ Open</i>                                                                                                                                                                                                                                                                                                                                                                                                                                                                                                                                                                                                                                          |
| Manuscript ID                 | bmjopen-2020-038051                                                                                                                                                                                                                                                                                                                                                                                                                                                                                                                                                                                                                                      |
| Article Type:                 | Original research                                                                                                                                                                                                                                                                                                                                                                                                                                                                                                                                                                                                                                        |
| Date Submitted by the Author: | 27-Feb-2020                                                                                                                                                                                                                                                                                                                                                                                                                                                                                                                                                                                                                                              |
| Complete List of Authors:     | Geng, JinSong; Nantong University Medical School, Department of Medical Informatics<br>Chen, Xiaowei; Nantong University Medical School, Department of Medical Informatics; Zhejiang University School of Medicine First Affiliated Hospital, Library and Reference Department<br>Bao, Haini; Nantong University Medical School, Department of Medical Informatics<br>Qian, Danmin; Nantong University Medical School, Department of Medical Informatics<br>Shao, Yuting; Tongji University School of Medicine, Department of Ophthalmology<br>Yu, Hao; Harvard Medical School, Department of Population Medicine; Harvard Pilgrim Health Care Institute |
| Keywords:                     | Health policy < HEALTH SERVICES ADMINISTRATION & MANAGEMENT, International health services < HEALTH SERVICES ADMINISTRATION & MANAGEMENT, Health & safety < HEALTH SERVICES ADMINISTRATION & MANAGEMENT                                                                                                                                                                                                                                                                                                                                                                                                                                                  |
|                               |                                                                                                                                                                                                                                                                                                                                                                                                                                                                                                                                                                                                                                                          |

SCHOLARONE™  
Manuscripts

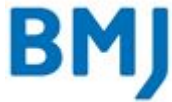

I, the Submitting Author has the right to grant and does grant on behalf of all authors of the Work (as defined in the below author licence), an exclusive licence and/or a non-exclusive licence for contributions from authors who are: i) UK Crown employees; ii) where BMJ has agreed a CC-BY licence shall apply, and/or iii) in accordance with the terms applicable for US Federal Government officers or employees acting as part of their official duties; on a worldwide, perpetual, irrevocable, royalty-free basis to BMJ Publishing Group Ltd ("BMJ") its licensees and where the relevant Journal is co-owned by BMJ to the co-owners of the Journal, to publish the Work in this journal and any other BMJ products and to exploit all rights, as set out in our [licence](#).

The Submitting Author accepts and understands that any supply made under these terms is made by BMJ to the Submitting Author unless you are acting as an employee on behalf of your employer or a postgraduate student of an affiliated institution which is paying any applicable article publishing charge ("APC") for Open Access articles. Where the Submitting Author wishes to make the Work available on an Open Access basis (and intends to pay the relevant APC), the terms of reuse of such Open Access shall be governed by a Creative Commons licence – details of these licences and which [Creative Commons](#) licence will apply to this Work are set out in our licence referred to above.

Other than as permitted in any relevant BMJ Author's Self Archiving Policies, I confirm this Work has not been accepted for publication elsewhere, is not being considered for publication elsewhere and does not duplicate material already published. I confirm all authors consent to publication of this Work and authorise the granting of this licence.

# Patients' preferences for health insurance coverage of new technologies for treating chronic diseases in China: a discrete choice experiment

Jinsong Geng<sup>1\*</sup>, Xiaowei Chen<sup>1,2</sup>, Haini Bao<sup>1</sup>, Danmin Qian<sup>1</sup>, Yuting Shao<sup>3</sup>, Hao Yu<sup>4,5</sup>

<sup>1</sup>Department of Medical Informatics, Nantong University Medical School, Nantong, China

<sup>2</sup>Library and Reference Department, Zhejiang University School of Medicine First Affiliated Hospital, Hangzhou, China

<sup>3</sup>Department of Ophthalmology, Tongji University School of Medicine, Shanghai, China

<sup>4</sup>Department of Population Medicine, Harvard Medical School, Boston, USA

<sup>5</sup>Harvard Pilgrim Health Care Institute, Boston, USA

\*Correspondence: Jinsong Geng, Department of Medical Informatics, Nantong University Medical School, 19 Qixiu Road, Nantong 226001, China; Email [gjs@ntu.edu.cn](mailto:gjs@ntu.edu.cn); Tel: +86 513 85051891; Fax: +86 513 85051876

**Word count: 4055**

## ABSTRACT

### Objectives

Our study aimed to inform insurance decision-making in China by investigating patients' preferences for insurance coverage of new technologies for treating chronic diseases.

### Design

We identified six attributes of new medical technologies for treating chronic diseases and used Bayesian-efficient design to generate choice sets for a discrete choice experiment (DCE). After conducting the DCE, we analyzed the data by estimating conditional logistic regressions to examine patient-reported preference for each attribute.

### Setting

The DCE was conducted with patients in six tertiary hospitals from four cities in Jiangsu Province.

### Participants

Patients aged 18 years or older with a history of diabetes or hypertension and taking medications regularly for more than one year were recruited (N=408).

### Results

The technology attributes regarding expected gains in health outcomes from the treatment ( $P<0.001$ ), high likelihood of effective treatment ( $P<0.001$ ), and low incidence of serious adverse events ( $P<0.001$ ) were significant, positive predictors of choice by the study patients. These results hold for the entire sample and for the subgroup analyses. Most of the study patients did not seem to care about whether there were alternative technologies currently covered by insurance ( $P>0.05$ ). Out-of-pocket costs were a significant, negative attribute for the entire study sample ( $\beta = -0.122$ ,  $P<0.001$ ) and for the patients with Urban and Rural Residents Basic Health Insurance (URRBMI) ( $\beta = -0.212$ ,  $P<0.001$ ), but not for all the patients with Urban Employees Basic Health Insurance (UEBMI) ( $\beta = -0.041$ ,  $P>0.05$ ).

## Conclusions

Patients valued most the health benefits and risks of new technologies, which were closely related to their own experiences and feelings. However, there existed heterogeneity in preferences between URRBMI and UEBMI patients. Further efforts should be made to reduce the gap between insurance schemes and make safe and cost-effective new technologies as priority for health insurance reimbursement.

**Keywords:** discrete choice experiment, patient preferences, chronic diseases, health insurance

## Strengths and limitations of this study

- This is the first study that provides evidence regarding patients' preferences for insurance coverage of new technologies for treating chronic diseases in China.
- It is also the first study that identified differential preferences among chronic disease patients with different types of insurance in China.
- Since our sample was from one wealthy province in China, future studies of nationally representative samples are needed.
- While this study focused on hypertension and diabetes, two of the most prevalent chronic diseases in China, future studies need to examine other types of chronic diseases.

## INTRODUCTION

Non-communicable chronic diseases (chronic diseases) are health conditions or diseases with long-term accumulation, non-self-healing, and difficult to cure. Nowadays, the prevalence and mortality of chronic diseases are on the rise around the world.<sup>1</sup> Chronic diseases present a particularly daunting challenge to China. It was estimated that among Chinese adults aged 35 to 75 years, nearly half had hypertension.<sup>2</sup> The overall prevalence of diabetes in Chinese adults was about 10.9%.<sup>3</sup> Furthermore, comorbidities are highly prevalent among patients with chronic diseases, which have a negative impact on the patient's quality of life and impede the efficacy of treatment.<sup>4-6</sup> Chronic diseases lead to heavy financial burden on patients' families and health insurance programs. It was estimated that the total economic burden associated with chronic diseases in China over the period 2010-2030 could be as high as US\$16 trillion (measured in 2010 US Dollars).<sup>7</sup> Further adding to the challenges to China's health insurance programs' financing capacity, new technologies for treating chronic diseases continue to enter the market, which can be very expensive and contribute to rising healthcare costs. Deciding on which new technology to cover and by which insurance program has become a key issue facing policy-makers in China in the context of universal health insurance coverage.

As part of its goal of providing timely, acceptable and affordable basic healthcare of appropriate quality to its residents, China successfully achieved universal health insurance coverage in 2011, increasing demand for and expenditures on healthcare. China's total health expenditures grew at an average annual rate of 12.2% in 2008-2017, much higher than its GDP's average annual growth rate (8.1%).<sup>8</sup> In recent years, Chinese policy-makers have struggled to keep a balance between expenditure control and meeting patients' demand for healthcare, including the demand for new technologies by patients with chronic diseases.

After China reached universal health insurance coverage, there were still considerable disparities in benefit coverage and reimbursement ratio among the three



1  
2  
3  
4  
5 major public insurance programs that together covered more than 95% of Chinese  
6  
7 people, including New Rural Cooperative Medical Scheme (NRCMS), Urban Residents  
8  
9 Basic Health insurance (URBMI), and Urban Employees Basic Health insurance  
10  
11 (UEBMI). For details of differences in health insurance eligibility, premiums and  
12  
13 benefits among the three programs, see the paper published by Yu.<sup>9</sup> Generally speaking,  
14  
15 UEBMI has the best benefit package and the lowest out-of-pocket costs among the three  
16  
17 public insurance programs,<sup>10 11</sup> and UEBMI enrollees had higher likelihood of  
18  
19 healthcare utilization.<sup>12</sup> To improve administrative efficiency and reduce inequality in  
20  
21 insurance benefits, China State Council issued the policy in January 2016 on merging  
22  
23 the NRCMS and URBMI to form the Urban Rural and Residents Basic Health  
24  
25 Insurance (URRBMI).<sup>13</sup> While the newly formed URRBMI helped equalize insurance  
26  
27 benefits between urban and rural residents, gaps remained between URRBMI and  
28  
29 UEBMI. Even among the UEBMI enrollees, insurance benefit is not equal since some  
30  
31 of the enrollees enjoy civil servant subsidies.<sup>14</sup> Whereas disparities in China's insurance  
32  
33 programs and patient's utilization of healthcare have been well-documented in the  
34  
35 literature, no studies have yet examined whether patient preferences for new medical  
36  
37 technology vary by type of insurance. This study aimed to fill the gap. Eliciting  
38  
39 patients' preferences and involving patients in health insurance decision-making can be  
40  
41 helpful to increase satisfaction of patients and is an integral part of  
42  
43 patient-centered care, which is defined as providing care that is respectful of, and  
44  
45 responsive to individual patient preferences, needs and values.<sup>15</sup> Although  
46  
47 patient-centered approach and value-based care has been long advocated in China, there  
48  
49 still a lack of evidence from patients that reflect their preferences to inform health  
50  
51 insurance coverage decision-making. This study added new information to the literature  
52  
53 by conducting a discrete choice experiment (DCE), which is an attribute-based method  
54  
55 to measure the preferences and trade-off of responders and becomes a recognized  
56  
57 scientific approach to elicit preferences.<sup>16</sup> Prior research showed that DCE was fruitful  
58  
59 and reliable to effectively improve healthcare decision-making.<sup>17</sup> Our DCE focused on  
60

1  
2  
3  
4  
5 chronic disease patients, and its goal was to support evidence-informed insurance  
6 policy-making in China. Specifically, we used the DCE data to test the following  
7 hypotheses: (1) new technology attributes regarding health benefits are most preferred  
8 by chronic disease patients for health insurance coverage; (2) patients' preferences  
9 differ by type of disease and type of insurance.  
10  
11  
12  
13  
14

## 15 **METHODS**

### 16 **Identification of technology attributes and levels**

17  
18  
19  
20  
21  
22 Our DEC design, implementation, and analysis followed the user guide developed  
23 jointly by the World Bank, World Health Organization, and U.S. Agency for  
24 International Development.<sup>18</sup> We used a three-step approach to complete the  
25 preliminary stage of our DCE, which aimed to identify and define the attributes and  
26 levels of new medical technologies. First, a systematic review was conducted to select  
27 attributes which were often used in multi-criteria decision analyses of health insurance  
28 decision-making. The systematic review was performed according to the framework for  
29 evidence-based decision-making as defined by EVIDEM.<sup>19</sup> We found that the most  
30 commonly mentioned dimensions were comparative outcomes (effectiveness,  
31 safety/tolerability), economic consequences (costs and cost-effectiveness) and needs of  
32 new technologies (severity of target disease, size of affected population, unmet needs  
33 related to the already reimbursed technologies), and knowledge of new technologies  
34 (quality of evidence, expert consensus/clinical practice guideline). Results of the  
35 systematic review were published in a separate paper.<sup>20</sup>  
36  
37  
38  
39  
40  
41  
42  
43  
44  
45  
46  
47  
48

49  
50 Second, both focus group discussions with physicians and patients and expert  
51 consultation were carried out to determine attributes used in our research. Since there  
52 was no consensus among experts about the criteria to determine the level of attributes of  
53 new technologies to treat diabetes and hypertension, we searched the famous health  
54 technology assessment database established by Canadian Agency for Drugs and  
55 Technologies in Health (CADTH) to help select potential new technologies and find  
56  
57  
58  
59  
60

1  
2  
3  
4  
5 reasons for recommendation of reimbursement. We found 68 reports regarding  
6  
7 hypertension and diabetes which were published before March 2018. Data extraction  
8  
9 form was developed and attributes of new technologies were extracted. We further  
10  
11 searched the database founded by China National Medical Products Administration  
12  
13 (NMPA, formerly China Food and Drug Administration or CFDA) according to the  
14  
15 generic name of new technologies to see if they were approved and available in China.  
16  
17 We also referred to the list published by city governments in Jiangsu Province about the  
18  
19 medical technologies which were already covered by the public health insurance  
20  
21 programs. After completing the database search, we defined new medical technologies  
22  
23 in this study as the therapeutics for hypertension and diabetes, which had been marketed  
24  
25 in China but were not covered by the public health insurance programs in Jiangsu in  
26  
27 2018. We also determined the range of out-of-pocket costs according to the retail prices  
28  
29 of new technologies and the current level of reimbursement by the public health  
30  
31 insurance programs.

32  
33 Third, we chose unlabeled over labeled DCE. Unlabeled DCE was widely used to  
34  
35 investigate patients' preferences for treatment techniques.<sup>21-23</sup> Respondents of unlabeled  
36  
37 DCEs found that they were not subject to the psychological cues of the technology  
38  
39 labels, thus reflecting the real-world choice situation.<sup>24</sup> In addition, in our research, new  
40  
41 medical technologies to treat chronic disease continue to emerge. Therefore, an  
42  
43 unlabeled DCE was considered appropriate for our study. Attributes and levels of new  
44  
45 medical technologies which were used in our research were listed in Table 1.  
46  
47  
48  
49  
50  
51  
52  
53  
54  
55  
56  
57  
58  
59  
60

**Table 1. Technology attributes and levels included in the DCE**

| Attributes                                              | Levels                                    | Variables coding |
|---------------------------------------------------------|-------------------------------------------|------------------|
| Expected gains in health outcomes from the treatment    | Not as expected; As expected              | Binary           |
| Likelihood of effective treatment                       | 30%-90%                                   | Continuous       |
| Severity of target disease                              | Not severe; Severe but not lethal; Lethal | Categorical      |
| Incidence of serious adverse events                     | Often; Occasionally; Never or rarely      | Categorical      |
| Alternative technologies currently covered by insurance | Yes; No                                   | Binary           |
| Out-of-pocket costs per month (if not reimbursed)       | CNY 300-3500                              | Continuous       |

The average exchange rate of US Dollars to Chinese Yuan (CNY) in 2018 was about 6.56. Therefore, CNY 300 was approximately US\$46; CNY 3500 were about US\$533.

## Experimental design and development of the questionnaire

D-efficiency experimental design that maximized the precision of estimated choice-model parameters for a given number of choice questions<sup>25</sup> was created by Ngene1.1.2 software (Choice-Metrics, Sydney, Australia). Prior coefficients were set to zero during the pilot. After obtaining priors of the attributes from the pilot, Bayesian-efficient design was used to generate the final choice sets, which consisted of 30 pairs of scenarios and were divided into five blocks, with six pairs in each block. Examples of scenarios were shown in Appendix 1. Our final questionnaire contained two sections. Section A listed questions regarding participants' socio-demographic characteristics, past medical history, reasons for hospital visit, and health insurance information; Section B was the DCE task.

## DCE implementation and data collection

Our DCE was carried out from September 15<sup>th</sup> to October 15<sup>th</sup>, 2018 in six tertiary public hospitals from four cities in Jiangsu Province. Inclusion criteria for patients including inpatients aged 18 years or older, participating in a public health insurance program, with a history of diabetes or hypertension, and taking medications regularly for more than one year. Patients were enrolled consecutively during the study period.

1  
2  
3  
4  
5 A total of 410 patients were consented to take part in the DCE survey, and the data  
6 from 408 patients were available for analysis with two patients excluded from the  
7 analysis due to non-compliance with the inclusion criteria or incomplete data (For  
8 details about number of patients in each sample hospital, see Appendix 2). There was no  
9 general standard on the ideal sample size required for a DCE<sup>26</sup>. The published research  
10 indicated that model estimate precision increased rapidly for DCEs with sample sizes  
11 greater than 150 and then flattened out at around a sample of 300.<sup>27</sup> The minimum  
12 sample size of 200 respondents per subgroup could be good for studies investigating  
13 heterogeneity among subgroups.<sup>28</sup> Therefore, our sample satisfies the DCE sample size  
14 requirement as suggested by most researchers.  
15  
16  
17  
18  
19  
20  
21  
22  
23

24 The DCE questionnaire was administered through one-to-one, face-to-face  
25 interviews to ensure validity and quality of the investigation. Our interviewers consisted  
26 of 13 medical students, all of whom were in hospitals doing their internships during the  
27 research period. For quality assurance, the interviewers were trained before the  
28 experiment. We compiled a survey training manual, provided detailed descriptions of  
29 how to interpret each scenario, and asked each interviewer to make explanations to  
30 patients. The interviewers were required to check whether the entire questionnaire was  
31 complete immediately after each interview. If any information was missing, they had to  
32 go back to ask patients to provide the information on site. For patients with blurred  
33 vision or illiteracy, the interviewers explained the meaning of the questionnaire item by  
34 item until the patients fully understood each item.  
35  
36  
37  
38  
39  
40  
41  
42  
43  
44  
45

## 46 **Patient involvement**

47  
48  
49 Verbal informed consent was obtained from all patients prior to both the pilot and the  
50 final survey. Patients were made aware that the participation in the survey was  
51 voluntary. All data and information collected from patients were anonymous. We did a  
52 pilot study that included 90 patients with diabetes or hypertension. Intelligibility,  
53 acceptability and reliability of the questionnaire were tested during the pilot. After the  
54  
55  
56  
57  
58  
59  
60

questionnaire was finalized, we conducted the DCE survey, during which patients had to make a decision based on the assumption that only one technology can be covered due to limited health insurance funds. They were asked to think carefully and trade-off between two new medical technologies. The survey time ranged from 20 minutes to one hour. We prepared a packed cotton towel for each patient as a gift (CNY 10, or US\$1.4). Results of this study were not disseminated to the included patients.

## Data analysis

Our empirical analysis of the DCE data was based on the random utility model and assumed that the utility of two scenarios was equal. Like prior research,<sup>18</sup> we considered the utility,  $U$ , that patient,  $i$ , assigned to choice,  $j$ , from  $J$  alternative choices, as the sum of two parts: fixed and random utility. The equation was developed as follows:

$$U_{ij} = V_{ij} + \varepsilon_{ij} = \beta_0 + \beta_1 x_{1ij} + \beta_2 x_{2ij} + \dots + \beta_m x_{mij} + \varepsilon_{ij}$$

where  $V_{ij}$  was the fixed utility determined by patients' preferences of attributes ( $x_1, \dots, x_m$ ),  $\varepsilon_{ij}$  was the random utility which was a function of unobserved attributes and individual-level variation, and  $\beta$  quantified the strength of preference for each attribute level.<sup>18</sup>

We implemented the above equation by estimating conditional logistic regressions using STATA 14.2 SE (StatCorp LP, College Station, Texas, USA). The choice of patients was the dependent variable, and the selected technology attributes were independent variables. Dummy coding was used for categorical variables of our DCE data. Subgroup analysis was performed by type of disease and type of insurance. In each regression model, attribute level with a negative coefficient indicates that patients would prefer not to move from the reference level to that level, while an attribute level with a positive coefficient indicates that patients would prefer to move to that level from the reference level.<sup>29</sup> We first ran the regression model on the entire sample and then on the patients with hypertension and diabetes. We compared the subgroups and entire sample

1  
2  
3  
4  
5 to examine whether the results changed.

6  
7 To examine preference heterogeneity across different insurance schemes in China,  
8 we ran the regression models by type of insurance (URRBMI vs. UEBMI). Given the  
9 variations in benefit coverage, reimbursement rate, and subsidies among patients with  
10 UEBMI, we conducted further analysis by excluding those UEBMI patients who  
11 enjoyed extra health insurance benefits, i.e., who enjoyed public servant subsidies and  
12 the retired veteran cadres.  
13  
14  
15  
16  
17  
18

## 19 **RESULTS**

### 20 **Characteristics of patients**

21  
22  
23  
24  
25  
26 Table 2 presented demographic and clinical characteristics of the included patients.  
27  
28 The sample had more males than females (53.92% vs. 46.08%). The patients had a  
29 mean age of 62.34 years (ranging from 28 to 96 years). They were almost evenly split  
30 between UEBMI and URRBMI (49.26% vs. 50.73%). Most of the patients had  
31 hypertension (63.97%) with 14.22% of them having both hypertension and diabetes  
32 while 21.81% of them had diabetes only. There was no statistically significant  
33 difference between hypertension and diabetes patients in terms of insurance types  
34 (P=0.618) (For details about the types of insurance for hypertension and diabetes  
35 patients, see Appendix 3). Among the 180 patients who had chronic comorbid conditions  
36 other than hypertension and diabetes, cardiovascular disease was the most common  
37 comorbidity (98 patients) (For details about the comorbidities, see Appendix 4).  
38  
39  
40  
41  
42  
43  
44  
45  
46  
47  
48  
49  
50  
51  
52  
53  
54  
55  
56  
57  
58  
59  
60

**Table 2. Characteristics of patients (n=408)**

| Characteristics                                          | n (%)       |
|----------------------------------------------------------|-------------|
| <b>Gender</b>                                            |             |
| Male                                                     | 220 (53.92) |
| Female                                                   | 188 (46.08) |
| <b>Age groups</b>                                        |             |
| 18~45                                                    | 30 (7.35)   |
| 45~59                                                    | 131 (32.11) |
| 60~74                                                    | 184 (45.10) |
| ≥75                                                      | 63 (15.44)  |
| <b>Urban vs. rural household registration</b>            |             |
| Urban                                                    | 210 (51.47) |
| Rural                                                    | 198 (48.53) |
| <b>Education</b>                                         |             |
| Unschooling                                              | 39 (9.56)   |
| Primary school                                           | 108 (26.47) |
| Junior high school                                       | 110 (26.96) |
| High school                                              | 89 (21.81)  |
| Junior college or higher vocational college              | 31 (7.60)   |
| Bachelor's degree or above                               | 31 (7.60)   |
| <b>Employment</b>                                        |             |
| Rural farmer                                             | 105 (25.74) |
| Urban employee                                           | 140 (34.31) |
| Urban retiree                                            | 112 (27.45) |
| Urban unemployed                                         | 51 (12.50)  |
| <b>Type of insurance<sup>#</sup></b>                     |             |
| UEBMI                                                    | 201 (49.26) |
| URRBMI                                                   | 207 (50.74) |
| <b>Family monthly income (CNY)<sup>Δ</sup></b>           |             |
| < 2000                                                   | 83 (20.34)  |
| 2001~4000                                                | 81 (19.85)  |
| 4001~6000                                                | 93 (22.79)  |
| 6001~8000                                                | 69 (16.91)  |
| 8001~10000                                               | 41 (10.05)  |
| >10000                                                   | 41(10.05)   |
| <b>Type of patients</b>                                  |             |
| Outpatients                                              | 83 (20.34)  |
| Inpatients                                               | 325 (79.66) |
| <b>Type of chronic diseases</b>                          |             |
| Hypertension                                             | 261 (63.97) |
| Diabetes                                                 | 89 (21.81)  |
| Both                                                     | 58 (14.22)  |
| <b>Comorbidities other than hypertension or diabetes</b> |             |
| Yes                                                      | 180 (44.12) |
| No                                                       | 228 (55.88) |

<sup>#</sup>1 UEBMI patients, 6 URRBMI patients also enrolled in commercial health insurance

<sup>Δ</sup> The average exchange rate between US Dollars and Chinese Yuan (CNY) in 2018 was 6.56.



## Regression analysis of the DCE data

As presented in Table 3, our analysis found that the study patients valued most the new technologies with never or rare incidence of serious adverse events ( $\beta = 0.442$ ,  $P < 0.001$ ), followed by the expected gains in health outcomes from the treatment ( $\beta = 0.376$ ,  $P < 0.001$ ). Likelihood of effective treatment was also a significant, positive predictor of patients' choice of new technologies ( $\beta = 0.241$ ,  $P < 0.001$ ) while out-of-pocket costs were a significant, negative predictor of patients' choice ( $\beta = -0.122$ ,  $P < 0.001$ ). In comparison, whether there were alternative technologies currently covered by insurance seemed not to be an important factor for the patients ( $P > 0.05$ ).

Table 3 also presented the results from the subgroup analysis by type of disease (hypertension versus diabetes). While the two groups had similar results, there were two notable differences. One was that, although out-of-pocket costs remained a significant, negative predictor, their coefficient for hypertension patients was  $-0.075$  ( $P < 0.001$ ), not as important as it was for patients with diabetes ( $\beta = -0.210$ ,  $P < 0.001$ ). The other was that the expected gains in health outcomes from the treatment seemed to be more important for diabetes patients ( $\beta = 0.553$ ,  $P < 0.001$ ) when compared with those who only had hypertension ( $\beta = 0.287$ ,  $P < 0.001$ ).

**Table 3. DCE results from conditional logistic regression**

| Attributes                                              | All patients |       | Hypertension patients |       | Diabetes patients <sup>#</sup> |       |
|---------------------------------------------------------|--------------|-------|-----------------------|-------|--------------------------------|-------|
|                                                         | Coefficients | SE    | Coefficients          | SE    | Coefficients                   | SE    |
| Expected gains in health outcomes from the treatment    |              |       |                       |       |                                |       |
| <i>Not as expected (reference)</i>                      |              |       |                       |       |                                |       |
| <i>As expected</i>                                      | 0.376***     | 0.057 | 0.287***              | 0.071 | 0.553***                       | 0.098 |
| Increasing likelihood of effective treatment (per 10%)  | 0.241***     | 0.015 | 0.265***              | 0.020 | 0.205***                       | 0.025 |
| Severity of target disease                              |              |       |                       |       |                                |       |
| <i>Not severe (reference)</i>                           |              |       |                       |       |                                |       |
| <i>Severe</i>                                           | 0.156*       | 0.075 | 0.179                 | 0.093 | 0.106                          | 0.129 |
| <i>Lethal</i>                                           | 0.129        | 0.075 | 0.123                 | 0.093 | 0.124                          | 0.129 |
| Incidence of serious adverse events                     |              |       |                       |       |                                |       |
| <i>Often (reference)</i>                                |              |       |                       |       |                                |       |
| <i>Occasionally</i>                                     | 0.292***     | 0.071 | 0.364***              | 0.091 | 0.176                          | 0.117 |
| <i>Never or rarely</i>                                  | 0.442***     | 0.077 | 0.497***              | 0.097 | 0.383**                        | 0.132 |
| Alternative technologies currently covered by insurance |              |       |                       |       |                                |       |
| <i>Yes (reference)</i>                                  |              |       |                       |       |                                |       |
| <i>No</i>                                               | -0.032       | 0.055 | -0.023                | 0.069 | -0.045                         | 0.090 |
| Out-of-pocket costs (thousand CNY per month increase)   | -0.122***    | 0.020 | -0.075**              | 0.025 | -0.210***                      | 0.034 |
| Log likelihood                                          | -1483.373    |       | -943.674              |       | -528.381                       |       |
| Participants                                            | 408          |       | 261                   |       | 147                            |       |
| Observations                                            | 4896         |       | 3132                  |       | 1764                           |       |

<sup>#</sup>Patients with diabetes only and those who had both diabetes and hypertension

\*\*\*P<0.001, \*\*P<0.01, \*P<0.05

Results from a separate analysis focusing exclusively on inpatients were similar to the results for all patients in Table 3 (For details about the inpatients' results, see Appendix 5).

### Subgroup analysis by type of insurance

Table 4 summarized the subgroup analyses by type of insurance. The expected gains in health outcomes from the treatment, likelihood of effective treatment, and low incidence of serious adverse events were significant, positive predictors of technology

1  
2  
3  
4  
5 choice ( $P < 0.001$ ) for both URRBMI and UEBMI patients. Whether there were  
6  
7 alternative technologies currently covered by insurance was statically insignificant for  
8  
9 both groups ( $P > 0.05$ ). However, these two groups differed remarkably in two  
10  
11 technology attributes. The coefficient of out-of-pocket costs was significant for  
12  
13 URRBMI patients ( $\beta = -0.212$ ,  $P < 0.001$ ), but not for UEBMI patients ( $\beta = -0.041$ ,  
14  
15  $P > 0.05$ ). Severity of target disease also had significant coefficients for URRBMI  
16  
17 patients, but not for UEBMI patients.

18  
19 We conducted further analysis of the UEBMI patients by excluding those UEBMI  
20  
21 patients who enjoyed extra health insurance benefits, including who enjoyed public  
22  
23 servant subsidies and the retired veteran cadres, and as indicated by Table 4 Column (3),  
24  
25 we found that out-of-pocket costs were a meaningful attribute for the remaining UEBMI  
26  
27 patients ( $\beta = -0.109$ ,  $P < 0.01$ ) although not so important as viewed by URRBMI patients  
28  
29 ( $\beta = -0.109$  vs.  $\beta = -0.212$ ). On the other hand, severity of target disease remained  
30  
31 statistically insignificant after excluding those UEBMI patients with extra insurance  
32  
33 benefits.  
34  
35  
36  
37  
38  
39  
40  
41  
42  
43  
44  
45  
46  
47  
48  
49  
50  
51  
52  
53  
54  
55  
56  
57  
58  
59  
60

Table 4. Subgroup analysis according to insurance types and benefits

| Attributes                                              | (1)<br>URRBMI patients |       | (2)<br>UEBMI patients |       | (3)<br>UEBMI patients without<br>extra insurance benefits <sup>#</sup> |       |
|---------------------------------------------------------|------------------------|-------|-----------------------|-------|------------------------------------------------------------------------|-------|
|                                                         | Coefficients           | SE    | Coefficients          | SE    | Coefficients                                                           | SE    |
| Expected gains in health outcomes from the treatment    |                        |       |                       |       |                                                                        |       |
| <i>Not as expected (reference)</i>                      |                        |       |                       |       |                                                                        |       |
| <i>As expected</i>                                      | 0.307***               | 0.082 | 0.445***              | 0.081 | 0.428***                                                               | 0.093 |
| Increasing likelihood of effective treatment (per 10%)  | 0.257***               | 0.023 | 0.239***              | 0.022 | 0.261***                                                               | 0.025 |
| Severity of target disease                              |                        |       |                       |       |                                                                        |       |
| <i>Not severe (reference)</i>                           |                        |       |                       |       |                                                                        |       |
| <i>Severe</i>                                           | 0.269*                 | 0.107 | 0.037                 | 0.107 | -0.021                                                                 | 0.123 |
| <i>Lethal</i>                                           | 0.381***               | 0.111 | -0.070                | 0.106 | -0.133                                                                 | 0.123 |
| Incidence of serious adverse events                     |                        |       |                       |       |                                                                        |       |
| <i>Often (reference)</i>                                |                        |       |                       |       |                                                                        |       |
| <i>Occasionally</i>                                     | 0.339**                | 0.105 | 0.218*                | 0.099 | 0.243*                                                                 | 0.114 |
| <i>Never or rarely</i>                                  | 0.468***               | 0.109 | 0.409***              | 0.111 | 0.381**                                                                | 0.127 |
| Alternative technologies currently covered by insurance |                        |       |                       |       |                                                                        |       |
| <i>Yes (reference)</i>                                  |                        |       |                       |       |                                                                        |       |
| <i>No</i>                                               | -0.014                 | 0.082 | -0.090                | 0.075 | -0.184*                                                                | 0.088 |
| Out-of-pocket costs (thousand CNY per month increase)   | -0.212***              | 0.029 | -0.041                | 0.029 | -0.109**                                                               | 0.033 |
| Log likelihood                                          | -716.487               |       | -747.063              |       | -568.155                                                               |       |
| Participants                                            | 207                    |       | 201                   |       | 158                                                                    |       |
| Observations                                            | 2484                   |       | 2412                  |       | 1896                                                                   |       |

\*\*\*P<0.001, \*\*P<0.01, \*P<0.05

<sup>#</sup>This subgroup did not include those UEBMI patients who enjoyed extra health insurance benefits, including who enjoyed public servant subsidies and the retired veteran cadres who enjoyed free medical service.<sup>30</sup>

## DISCUSSION

### Summary of the findings

Our study found that key technology attributes, including expected gains in health outcomes from the treatment, high likelihood of effective treatment, and low incidence of serious adverse events were significant, positive predictors of patient choice for health insurance coverage. These results hold for the entire study sample and for the subgroup analyses.

1  
2  
3  
4  
5 Out-of-pocket costs were a significant, negative predictor for the entire sample,  
6 showing that patients preferences decreased as the out-of-pocket costs increased. We  
7 also found that out-of-pocket costs were a significant, negative predictor for both  
8 hypertension patients and diabetes patients although they were less important for the  
9 former group than for the latter group.  
10  
11  
12  
13

14 When it came to different insurance types, we identified preference heterogeneity  
15 as previous studies of DCE suggested.<sup>31</sup> Specifically, we found that out-of-pocket costs  
16 were a significant, negative predictor for URRBMI patients' preference for insurance  
17 coverage while severity of target disease was a significant, positive predictor for this  
18 group of patients. But neither of these two attributes was a significant predictor for  
19 UEBMI patients. Our further analysis of the UEBMI patients by excluding those  
20 UEBMI patients who enjoyed extra health insurance benefits revealed that the  
21 remaining UEBMI patients regarded out-of-pocket costs as a significant, negative factor  
22 for coverage although severity of target disease stayed statistically insignificant for  
23 them.  
24  
25  
26  
27  
28  
29  
30  
31  
32  
33

### 34 **Comparison with other studies**

35  
36 Our findings of patients' valuing most the effectiveness and safety of medical  
37 technologies were consistent with the results by prior studies from other countries  
38 which aimed to investigate patients' preferences for the treatment of chronic  
39 diseases.<sup>32-36</sup> Our study confirmed that patients preferred new technologies which could  
40 increase health benefits and minimize potential risks.  
41  
42  
43  
44  
45

46 However, variation in patient preferences existed and mainly depended on patients'  
47 own experiences of the disease. Previous research found that the median hospitalization  
48 cost for patients with hypertension was lower than patients with diabetes,<sup>37 38</sup> which  
49 supported our findings that out-of-pocket costs were not as important for hypertension  
50 patients as they were for patients with diabetes.  
51  
52  
53  
54  
55

56 We also identified preference heterogeneity among patients with different types of  
57 insurance. Although China's successful health insurance expansion during the past  
58  
59  
60

1  
2  
3  
4  
5 decade led to the country's universal health insurance coverage, variations in benefit  
6 coverage were manifested among different health insurance schemes,<sup>11</sup> resulting in  
7 inequalities in accessibility and affordability of medical services.<sup>39</sup> Such inequalities  
8 affected patient preferences across different types of insurance. For example, we found  
9 that out-of-pocket costs were a significant, negative predictor for URRBMI patients'  
10 preference, but not for all the UEBMI patients in our sample. The finding reflected the  
11 fact that, compared with URRBMI, UEBMI had better benefit coverage and higher  
12 reimbursement level, especially for those UEBMI patients with extra benefits, such as  
13 the retired veteran cadres and those who enjoyed public servant subsidies. The finding  
14 also fitted into the big picture of disparities across insurance schemes in China that were  
15 illustrated by prior research. The earlier pilot of URRBMI attempting to integrate health  
16 insurance for urban and rural residents and increase benefit coverage was not able to  
17 substantially reduce the inequality between URRBMI and UEBMI patients.<sup>40</sup>

18  
19 We found that URRBMI patients attached importance to severity of disease.  
20 However, the coefficient for severity of disease was non-significant for either  
21 hypertension patients or diabetes patients. The patient distribution by insurance type in  
22 our research was also similar between hypertension and diabetes patients. Therefore, we  
23 concluded that it was very likely that the importance of severity of disease mainly  
24 depended on types of insurance. Previous studies found that chronic disease patients  
25 with URRBMI had lower health service utilization.<sup>41</sup> Furthermore, URRBMI patients  
26 had significantly higher adjusted in-hospital mortality rate and shorter length of stay  
27 when compared with concurrent UEBMI patients.<sup>42 43</sup> These findings suggested that a  
28 plausible explanation for the importance of severity of disease for URRBMI patients  
29 might be mainly due to their medical experiences and their concern about the potential  
30 severe or lethal consequences of chronic diseases.

## 31 32 33 34 35 36 37 38 39 40 41 42 43 44 45 46 47 48 49 50 51 52 53 54 55 56 57 58 59 60

The rising prevalence of chronic diseases in China has major implications on its

1  
2  
3  
4  
5 ability to provide timely, acceptable and affordable healthcare service for its citizens. To  
6  
7 meet the demand for new medical technologies for treating chronic diseases, it is  
8  
9 important for China's policy-makers to consider patient preferences when they decide  
10  
11 on insurance coverage of new medical technologies. Specifically our findings that  
12  
13 patients valued most new medical technologies with substantial health benefits and low  
14  
15 risks suggested such technologies should be the priority of health insurance coverage.

16  
17 Our findings that out-of-pocket costs were a significant concern for URRBMI  
18  
19 patients but not for all the UEBMI patients suggested that policymakers need to take  
20  
21 further efforts to reduce disparities in benefit coverage and reimbursement level  
22  
23 between these two types of insurance and between subgroups with UEBMI. The efforts  
24  
25 will not only enhance financial protections for URRBMI patients and subgroups within  
26  
27 UEBMI patients, but also contribute to China's long-term goal of equalizing benefit  
28  
29 coverage across insurance programs.<sup>9</sup>

30  
31 We also found that URRBMI patients did not care about alternative technologies  
32  
33 currently covered by insurance, a result that was the opposite of that for the UEBMI  
34  
35 patients without extra insurance benefits. Since URRBMI patients on average had a  
36  
37 lower education level than UEBMI patients, one plausible explanation was the lack of  
38  
39 knowledge by URRBMI patients about the alternative technologies currently covered  
40  
41 by insurance. If confirmed by further analysis, then one implication would be that  
42  
43 policymakers and clinicians may need to implement communication and education  
44  
45 strategies to improve URRBMI patients' understanding about the alternative therapies  
46  
47 and reimbursement policies under the current insurance system to increase appropriate  
48  
49 use of the existing therapies.

## 50 **Strengths and limitations**

51  
52 To our knowledge, this is the first study that used DCE to elicit preferences from  
53  
54 chronic disease patients on insurance coverage of new medical technologies in China. It  
55  
56 was also the first study that identified preference heterogeneity among patients with  
57  
58 different types of insurance. Our research was helpful for applying a patient-centered  
59  
60

1  
2  
3  
4  
5 approach to policy-making and generated evidence that could potentially inform  
6 insurance coverage decision-making.  
7

8  
9         Nevertheless, there are several limitations with our study. First, our samples were  
10 from tertiary hospitals in Jiangsu Province. Those patients who sought medical service  
11 from tertiary hospitals generally have serious and/or complex medical conditions with  
12 higher demand for healthcare services than other patients, and may cautiously consider  
13 the issue of medical insurance coverage and reimbursement. Jiangsu is an eastern,  
14 coastal province and one of the most economically developed regions in China. Future  
15 studies are needed to have a nationally representative sample by including patients at  
16 secondary and primary hospitals, and especially by including the economically  
17 underdeveloped regions in China.  
18  
19

20  
21         Second, our study included patients with a history of diabetes or hypertension. Due  
22 to differences in disease nature and characteristics, the results may not represent  
23 preferences from patients with other types of chronic diseases, although prior DCEs<sup>32-36</sup>  
24 made conclusions that were similar to ours in terms of the relative importance of  
25 technology attributes regarding benefits and risks. Future studies need to enroll patients  
26 with other diseases, and performing subgroup analysis to find variations of patient  
27 preferences across different types of diseases.  
28  
29

30  
31         Third, there were only 43 UEBMI patients who enjoyed additional privileges of  
32 health insurance, and the limited sample size prevented us from conducting a separate  
33 analysis of this subgroup. Similarly, our sample included 89 patients with diabetes and  
34 58 patients with both diabetes and hypertension, not allowing for a reliable analysis for  
35 each of these two subgroups. Further research is still needed to focus on these  
36 subgroups.  
37  
38  
39

## 40 41 42 43 44 45 46 47 48 49 50 51 52 53 **CONCLUSION**

54  
55         Chronic disease patients valued most the health benefits and risks of new  
56 technologies, which were closely related to their own experiences and feelings.  
57  
58  
59  
60



1  
2  
3  
4  
5 Policymakers need to consider new technologies with high therapeutic effectiveness and  
6 benefit and low risk for treating chronic diseases as a priority for health insurance  
7 coverage. Further efforts should also be made to reduce the gaps in benefit coverage and  
8 reimbursement level between insurance schemes to promote equal access to healthcare  
9 services in China.  
10  
11  
12  
13

### 14 15 **Ethics approval**

16  
17 This study, including the patient consent process, was approved by the Medical  
18 Ethics Committee in Affiliated Hospitals of Nantong University (Ethical  
19 Approval-2016031), and conforms to the ethical guidelines of the Declaration of  
20 Helsinki.  
21  
22  
23  
24

### 25 26 **Acknowledgments**

27  
28 We acknowledge the important contributions of our interviewers who did  
29 one-to-one, face-to-face interviews with the patients. We are also grateful to all the  
30 patients for their time and efforts.  
31  
32  
33

34 At the time of drafting the manuscript, Jinsong Geng was a fellow at the  
35 Fellowship in Health Policy and Insurance Research, Department of Population  
36 Medicine, Harvard Medical School and Harvard Pilgrim Healthcare Institute.  
37  
38  
39  
40

### 41 42 **Author contributions**

43  
44 Geng JS, Chen XW, and Yu H led the design and analysis of the discrete choice  
45 experiment. Geng JS, Chen XW contributed to literature search and data interpretation.  
46 Bao HN, Qian DM, Shao YT contributed to implementing the discrete choice  
47 experiment. Geng JS and Yu H performed statistical analysis and wrote the manuscript.  
48  
49  
50  
51

### 52 53 **Funding**

54  
55 This work was supported by National Natural Science Foundation of China (Grant  
56 No. 71603138) and Jiangsu Overseas Visiting Scholar Program for University  
57 Prominent Young & Middle-aged Teachers and Presidents.  
58  
59  
60

1  
2  
3  
4  
5 The funders provided financial support for the conduct of the study. The funders  
6 had no role in the design, implementation, data collection and statistical analysis, data  
7 interpretation, or writing of the manuscript.  
8  
9

## 10 11 12 **Disclosure**

13  
14 The authors report no conflict of interest in this research.  
15

## 16 17 **Data sharing statement**

18  
19 Data will be available upon reasonable request to corresponding author.  
20  
21  
22

## 23 24 **References**

- 25 1. World Health Organization. *Global action plan for the prevention and control of*  
26 *noncommunicable diseases 2013-2020*. Geneva: World Health Assembly, 2013:5-9.
- 27 2. Lu J, Lu Y, Wang X, *et al*. Prevalence, awareness, treatment, and control of hypertension in  
28 China: data from 1.7 million adults in a population-based screening study (China PEACE Million  
29 Persons Project). *Lancet* 2017;390:2549-58.
- 30 3. Wang L, Gao P, Zhang M, *et al*. Prevalence and ethnic pattern of diabetes and prediabetes in  
31 China in 2013. *JAMA* 2017;317:2515-23.
- 32 4. Adriaanse MC, Drewes HW, van der Heide I, *et al*. The impact of comorbid chronic  
33 conditions on quality of life in type 2 diabetes patients. *Qual Life Res* 2016;25:175-82.
- 34 5. Aubert CE, Fankhauser N, Marques-Vidal P, *et al*. Patterns of multimorbidity in internal  
35 medicine patients in Swiss university hospitals: a multicentre cohort study. *Swiss Med Wkly*  
36 2019;149:w20094.
- 37 6. Wang J, Ma JJ, Liu J, *et al*. Prevalence and risk factors of comorbidities among hypertensive  
38 patients in China. *Int J Med Sci* 2017;14:201-12.
- 39 7. Bloom DE, Chen S, Kuhn M, *et al*. The economic burden of chronic diseases: estimates and  
40 projections for China, Japan, and South Korea. *JEoA* 2018:100163.
- 41 8. Yip W, Fu H, Chen AT, *et al*. 10 years of health-care reform in China: progress and gaps in  
42 Universal Health Coverage. *Lancet* 2019;394:1192-204.
- 43 9. Yu H. Universal health insurance coverage for 1.3 billion people: what accounts for China's  
44 success? *Health Policy* 2015;119:1145-52.
- 45 10. Li Y, Zhao Y, Yi D, *et al*. Differences exist across insurance schemes in China  
46 post-consolidation. *PloS One* 2017;12:e0187100.
- 47 11. Xiong X, Zhang Z, Ren J, *et al*. Impact of universal medical insurance system on the  
48 accessibility of medical service supply and affordability of patients in China. *PloS One*  
49 2018;13:e0193273.
- 50 12. Xian W, Xu X, Li J, *et al*. Health care inequality under different medical insurance schemes  
51  
52  
53  
54  
55  
56  
57  
58  
59  
60

1  
2  
3  
4 in a socioeconomically underdeveloped region of China: a propensity score matching analysis. *BMC*  
5 *Public Health* 2019;19:1373.

7 13. The State Council of the People's Republic of China. Opinion of the State Council on  
8 integrating the basic health insurance system for urban and rural residents, 2016. Available:  
9 [http://www.gov.cn/zhengce/content/2016-01/12/content\\_10582.htm](http://www.gov.cn/zhengce/content/2016-01/12/content_10582.htm)

11 14. General Office of the State Council of the People's Republic of China. Notice of the  
12 General Office of the State Council on transmitting the opinions from the Ministry of Labor and  
13 Social Security and the Ministry of Finance on the implementation of medical subsidies for national  
14 civil servants, 2000. Available: [http://www.gov.cn/gongbao/content/2000/content\\_60249.htm](http://www.gov.cn/gongbao/content/2000/content_60249.htm)

16 15. Institute of Medicine Committee on Quality of Health Care in America. *Crossing the*  
17 *quality chasm: a new health system for the 21st century*. Washington, D.C.: The National Academies  
18 Press, 2001.

20 16. Lancsar E, Fiebig DG, Hole AR. Discrete choice experiments: a guide to model  
21 specification, estimation and software. *Pharmacoeconomics* 2017;35:697-716.

23 17. Clark MD, Determann D, Petrou S, *et al*. Discrete choice experiments in health economics:  
24 a review of the literature. *Pharmacoeconomics* 2014;32:883-902.

26 18. World Health Organization. *How to conduct a discrete choice experiment for health*  
27 *workforce recruitment and retention in remote and rural areas: a user guide with case studies*.  
28 Geneva:World Health Organization Press, 2012.

29 19. Goetghebeur MM, Wagner M, Khoury H, *et al*. Evidence and value: impact on  
30 DEcisionMaking--the EVIDEM framework and potential applications. *BMC Health Serv Res*  
31 2008;8:270.

33 20. Chen XW, Chen Q, Geng JS, *et al*. The application of multi-criteria decision analysis in  
34 medical insurance reimbursement: a systematic review. *Chinese Health Resources* 2018;21:218-23.

36 21. Nichols E, O'Hara NN, Degani Y, *et al*. Patient preferences for nutritional supplementation  
37 to improve fracture healing: a discrete choice experiment. *BMJ Open* 2018;8:e019685.

39 22. van Dijk JD, Groothuis-Oudshoorn CG, Marshall DA, *et al*. An empirical comparison of  
40 discrete choice experiment and best-worst scaling to estimate stakeholders' risk tolerance for hip  
41 replacement surgery. *Value Health* 2016;19:316-22.

43 23. Bhattarai N, McMeekin P, Price CI, *et al*. Preferences for centralised emergency medical  
44 services: discrete choice experiment. *BMJ Open* 2019;9:e030966.

46 24. Kløjgaard ME, Bech M, Søgaard R. Designing a stated choice experiment: the value of a  
47 qualitative process. *J Choice Model* 2012;5:1-18.

49 25. Hensher DA, Rose JM, Greene WH. *Applied Choice Analysis (2nd Edition)*. Cambridge:  
50 Cambridge University Press, 2015.

51 26. de Bekker-Grob EW, Donkers B, Jonker MF, *et al*. Sample size requirements for  
52 discrete-choice experiments in healthcare: a practical guide. *Patient* 2015;8:373-84.

54 27. Reed Johnson F, Lancsar E, Marshall D, *et al*. Constructing experimental designs for  
55 discrete-choice experiments: report of the ISPOR Conjoint Analysis Experimental Design Good  
56 Research Practices Task Force. *Value Health* 2013;16:3-13.

57 28. Orme B. *Getting started with conjoint analysis: strategies for product design and pricing*  
58 *research (2nd Edition)*. Madison, Wisconsin: Research Publishers LLC, 2010.

59 29. Oluboyede Y, Ternent L, Vale L, *et al*. Using a discrete-choice experiment to estimate the  
60

1  
2  
3  
4 preferences of clinical practitioners for a novel non-invasive device for diagnosis of peripheral  
5 arterial disease in primary care. *Pharmacoecoon Open* 2019;3:571-81.

6  
7 30. The State Council of the People's Republic of China. Decision of the State Council on  
8 establishing a basic health insurance system for urban employees, 1998. Available:  
9 [http://www.gov.cn/banshi/2005-08/04/content\\_20256.htm](http://www.gov.cn/banshi/2005-08/04/content_20256.htm)

10  
11 31. de Bekker-Grob EW, Swait JD, Kassahun HT, *et al.* Are healthcare choices predictable?  
12 The impact of discrete choice experiment designs and models. *Value Health* 2019;22:1050-62.

13  
14 32. Brockelmann PJ, McMullen S, Wilson JB, *et al.* Patient and physician preferences for  
15 first-line treatment of classical Hodgkin lymphoma in Germany, France and the United Kingdom. *Br*  
16 *J Haematol* 2019;184:202-14.

17  
18 33. Forsander G, Stallknecht S, Samuelsson U, *et al.* Preferences for treatment among  
19 adolescents with Type 1 diabetes: a national study using a discrete choice experiment model. *Diabet*  
20 *Med* 2018;35:621-29.

21  
22 34. Havrilesky LJ, Lim S, Ehrisman JA, *et al.* Patient preferences for maintenance PARP  
23 inhibitor therapy in ovarian cancer treatment. *Gynecol Oncol* 2020 doi:  
24 10.1016/j.ygyno.2020.01.026.

25  
26 35. Ho KA, Acar M, Puig A, *et al.* What do Australian patients with inflammatory arthritis  
27 value in treatment? A discrete choice experiment. *Clin Rheumatol* 2019 doi:  
28 10.1007/s10067-019-04843-4.

29  
30 36. Thieu VT, Robinson S, Kennedy-Martin T, *et al.* Patient preferences for glucagon-like  
31 peptide 1 receptor-agonist treatment attributes. *Patient Prefer Adherence* 2019;13:561-76.

32  
33 37. Mutowo MP, Lorgelly PK, Laxy M, *et al.* The hospitalization costs of diabetes and  
34 hypertension complications in Zimbabwe: estimations and correlations. *J Diabetes Res*  
35 2016;2016:9754230.

36  
37 38. Rosa MQM, Rosa RDS, Correia MG, *et al.* Disease and economic burden of  
38 hospitalizations attributable to diabetes mellitus and its complications: a nationwide study in Brazil.  
39 *Int J Environ Res Public Health* 2018;15: E294.

40  
41 39. Zhao C, Wang C, Shen C, *et al.* China's achievements and challenges in improving health  
42 insurance coverage. *Drug Discov Ther* 2018;12:1-6.

43  
44 40. Zhao M, Liu B, Shan L, *et al.* Can integration reduce inequity in healthcare utilization?  
45 Evidence and hurdles in China. *BMC Health Serv Res* 2019;19:654.

46  
47 41. Xie X, Wu Q, Hao Y, *et al.* Identifying determinants of socioeconomic inequality in health  
48 service utilization among patients with chronic non-communicable diseases in China. *PloS One*  
49 2014;9:e100231.

50  
51 42. Chen H, Shi L, Xue M, *et al.* Geographic variations in in-hospital mortality and use of  
52 percutaneous coronary intervention following acute myocardial infarction in China: a nationwide  
53 cross-sectional analysis. *J Am Heart Assoc* 2018;7:e008131.

54  
55 43. Lin X, Cai M, Tao H, *et al.* Insurance status, in-hospital mortality and length of stay in  
56 hospitalised patients in Shanxi, China: a cross-sectional study. *BMJ Open* 2017;7:e015884.

## Appendix 1: Examples of DCE choice sets

Medical interventions A and B are used to treat chronic diseases, and currently they were not covered in the social insurance reimbursement list. If you are forced to make a choice, which intervention should be reimbursed by social insurance? There is no right or wrong answers; please make the choice according to your own opinion.

| Attributes                                                    | New technology A                                                                                                 | New technology B                                                                                              |
|---------------------------------------------------------------|------------------------------------------------------------------------------------------------------------------|---------------------------------------------------------------------------------------------------------------|
| Expected gains in health outcomes from the treatment          | <br><b>As expected</b>          | <br><b>Not as expected</b> |
| Likelihood of effective treatment                             | <br><b>30%</b>                 | <br><b>90%</b>            |
| Severity of target disease                                    | <br><b>Severe, not lethal</b> | <br><b>Not severe</b>    |
| Incidence of serious adverse events (life-threatening)        | <br><b>Never or rarely</b>    | <br><b>Often</b>         |
| Alternative technologies currently covered by insurance       | <b>Yes</b>                                                                                                       | <b>No</b>                                                                                                     |
| Out-of-pocket costs for new technology (if not reimbursed)    | <b>1500 CNY per month</b>                                                                                        | <b>3500 CNY per month</b>                                                                                     |
| Which one should be covered by medical insurance? Your choice | <input data-bbox="754 1906 836 1962" type="checkbox"/>                                                           | <input data-bbox="1129 1906 1211 1962" type="checkbox"/>                                                      |

1  
2  
3  
4  
5 **Notes:** Explanations to attributes and levels, investigators were required to convey the following  
6 definitions to patients  
7

- 8
- 9 • ‘Expected gains in health outcomes from the treatment’ means the ideal treatment objectives  
10 mentioned in domestic evidence-based guidelines for specific patients can be achieved; ‘Not  
11 as expected’ indicates that there can be some treatment effects, however, the ideal treatment  
12 targets cannot be fully achieved.
  - 13 • ‘Increasingly probability of the effective treatment’ equals to the attribute ‘gains in health  
14 outcomes from the treatment’ in choice sets: a new medical technology which can reach its  
15 expected gains in health outcomes is effective.
  - 16 • For the severity of target disease, ‘not severe’ means the target disease of new technology is  
17 none fatal and has no impact on patients’ quality of life; ‘severe’ suggests the target disease  
18 of new technology is none fatal, however, patients’ quality of life was significantly reduced;  
19 ‘lethal’ means the target disease of new technology is fatal and patients will probably die  
20 from the disease.
  - 21 • For Incidence of serious adverse events, ‘often’ equals to or a little bit higher than 10%;  
22 occasionally was about 3%.
  - 23 • ‘Serious adverse events’ means life-threatening adverse events caused by the new  
24 technology, like severe hypoglycemia, severe hypersensitivity reaction, kidney or liver  
25 damage, etc.
- 26  
27  
28  
29  
30  
31  
32  
33  
34  
35  
36  
37  
38  
39  
40  
41  
42  
43  
44  
45  
46  
47  
48  
49  
50  
51  
52  
53  
54  
55  
56  
57  
58  
59  
60

## Appendix 2: Number of patients included in sample hospitals

Supplemental Table 1 Number of patients in each sample hospital

| Name of hospital                            | City    | Number of patients |
|---------------------------------------------|---------|--------------------|
| Taizhou People's Hospital                   | Taizhou | 60                 |
| Jiangyin People's Hospital                  | Wuxi    | 40                 |
| First People's Hospital of Wujiang District | Suzhou  | 60                 |
| Nantong First People's Hospital             | Nantong | 23                 |
| Nantong Third People's Hospital             | Nantong | 100                |
| Affiliated Hospital of Nantong University   | Nantong | 125                |

## Appendix 3: Distribution of patients by type of disease and type of health insurance

Supplemental Table 2 Types of insurance for patients with hypertension and diabetes

| Insurance | Hypertension | Diabetes <sup>#</sup> |
|-----------|--------------|-----------------------|
| URRBMI    | 130          | 77                    |
| UEBMI     | 131          | 70                    |
| Total     | 261          | 147                   |

$\chi^2=0.249$ , P=0.618

<sup>#</sup>Patients with diabetes only and those who had both diabetes and hypertension



1  
2  
3  
4  
5  
6  
7  
8  
9  
10  
11  
12  
13  
14  
15  
16  
17  
18  
19  
20  
21  
22  
23  
24  
25  
26  
27  
28  
29  
30  
31  
32  
33  
34  
35  
36  
37  
38  
39  
40  
41  
42  
43  
44  
45  
46  
47  
48  
49  
50  
51  
52  
53  
54  
55  
56  
57  
58  
59  
60

Appendix 4: Types of chronic commodities for the included patients

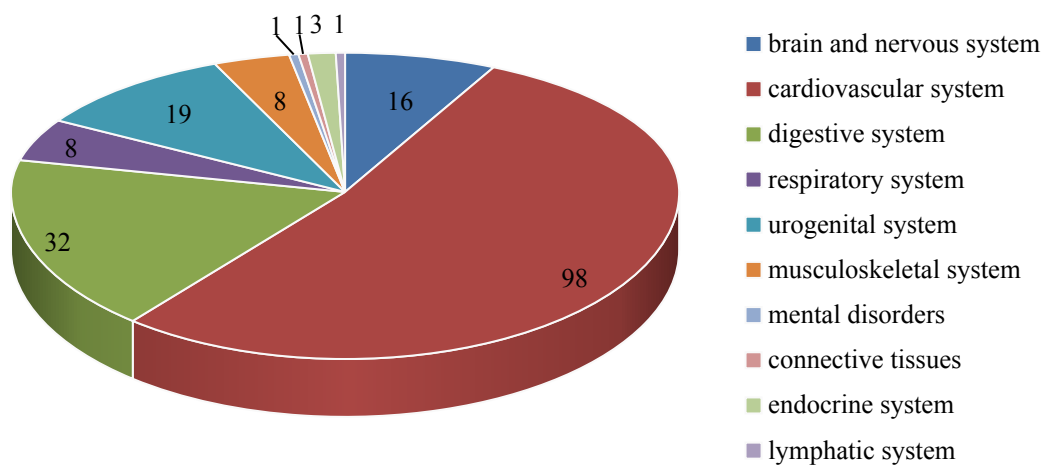

Supplemental Figure 1 Number of patients with chronic commodities

peer review only

## Appendix 5: DCE results for inpatients

Supplemental Table 3 DCE results for inpatients

| Attributes                                              | Coefficients | SE    |
|---------------------------------------------------------|--------------|-------|
| Expected gains in health outcomes from the treatment    |              |       |
| <i>Not as expected (reference)</i>                      |              |       |
| <i>As expected</i>                                      | 0.381***     | 0.066 |
| Increasing likelihood of effective treatment (per 10%)  |              |       |
|                                                         | 0.260***     | 0.018 |
| Severity of target disease                              |              |       |
| <i>Not severe (reference)</i>                           |              |       |
| <i>Severe</i>                                           | 0.091        | 0.085 |
| <i>Lethal</i>                                           | 0.031        | 0.088 |
| Incidence of serious adverse events                     |              |       |
| <i>Often (reference)</i>                                |              |       |
| <i>Occasionally</i>                                     | 0.313***     | 0.081 |
| <i>Never or rarely</i>                                  | 0.578***     | 0.088 |
| Alternative technologies currently covered by insurance |              |       |
| <i>Yes (reference)</i>                                  |              |       |
| <i>Not available</i>                                    | -0.019       | 0.063 |
| Out-of-pocket costs (thousand CNY per month increase)   |              |       |
|                                                         | -0.190***    | 0.023 |
| Log likelihood                                          | -1141.407    |       |
| Participants                                            | 325          |       |
| Observations                                            | 3900         |       |

\*\*\*P<0.001, \*\*P<0.01, \*P<0.05

**STROBE 2007 (v4) checklist of items to be included in reports of observational studies in epidemiology\***  
**Checklist for cohort, case-control, and cross-sectional studies (combined)**

| Section/Topic             | Item # | Recommendation                                                                                                                                                                                                                                                                                                                                                                                                                                                         | Reported on page #                          |
|---------------------------|--------|------------------------------------------------------------------------------------------------------------------------------------------------------------------------------------------------------------------------------------------------------------------------------------------------------------------------------------------------------------------------------------------------------------------------------------------------------------------------|---------------------------------------------|
| Title and abstract        | 1      | (a) Indicate the study’s design with a commonly used term in the title or the abstract                                                                                                                                                                                                                                                                                                                                                                                 | Page 2                                      |
|                           |        | (b) Provide in the abstract an informative and balanced summary of what was done and what was found                                                                                                                                                                                                                                                                                                                                                                    | Page 3-4                                    |
| <b>Introduction</b>       |        |                                                                                                                                                                                                                                                                                                                                                                                                                                                                        |                                             |
| Background/rationale      | 2      | Explain the scientific background and rationale for the investigation being reported                                                                                                                                                                                                                                                                                                                                                                                   | Page 6-7                                    |
| Objectives                | 3      | State specific objectives, including any pre-specified hypotheses                                                                                                                                                                                                                                                                                                                                                                                                      | Page 8 (line 5-13)                          |
| <b>Methods</b>            |        |                                                                                                                                                                                                                                                                                                                                                                                                                                                                        |                                             |
| Study design              | 4      | Present key elements of study design early in the paper                                                                                                                                                                                                                                                                                                                                                                                                                | Page 8 (line 22-30)                         |
| Setting                   | 5      | Describe the setting, locations, and relevant dates, including periods of recruitment, exposure, follow-up, and data collection                                                                                                                                                                                                                                                                                                                                        | Page 8-10                                   |
| Participants              | 6      | (a) <i>Cohort study</i> —Give the eligibility criteria, and the sources and methods of selection of participants. Describe methods of follow-up<br><i>Case-control study</i> —Give the eligibility criteria, and the sources and methods of case ascertainment and control selection. Give the rationale for the choice of cases and controls<br><i>Cross-sectional study</i> —Give the eligibility criteria, and the sources and methods of selection of participants | Page 10 (line 51-59)                        |
|                           |        | (b) <i>Cohort study</i> —For matched studies, give matching criteria and number of exposed and unexposed<br><i>Case-control study</i> —For matched studies, give matching criteria and the number of controls per case                                                                                                                                                                                                                                                 | Not applicable                              |
| Variables                 | 7      | Clearly define all outcomes, exposures, predictors, potential confounders, and effect modifiers. Give diagnostic criteria, if applicable                                                                                                                                                                                                                                                                                                                               | Page 9 (line 32-44);<br>Page 10 (line 5-22) |
| Data sources/ measurement | 8*     | For each variable of interest, give sources of data and details of methods of assessment (measurement). Describe comparability of assessment methods if there is more than one group                                                                                                                                                                                                                                                                                   | Page 11;<br>Page 12 (line 5-14)             |
| Bias                      | 9      | Describe any efforts to address potential sources of bias                                                                                                                                                                                                                                                                                                                                                                                                              | Page 11 (line 24-44)                        |
| Study size                | 10     | Explain how the study size was arrived at                                                                                                                                                                                                                                                                                                                                                                                                                              | Page 11 (line 5-23)                         |
| Quantitative variables    | 11     | Explain how quantitative variables were handled in the analyses. If applicable, describe which groupings were chosen and why                                                                                                                                                                                                                                                                                                                                           | Page 12 (line 41-47)                        |
| Statistical methods       | 12     | (a) Describe all statistical methods, including those used to control for confounding                                                                                                                                                                                                                                                                                                                                                                                  | Page 12 (line 22-40)                        |
|                           |        | (b) Describe any methods used to examine subgroups and interactions                                                                                                                                                                                                                                                                                                                                                                                                    | Page 12 (line 48-59);<br>Page 13 (line 5-9) |
|                           |        | (c) Explain how missing data were addressed                                                                                                                                                                                                                                                                                                                                                                                                                            | Page 11 (line 36-44)                        |

|                          |     |                                                                                                                                                                                                                                                                                                           |                                                                      |
|--------------------------|-----|-----------------------------------------------------------------------------------------------------------------------------------------------------------------------------------------------------------------------------------------------------------------------------------------------------------|----------------------------------------------------------------------|
|                          |     | (d) <i>Cohort study</i> —If applicable, explain how loss to follow-up was addressed<br><i>Case-control study</i> —If applicable, explain how matching of cases and controls was addressed<br><i>Cross-sectional study</i> —If applicable, describe analytical methods taking account of sampling strategy | Not applicable                                                       |
|                          |     | (e) Describe any sensitivity analyses                                                                                                                                                                                                                                                                     | Page 13 (line 10-17)                                                 |
| <b>Results</b>           |     |                                                                                                                                                                                                                                                                                                           |                                                                      |
| Participants             | 13* | (a) Report numbers of individuals at each stage of study—eg numbers potentially eligible, examined for eligibility, confirmed eligible, included in the study, completing follow-up, and analysed                                                                                                         | Page 11 (line 5-12)                                                  |
|                          |     | (b) Give reasons for non-participation at each stage                                                                                                                                                                                                                                                      | Not applicable                                                       |
|                          |     | (c) Consider use of a flow diagram                                                                                                                                                                                                                                                                        | Not applicable                                                       |
| Descriptive data         | 14* | (a) Give characteristics of study participants (eg demographic, clinical, social) and information on exposures and potential confounders                                                                                                                                                                  | Page 13 (line 26-46);<br>Page 14                                     |
|                          |     | (b) Indicate number of participants with missing data for each variable of interest                                                                                                                                                                                                                       | Not applicable                                                       |
|                          |     | (c) <i>Cohort study</i> —Summarise follow-up time (eg, average and total amount)                                                                                                                                                                                                                          | Not applicable                                                       |
| Outcome data             | 15* | <i>Cohort study</i> —Report numbers of outcome events or summary measures over time                                                                                                                                                                                                                       |                                                                      |
|                          |     | <i>Case-control study</i> —Report numbers in each exposure category, or summary measures of exposure                                                                                                                                                                                                      |                                                                      |
|                          |     | <i>Cross-sectional study</i> —Report numbers of outcome events or summary measures                                                                                                                                                                                                                        | Page 15-18                                                           |
| Main results             | 16  | (a) Give unadjusted estimates and, if applicable, confounder-adjusted estimates and their precision (eg, 95% confidence interval). Make clear which confounders were adjusted for and why they were included                                                                                              | Page 16 (Table 3);<br>Page 18 (Table 4)                              |
|                          |     | (b) Report category boundaries when continuous variables were categorized                                                                                                                                                                                                                                 | Not applicable                                                       |
|                          |     | (c) If relevant, consider translating estimates of relative risk into absolute risk for a meaningful time period                                                                                                                                                                                          | Not applicable                                                       |
| Other analyses           | 17  | Report other analyses done—eg analyses of subgroups and interactions, and sensitivity analyses                                                                                                                                                                                                            | Page 16 (Table 3);<br>Page 18 (Table 4)                              |
| <b>Discussion</b>        |     |                                                                                                                                                                                                                                                                                                           |                                                                      |
| Key results              | 18  | Summarise key results with reference to study objectives                                                                                                                                                                                                                                                  | Page 18 (line 50-59);<br>Page 19 (line 5-32)                         |
| Limitations              | 19  | Discuss limitations of the study, taking into account sources of potential bias or imprecision. Discuss both direction and magnitude of any potential bias                                                                                                                                                | Page 21 (line 49-59);<br>Page 22 (line 5-50)                         |
| Interpretation           | 20  | Give a cautious overall interpretation of results considering objectives, limitations, multiplicity of analyses, results from similar studies, and other relevant evidence                                                                                                                                | Page 19 (line 34-59);<br>Page 20 (line 5-59);<br>Page 21 (line 5-48) |
| Generalisability         | 21  | Discuss the generalisability (external validity) of the study results                                                                                                                                                                                                                                     | Page 22 (line 9-50)                                                  |
| <b>Other information</b> |     |                                                                                                                                                                                                                                                                                                           |                                                                      |

1  
2  
3  
4  
5  
6  
7  
8  
9  
10  
11  
12  
13  
14  
15  
16  
17  
18  
19  
20  
21  
22  
23  
24  
25  
26  
27  
28  
29  
30  
31  
32  
33  
34  
35  
36  
37  
38  
39  
40  
41  
42  
43  
44  
45  
46

|         |    |                                                                                                                                                               |                                             |
|---------|----|---------------------------------------------------------------------------------------------------------------------------------------------------------------|---------------------------------------------|
| Funding | 22 | Give the source of funding and the role of the funders for the present study and, if applicable, for the original study on which the present article is based | Page 23 (line 53-59);<br>Page 24 (line 5-9) |
|---------|----|---------------------------------------------------------------------------------------------------------------------------------------------------------------|---------------------------------------------|

\*Give information separately for cases and controls in case-control studies and, if applicable, for exposed and unexposed groups in cohort and cross-sectional studies.

**Note:** An Explanation and Elaboration article discusses each checklist item and gives methodological background and published examples of transparent reporting. The STROBE checklist is best used in conjunction with this article (freely available on the Web sites of PLoS Medicine at <http://www.plosmedicine.org/>, Annals of Internal Medicine at <http://www.annals.org/>, and Epidemiology at <http://www.epidem.com/>). Information on the STROBE Initiative is available at [www.strobe-statement.org](http://www.strobe-statement.org).

For peer review only

# BMJ Open

## Patients' preferences for health insurance coverage of new technologies for treating chronic diseases in China: a discrete choice experiment

|                                 |                                                                                                                                                                                                                                                                                                                                                                                                                                                                                                                                                                                                                                                          |
|---------------------------------|----------------------------------------------------------------------------------------------------------------------------------------------------------------------------------------------------------------------------------------------------------------------------------------------------------------------------------------------------------------------------------------------------------------------------------------------------------------------------------------------------------------------------------------------------------------------------------------------------------------------------------------------------------|
| Journal:                        | <i>BMJ Open</i>                                                                                                                                                                                                                                                                                                                                                                                                                                                                                                                                                                                                                                          |
| Manuscript ID                   | bmjopen-2020-038051.R1                                                                                                                                                                                                                                                                                                                                                                                                                                                                                                                                                                                                                                   |
| Article Type:                   | Original research                                                                                                                                                                                                                                                                                                                                                                                                                                                                                                                                                                                                                                        |
| Date Submitted by the Author:   | 15-Jun-2020                                                                                                                                                                                                                                                                                                                                                                                                                                                                                                                                                                                                                                              |
| Complete List of Authors:       | Geng, JinSong; Nantong University Medical School, Department of Medical Informatics<br>Chen, Xiaowei; Nantong University Medical School, Department of Medical Informatics; Zhejiang University School of Medicine First Affiliated Hospital, Library and Reference Department<br>Bao, Haini; Nantong University Medical School, Department of Medical Informatics<br>Qian, Danmin; Nantong University Medical School, Department of Medical Informatics<br>Shao, Yuting; Tongji University School of Medicine, Department of Ophthalmology<br>Yu, Hao; Harvard Medical School, Department of Population Medicine; Harvard Pilgrim Health Care Institute |
| <b>Primary Subject Heading</b>: | Health policy                                                                                                                                                                                                                                                                                                                                                                                                                                                                                                                                                                                                                                            |
| Secondary Subject Heading:      | Health services research                                                                                                                                                                                                                                                                                                                                                                                                                                                                                                                                                                                                                                 |
| Keywords:                       | Health policy < HEALTH SERVICES ADMINISTRATION & MANAGEMENT, International health services < HEALTH SERVICES ADMINISTRATION & MANAGEMENT, Health & safety < HEALTH SERVICES ADMINISTRATION & MANAGEMENT                                                                                                                                                                                                                                                                                                                                                                                                                                                  |
|                                 |                                                                                                                                                                                                                                                                                                                                                                                                                                                                                                                                                                                                                                                          |

SCHOLARONE™  
Manuscripts



I, the Submitting Author has the right to grant and does grant on behalf of all authors of the Work (as defined in the below author licence), an exclusive licence and/or a non-exclusive licence for contributions from authors who are: i) UK Crown employees; ii) where BMJ has agreed a CC-BY licence shall apply, and/or iii) in accordance with the terms applicable for US Federal Government officers or employees acting as part of their official duties; on a worldwide, perpetual, irrevocable, royalty-free basis to BMJ Publishing Group Ltd ("BMJ") its licensees and where the relevant Journal is co-owned by BMJ to the co-owners of the Journal, to publish the Work in this journal and any other BMJ products and to exploit all rights, as set out in our [licence](#).

The Submitting Author accepts and understands that any supply made under these terms is made by BMJ to the Submitting Author unless you are acting as an employee on behalf of your employer or a postgraduate student of an affiliated institution which is paying any applicable article publishing charge ("APC") for Open Access articles. Where the Submitting Author wishes to make the Work available on an Open Access basis (and intends to pay the relevant APC), the terms of reuse of such Open Access shall be governed by a Creative Commons licence – details of these licences and which [Creative Commons](#) licence will apply to this Work are set out in our licence referred to above.

Other than as permitted in any relevant BMJ Author's Self Archiving Policies, I confirm this Work has not been accepted for publication elsewhere, is not being considered for publication elsewhere and does not duplicate material already published. I confirm all authors consent to publication of this Work and authorise the granting of this licence.

# Patients' preferences for health insurance coverage of new technologies for treating chronic diseases in China: a discrete choice experiment

Jinsong Geng<sup>1\*</sup>, Xiaowei Chen<sup>1,2</sup>, Haini Bao<sup>1</sup>, Danmin Qian<sup>1</sup>, Yuting Shao<sup>3</sup>, Hao Yu<sup>4,5</sup>

<sup>1</sup>Department of Medical Informatics, Nantong University Medical School, Nantong, China

<sup>2</sup>Library and Reference Department, Zhejiang University School of Medicine First Affiliated Hospital, Hangzhou, China

<sup>3</sup>Department of Ophthalmology, Tongji University School of Medicine, Shanghai, China

<sup>4</sup>Department of Population Medicine, Harvard Medical School, Boston, USA

<sup>5</sup>Harvard Pilgrim Health Care Institute, Boston, USA

\*Correspondence: Jinsong Geng, Department of Medical Informatics, Nantong University Medical School, 19 Qixiu Road, Nantong 226001, China; Email [gjs@ntu.edu.cn](mailto:gjs@ntu.edu.cn); Tel: +86 513 85051891; Fax: +86 513 85051876

**Word count: 4790**



## ABSTRACT

### Objectives

Our study aimed to inform insurance decision-making in China by investigating patients' preferences for insurance coverage of new technologies for treating chronic diseases.

### Design

We identified six attributes of new medical technologies for treating chronic diseases and used Bayesian-efficient design to generate choice sets for a discrete choice experiment (DCE). After conducting the DCE, we analyzed the data by mixed logit regression to examine patient-reported preference for each attribute.

### Setting

The DCE was conducted with patients in six tertiary hospitals from four cities in Jiangsu Province.

### Participants

Patients aged 18 years or older with a history of diabetes or hypertension and taking medications regularly for more than one year were recruited (N=408).

### Results

The technology attributes regarding expected gains in health outcomes from the treatment ( $P<0.01$ ), high likelihood of effective treatment ( $P<0.01$ ), and low incidence of serious adverse events ( $P<0.01$ ) were significant, positive predictors of choice by the study patients. Out-of-pocket costs was a significant, negative attribute for the entire study sample ( $\beta = -0.258$ ,  $P<0.01$ ) and for the patients with Urban and Rural Residents Basic Health Insurance (URRBMI) ( $\beta = -0.511$ ,  $P<0.01$ ), but not for all the patients with Urban Employees Basic Health Insurance (UEBMI) ( $\beta = -0.071$ ,  $P>0.05$ ). Severity of target disease was valued by patients with lower EQ-5D-5L index value as well as URRBMI enrollees.

### Conclusions

Patients valued most the health benefits and risks of new technologies, which were

1  
2  
3  
4  
5 closely related to their own feelings of disease and perceptions of health-related quality  
6  
7 of life. However, there existed heterogeneity in preferences between URRBMI and  
8  
9 UEBMI patients. Further efforts should be made to reduce the gap between insurance  
10  
11 schemes and make safe and cost-effective new technologies as priority for health  
12  
13 insurance reimbursement.  
14  
15

16 **Keywords:** discrete choice experiment, patient preferences, chronic diseases, health  
17  
18 insurance  
19  
20  
21  
22  
23  
24  
25  
26  
27  
28  
29  
30  
31  
32  
33  
34  
35  
36  
37  
38  
39  
40  
41  
42  
43  
44  
45  
46  
47  
48  
49  
50  
51  
52  
53  
54  
55  
56  
57  
58  
59  
60

## Strengths and limitations of this study

- Our study provides evidence regarding patients' preferences for insurance coverage of new technologies for treating chronic diseases and will be helpful for applying a patient-centered approach to policy-making.
- We identified differential preferences among chronic disease patients with different types of social health insurance, and different levels of health-related quality of life in China.
- Since our sample was from one wealthy province in China, future studies of nationally representative samples are needed.
- While this study focused on hypertension and diabetes, two of the most prevalent chronic diseases, future studies need to examine other types of chronic diseases.

## INTRODUCTION

Non-communicable chronic diseases (chronic diseases) are health conditions or diseases with long-term accumulation, non-self-healing, and difficult to cure. Nowadays, the prevalence and mortality of chronic diseases are on the rise around the world.<sup>1</sup> Chronic diseases present a particularly daunting challenge to China. It was estimated that among Chinese adults aged 35 to 75 years, nearly half had hypertension.<sup>2</sup> The overall prevalence of diabetes in Chinese adults was about 10.9%.<sup>3</sup> Furthermore, comorbidities are highly prevalent among patients with chronic diseases, which have a negative impact on the patient's quality of life and impede the efficacy of treatment.<sup>4-6</sup> Chronic diseases lead to heavy financial burden on patients' families and health insurance programs. It was estimated that the total economic burden associated with chronic diseases in China over the period 2010-2030 could be as high as US\$16 trillion (measured in 2010 US Dollars).<sup>7</sup> Further adding to the challenges to China's health insurance programs' financing capacity, new technologies for treating chronic diseases continue to enter the market, which can be very expensive and contribute to rising healthcare costs. Deciding on which new technology to cover and by which insurance program has become a key issue facing policy-makers in China in the context of universal health insurance coverage.

As part of its goal of providing timely, acceptable and affordable basic healthcare of appropriate quality to its residents, China successfully achieved universal health insurance coverage in 2011, increasing demand for and expenditures on healthcare. China's total health expenditures grew at an average annual rate of 12.2% in 2008-2017, much higher than its GDP's average annual growth rate (8.1%).<sup>8</sup> In recent years, Chinese policy-makers have struggled to keep a balance between expenditure control and meeting patients' demand for healthcare, including the demand for new technologies by patients with chronic diseases. China's National Healthcare Security Administration is promoting the health insurance payment based on diagnosis-related groups (DRGs), a patient classification for standardizing payment in the national health

1  
2  
3  
4  
5 insurance schemes. Accordingly, medical fees and insurance payments will be based on  
6 DRG classification, which includes chronic diseases such as diabetes and hypertension.<sup>9</sup>  
7

8  
9 After China reached universal health insurance coverage, there were still  
10 considerable disparities in benefit coverage and reimbursement ratio among the three  
11 major public insurance programs that together covered more than 95% of Chinese  
12 people, including New Rural Cooperative Medical Scheme (NRCMS), Urban Residents  
13 Basic Health insurance (URBMI), and Urban Employees Basic Health insurance  
14 (UEBMI). For details of differences in health insurance eligibility, premiums and  
15 benefits among the three programs, see the paper published by Yu.<sup>10</sup> Generally  
16 speaking, UEBMI has the best benefit package and the lowest out-of-pocket costs  
17 among the three public insurance programs,<sup>11 12</sup> and UEBMI enrollees had higher  
18 likelihood of healthcare utilization.<sup>13</sup> To improve administrative efficiency and reduce  
19 inequality in insurance benefits, China State Council issued the policy in January 2016  
20 on merging the NRCMS and URBMI to form the Urban Rural and Residents Basic  
21 Health Insurance (URRBMI).<sup>14</sup> While the newly formed URRBMI helped equalize  
22 insurance benefits between urban and rural residents, gaps remained between URRBMI  
23 and UEBMI. For example, according to the 2018 statistical bulletin issued by China's  
24 National Healthcare Security Administration, the average per capita hospitalization cost  
25 for inpatients was 11,181 CNY (about US\$1704) for UEBMI enrollees, and 6577 CNY  
26 (about US\$1003) for URRBMI enrollees.<sup>15</sup> The average inpatient reimbursement ratio  
27 for UEBMI enrollees was 71.8%, and the reimbursement ratio for URRBMI enrollees  
28 was 56.1%.<sup>15</sup> Even among the UEBMI enrollees, insurance benefit is not equal since  
29 some of the enrollees enjoy civil servant subsidies.<sup>16</sup> For example, if the medical  
30 expenditure exceeds the ceiling of health insurance reimbursement, outpatients and  
31 inpatients that enjoy civil servant subsidies may still be subsidized by 70% and 80%  
32 respectively for the exceeding parts.<sup>17</sup> Whereas disparities in China's insurance  
33 programs and patient's utilization of healthcare have been well-documented in the  
34 literature, no studies have yet examined whether patient preferences for new medical  
35  
36  
37  
38  
39  
40  
41  
42  
43  
44  
45  
46  
47  
48  
49  
50  
51  
52  
53  
54  
55  
56  
57  
58  
59  
60

1  
2  
3  
4  
5  
6  
7  
8  
9  
10  
11  
12  
13  
14  
15  
16  
17  
18  
19  
20  
21  
22  
23  
24  
25  
26  
27  
28  
29  
30  
31  
32  
33  
34  
35  
36  
37  
38  
39  
40  
41  
42  
43  
44  
45  
46  
47  
48  
49  
50  
51  
52  
53  
54  
55  
56  
57  
58  
59  
60

technology vary by type of insurance. This study aimed to fill the gap.

Patient-reported outcome measures, such as health-related quality of life (HRQoL), are useful for understanding the impact of disease on their functional status and well-being.<sup>18</sup> EQ-5D series are among the most widely used multi-attribute utility instruments to measure HRQoL. EQ-5D-5L uses a health-state classification system which defines health in 5 areas,<sup>19</sup> has been proved to have the validity and discriminatory power to measure HRQoL in patients with chronic diseases.<sup>20-22</sup> Although HRQoL is an essential measure of health status to inform public health and health policy, whether patients' preferences on reimbursement differ from HRQoL remains unclear.

Eliciting patients' preferences and involving patients in health insurance decision-making can be helpful to increase satisfaction of patients and is an integral part of patient-centered care, which is defined as providing care that is respectful of, and responsive to individual patient preferences, needs and values.<sup>23</sup> Although patient-centered approach and value-based care has been long advocated in China, there still a lack of evidence from patients that reflect their preferences to inform health insurance coverage decision-making. This study added new information to the literature by conducting a discrete choice experiment (DCE), which is an attribute-based method to measure the preferences and trade-off of responders and becomes a recognized scientific approach to elicit preferences.<sup>24</sup> Prior research showed that DCE was fruitful and reliable to effectively improve healthcare decision-making.<sup>25</sup> Our DCE focused on chronic disease patients, and its goal was to support evidence-informed insurance policy-making in China. Specifically, we used the DCE data to test the following hypotheses: (1) new technology attributes regarding health benefits are more important than other attributes for health insurance coverage; (2) patients' preferences differ by type of disease and type of insurance.

## METHODS

### Identification of technology attributes and levels

Our DCE design, implementation, and analysis followed the user guide developed jointly by the World Bank, World Health Organization, and U.S. Agency for International Development.<sup>26</sup> We used a three-step approach to complete the preliminary stage of DCE, which aimed to identify and define the attributes and levels of new medical technologies. First, a systematic review was conducted to select attributes which were often used in multi-criteria decision analyses of health insurance decision-making. The systematic review was performed according to the framework for evidence-based decision-making as defined by EVIDEM.<sup>27</sup> We found that the most commonly mentioned dimensions were comparative outcomes (effectiveness, safety/tolerability), economic consequences (costs and cost-effectiveness) and needs of new technologies (severity of target disease, size of affected population, unmet needs related to the already reimbursed technologies), and knowledge of new technologies (quality of evidence, expert consensus/clinical practice guideline). Results of these findings were published in a separate paper.<sup>28</sup>

Second, both focus group discussions with physicians and expert consultation were carried out to determine attributes used in our research. There was no consensus among physicians about the criteria to determine the level of attributes of new technologies to treat diabetes and hypertension in our evidence-based clinical practice workshop. Then, we did focus group discussion and expert consultation on attributes and levels regarding reimbursement of new medical technologies. 14 experts (from 6 provinces in China) in reimbursement, health economics, healthcare service and evidence-based medicine were consulted. Results were published in another separate paper.<sup>29</sup> Criteria regarding needs of the technology (severity, benefit type of technology, unmet needs of reimbursed technology), comparative outcomes (effectiveness, safety/tolerability, patient-perceived/patient-reported outcomes), and economic aspects of the technology

1  
2  
3  
4  
5 (costs and cost-effectiveness) were needed in health insurance reimbursement  
6  
7 decision-making. We also searched the famous health technology assessment database  
8  
9 established by Canadian Agency for Drugs and Technologies in Health (CADTH) to  
10  
11 select potential new technologies and find reasons for recommendation of  
12  
13 reimbursement to better define the levels of attributes. We found 68 reports regarding  
14  
15 hypertension and diabetes which were published before March 2018. Data extraction  
16  
17 form was developed and attributes of new technologies were extracted. We further  
18  
19 searched the database founded by China National Medical Products Administration  
20  
21 (NMPA, formerly China Food and Drug Administration or CFDA) according to the  
22  
23 generic name of new technologies to see if they were approved and available in China.  
24  
25 We also referred to the list published by city governments in Jiangsu Province about the  
26  
27 medical technologies which were already covered by the public health insurance  
28  
29 programs. After completing the database search, we defined new medical technologies  
30  
31 in this study as the therapeutics for hypertension and diabetes, which had been marketed  
32  
33 in China but were not covered by the public health insurance programs in Jiangsu in  
34  
35 2018. We determined the range of out-of-pocket costs according to the retail price of  
36  
37 new technologies.

38       Attributes and levels of new medical technologies which were used in our research  
39  
40 were listed in Table 1. Details of the explanation of attributes and levels were shown in  
41  
42 Appendix 1.  
43  
44  
45  
46  
47  
48  
49  
50  
51  
52  
53  
54  
55  
56  
57  
58  
59  
60



**Table 1. Attributes and levels of new medical technology in the DCE**

| Attributes                                              | Levels                                    | Variables coding |
|---------------------------------------------------------|-------------------------------------------|------------------|
| Expected gains in health outcomes from the treatment    | Not as expected; As expected              | Binary           |
| Likelihood of effective treatment                       | 30%-90%                                   | Continuous       |
| Severity of target disease                              | Not severe; Severe but not lethal; Lethal | Categorical      |
| Incidence of serious adverse events                     | Often; Occasionally; Never or rarely      | Categorical      |
| Alternative technologies currently covered by insurance | Yes; No                                   | Binary           |
| Out-of-pocket costs per month (if not reimbursed)       | CNY 300-3500                              | Continuous       |

Note: New medical technologies which were mentioned in our research were already in use in clinical practice. However, they had not yet been included in the catalogs of social health insurance including Urban and Rural Residents Basic Health Insurance (URRBMI) and Urban Employees Basic Health Insurance (UEBMI).

The average exchange rate of US Dollars to Chinese Yuan (CNY) in 2018 was about 6.56. Therefore, CNY 300 was approximately US\$46; CNY 3500 were about US\$533.

## Experimental design and development of the questionnaire

D-efficiency experimental design that maximized the precision of estimated choice-model parameters for a given number of choice questions<sup>30</sup> was created by Ngene1.1.2 software (Choice-Metrics, Sydney, Australia). Prior coefficients were set to zero during the pilot. After obtaining priors of the attributes from the pilot, Bayesian-efficient design was used to generate the final choice sets, which consisted of 30 pairs of scenarios and were divided into five blocks, with six pairs in each block. Blocking mainly ensures that the level balance of attributes within each block is satisfied, so that respondents are not only faced with low or high attribute levels for a certain attribute.

We chose unlabeled over labeled DCE. Unlabeled DCE was widely used to investigate patients' preferences for treatment techniques.<sup>31-33</sup> Respondents of unlabeled DCEs found that they were not subject to the psychological cues of the technology labels, thus reflecting the real-world choice situation.<sup>34</sup> In addition, in our research, new medical technologies to treat chronic disease continue to emerge. Therefore, an unlabeled DCE was considered appropriate for our study. The forced choice sets were

1  
2  
3  
4  
5 used in our DCE because when no option had a definitive advantage, it was assumed  
6 that forced choice under preference uncertainty would favor options that were easier to  
7 justify and associated with a lower likelihood of error and regret, such as compromise  
8 and asymmetrically dominating options.<sup>35</sup>  
9  
10

11  
12 Examples of scenarios were shown in Appendix 2. Our final questionnaire  
13 contained two sections. Section A listed questions regarding participants'  
14 socio-demographic characteristics, past medical history, reasons for hospital visit, and  
15 health insurance information, EQ-5D-5L dimensions and levels. EQ-5D-5L used a  
16 health-state classification system defining health in 5 dimensions, mobility, self-care,  
17 usual activities, pain/discomfort, and anxiety/depression. Each of the 5 dimensions was  
18 divided into five levels of perceived problems, no problem, mild problems, moderate  
19 problems, severe problems, and unable to/extreme problems. Section B was the DCE  
20 task.  
21  
22  
23  
24  
25  
26  
27  
28  
29

## 30 **DCE implementation and data collection**

31  
32  
33  
34 Our DCE was carried out from September 15<sup>th</sup> to October 15<sup>th</sup>, 2018 in six tertiary  
35 public hospitals from four cities in Jiangsu Province. Due to the high prevalence,  
36 serious complications and heavy burden of hypertension and diabetes, we selected  
37 patients with these diseases as participants. Inclusion criteria for patients including  
38 those aged 18 years or older, participating in a social health insurance program, with a  
39 history of diabetes or hypertension, and taking medications regularly for more than one  
40 year. Patients were enrolled consecutively during the study period.  
41  
42  
43  
44  
45  
46

47 There was no general standard on the ideal sample size required for a DCE<sup>36</sup>.  
48 Generally speaking, a less efficient design may also require a larger sample size,  
49 resulting in increased costs.<sup>37</sup> Estimates of the sample size were usually determined on  
50 the basis of previous research, rules of thumb and budget constraints. DCE studies  
51 showed that reliable models could be estimated in samples with more than 50  
52 participants.<sup>38 39</sup>  
53  
54  
55  
56  
57  
58  
59  
60

1  
2  
3  
4  
5 The DCE questionnaires were administered through one-to-one, face-to-face  
6 interviews to ensure validity and quality of the investigation. Our interviewers consisted  
7 of 13 medical students, all of whom were in hospitals doing their internships during the  
8 research period. For quality assurance, the interviewers were trained before the  
9 experiment. We compiled a survey training manual, provided detailed descriptions of  
10 how to interpret each scenario, and asked each interviewer to make explanations to  
11 patients. The interviewers were required to check whether the entire questionnaire was  
12 complete immediately after each interview. If any information was missing, they had to  
13 go back to ask patients to provide the information on site. For patients with blurred  
14 vision or illiteracy, the interviewers explained the meaning of the questionnaire item by  
15 item until the patients fully understood each item. Patients were asked about how  
16 confident they felt in completing the choice sets. The score of confidence ranged from 0  
17 (not confident at all) to 10 (extremely confident) (Appendix 3). We excluded the DCE  
18 questionnaire with a score of less than 8.  
19  
20  
21  
22  
23  
24  
25  
26  
27  
28  
29  
30  
31  
32

### 33 **Patient involvement**

34  
35  
36 Patients participated in both the pilot and formal DCE survey. Verbal informed  
37 consent was obtained from all patients prior to both the pilot and the final survey.  
38 Patients were made aware that the participation in the survey was voluntary. All data  
39 and information collected from patients were anonymous. The pilot survey included 90  
40 patients with diabetes or hypertension. Intelligibility, acceptability and reliability of the  
41 questionnaire were tested during the pilot. At the beginning of the pilot, we found that  
42 several patients were illiterate, and a few patients with diabetes were nearly invisible.  
43 Then, the detailed description for the choice sets was made and interviewers were  
44 required to read and explain the description to these patients with enough patience.  
45 Patients thought the questionnaire was clear. After the pilot was finalized, we conducted  
46 the formal survey. During the pilot and formal survey, patients had to make a decision  
47 based on the assumption that only one technology can be covered due to limited health  
48  
49  
50  
51  
52  
53  
54  
55  
56  
57  
58  
59  
60

1  
2  
3  
4  
5 insurance funds. They were asked to think carefully and trade-off between two new  
6 medical technologies. The survey time ranged from 20 minutes to one hour. We  
7 prepared a packed cotton towel for each patient as a gift (CNY 10, or US\$1.4).  
8  
9 Summary of main findings will be sent to the study participants who wish to be  
10 informed.  
11  
12  
13  
14  
15  
16

## 17 Data analysis

18  
19  
20 Our empirical analysis of the DCE data was based on the random utility model.  
21 Like prior research,<sup>26</sup> we considered the utility,  $U$ , that patient,  $i$ , assigned to choice,  $j$ ,  
22 from  $J$  alternative choices, as the sum of two parts: utility component and random  
23 component. The equation was developed as follows:  
24  
25  
26  
27

$$28 U_{ij} = V_{ij} + \varepsilon_{ij} = \beta_0 + \beta_1 x_{1ij} + \beta_2 x_{2ij} + \dots + \beta_m x_{mij} + \varepsilon_{ij}$$

29 where  $V_{ij}$  was the utility component determined by patients' preferences of attributes  
30 ( $x_1, \dots, x_m$ ),  $\varepsilon_{ij}$  was the random component which was a function of unobserved attributes  
31 and individual-level variation, and  $\beta$  quantified the strength of preference for each  
32 attribute level.<sup>26</sup>  
33  
34  
35  
36  
37

38 We implemented the above equation by estimating mixed logit regression using  
39 STATA 14.2 SE (StatCorp LP, College Station, Texas, USA) and was specified with  
40 500 Halton draws. Mixed logit model allows for unknown heterogeneity in individual  
41 preferences and estimates both the mean preference weight and the standard deviation.  
42 We assumed that all variables of the attributes, except for the constant, had a random  
43 component and that the weights of preference were normally distributed. The choice of  
44 patients was the dependent variable, and the selected technology attributes were  
45 independent variables. Dummy coding was used for categorical variables of our DCE  
46 data. For dummy variable coding, each model-estimated coefficient is a measure of the  
47 strength of preference of that level relative to the omitted level of that attribute.<sup>40 41</sup>  
48  
49  
50  
51  
52  
53  
54  
55  
56  
57

58 Subgroup analysis was performed by type of disease, type of insurance, HRQoL, and  
59  
60

1  
2  
3  
4  
5 gender. In each regression model, attribute level with a negative coefficient indicates  
6 that patients would prefer not to move from the reference level to that level, while an  
7 attribute level with a positive coefficient indicates that patients would prefer to move to  
8 that level from the reference level.<sup>38</sup>  
9  
10  
11  
12  
13  
14  
15

## 16 RESULTS

### 17 Characteristics of patients

18  
19  
20  
21  
22 A total of 410 patients were consented to take part in the DCE survey, and the data  
23 from 408 patients were available for analysis with two patients excluded from the  
24 analysis due to non-compliance with the inclusion criteria, incomplete data and not  
25 confident. The mean score for confidence was 8.80 (95%CI 8.69-8.90), which  
26 suggested patients were confident in their choice. For details about number of patients  
27 in each sample hospital, see Appendix 4.  
28  
29  
30  
31  
32

33 Table 2 presented demographic and clinical characteristics of the included patients.  
34 The sample had more males than females (53.92% vs. 46.08%). The patients had a  
35 mean age of 62.34 years (ranging from 28 to 96 years). They were almost evenly split  
36 between UEBMI and URRBMI (49.26% vs. 50.73%). Most of the patients had  
37 hypertension (63.97%) with 14.22% of them having both hypertension and diabetes  
38 while 21.81% of them had diabetes only. There was no statistically significant  
39 difference between hypertension and diabetes patients in terms of insurance types  
40 (UEBMI vs URRBMI, P=0.392) and benefits (UEBMI with extra benefit vs UEBMI  
41 without extra benefit, P=0.598) (Appendix 5). Among the 180 patients who had chronic  
42 comorbid conditions other than hypertension and diabetes, cardiovascular disease was  
43 the most common comorbidity (98 patients) (Appendix 6).  
44  
45  
46  
47  
48  
49  
50  
51  
52  
53  
54  
55  
56  
57  
58  
59  
60

**Table 2. Characteristics of patients (n=408)**

| Characteristics                                          | n (%)       |
|----------------------------------------------------------|-------------|
| <b>Gender</b>                                            |             |
| Male                                                     | 220 (53.92) |
| Female                                                   | 188 (46.08) |
| <b>Age groups</b>                                        |             |
| 18~45                                                    | 30 (7.35)   |
| 45~59                                                    | 131 (32.11) |
| 60~74                                                    | 184 (45.10) |
| ≥75                                                      | 63 (15.44)  |
| <b>Urban vs. rural household registration</b>            |             |
| Urban                                                    | 210 (51.47) |
| Rural                                                    | 198 (48.53) |
| <b>Education</b>                                         |             |
| Unschooling                                              | 39 (9.56)   |
| Primary school                                           | 108 (26.47) |
| Junior high school                                       | 110 (26.96) |
| High school                                              | 89 (21.81)  |
| Junior college or higher vocational college              | 31 (7.60)   |
| Bachelor's degree or above                               | 31 (7.60)   |
| <b>Employment</b>                                        |             |
| Farmer                                                   | 105 (25.74) |
| Urban employee                                           | 140 (34.31) |
| Retiree                                                  | 112 (27.45) |
| Freelancers                                              | 32 (7.84)   |
| Unemployed                                               | 19 (4.66)   |
| <b>Type of insurance<sup>#</sup></b>                     |             |
| UEBMI                                                    | 201 (49.26) |
| URRBMI                                                   | 207 (50.74) |
| <b>Family monthly income (CNY)<sup>Δ</sup></b>           |             |
| < 2000                                                   | 83 (20.34)  |
| 2001~4000                                                | 81 (19.85)  |
| 4001~6000                                                | 93 (22.79)  |
| 6001~8000                                                | 69 (16.91)  |
| 8001~10000                                               | 41 (10.05)  |
| >10000                                                   | 41 (10.05)  |
| <b>Type of patients</b>                                  |             |
| Outpatients                                              | 83 (20.34)  |
| Inpatients                                               | 325 (79.66) |
| <b>Type of chronic diseases</b>                          |             |
| Hypertension                                             | 261 (63.97) |
| Diabetes                                                 | 89 (21.81)  |
| Both                                                     | 58 (14.22)  |
| <b>Comorbidities other than hypertension or diabetes</b> |             |
| Yes                                                      | 180 (44.12) |
| No                                                       | 228 (55.88) |
| <b>EQ-5D-5L index value<sup>*</sup></b>                  |             |
| ≤0.8                                                     | 127         |
| >0.8                                                     | 281         |

<sup>#</sup>1 UEBMI patients, 6 URRBMI patients also enrolled in commercial health insurance

1  
2  
3  
4  
5  
6  
7  
8  
9  
10  
11  
12  
13  
14  
15  
16  
17  
18  
19  
20  
21  
22  
23  
24  
25  
26  
27  
28  
29  
30  
31  
32  
33  
34  
35  
36  
37  
38  
39  
40  
41  
42  
43  
44  
45  
46  
47  
48  
49  
50  
51  
52  
53  
54  
55  
56  
57  
58  
59  
60

^ The average exchange rate between US Dollars and Chinese Yuan (CNY) in 2018 was 6.56.

\*The utility index was derived from the Chinese value sets.<sup>42</sup> Currently, the well accepted threshold of the EQ-5D-5L index value still lacks. However, in most cases, the EQ-5D-5L index value for patients with serious complications of diabetes and hypertension was equal to or less than 0.8, as shown by studies carried out in China.<sup>20 22</sup> EQ-5D-5L index value  $\leq 0.8$  group: Median 0.6718, IQR -0.0818~0.7998; EQ-5D-5L index value  $> 0.8$  group: Median 0.9507, IQR 0.8410~1.

## Regression analysis of the DCE data

Our analysis found that the study patients valued most the new technologies with never or rare incidence of serious adverse events ( $\beta = 0.884$ ,  $P < 0.01$ ), followed by the expected gains in health outcomes from the treatment ( $\beta = 0.809$ ,  $P < 0.01$ ) (Table 3). Likelihood of effective treatment was also a significant, positive predictor of patients' choice of new technologies ( $\beta = 0.455$ ,  $P < 0.01$ ) while out-of-pocket costs was a significant, negative predictor of patients' choice ( $\beta = -0.258$ ,  $P < 0.01$ ). In comparison, whether there were alternative technologies currently covered by insurance seemed not to be an important factor for the patients ( $P > 0.05$ ).

## Subgroup analysis by type of disease

Appendix 7 presented the results from the subgroup analysis by type of disease (hypertension versus diabetes). While the two groups had similar results, there were two notable differences. One was that, although out-of-pocket costs remained a significant, negative predictor, their coefficient for hypertension patients was -0.178 ( $P < 0.05$ ), not as important as it was for patients with diabetes ( $\beta = -0.395$ ,  $P < 0.01$ ). The other was that the expected gains in health outcomes from the treatment seemed to be more important for diabetes patients ( $\beta = 0.965$ ,  $P < 0.01$ ) when compared with those who only had hypertension ( $\beta = 0.716$ ,  $P < 0.01$ ).

**Table 3. DCE results from mixed logit model**

| Attributes                                              | All patients    |                |
|---------------------------------------------------------|-----------------|----------------|
|                                                         | Mean(SE)        | SD(SE)         |
| Expected gains in health outcomes from the treatment    |                 |                |
| <i>Not as expected (reference)</i>                      |                 |                |
| <i>As expected</i>                                      | 0.809**(0.123)  | 0.554* (0.275) |
| Increasing likelihood of effective treatment (per 10%)  | 0.455**(0.044)  | 0.375**(0.055) |
| Severity of target disease                              |                 |                |
| <i>Not severe (reference)</i>                           |                 |                |
| <i>Severe</i>                                           | 0.291*(0.123)   | 0.316(0.431)   |
| <i>Lethal</i>                                           | 0.208(0.147)    | 1.264**(0.199) |
| Incidence of serious adverse events                     |                 |                |
| <i>Often (reference)</i>                                |                 |                |
| <i>Occasionally</i>                                     | 0.575**(0.116)  | 0.035(0.694)   |
| <i>Never or rarely</i>                                  | 0.884**(0.142)  | 0.900(0.206)   |
| Alternative technologies currently covered by insurance |                 |                |
| <i>Yes (reference)</i>                                  |                 |                |
| <i>No</i>                                               | 0.087(0.104)    | 0.095(0.501)   |
| Out-of-pocket costs (thousand CNY per month increase)   | -0.258**(0.061) | 0.898**(0.090) |
| Log likelihood                                          |                 | -1485.761      |
| Participants                                            |                 | 408            |
| Observations                                            |                 | 4896           |

\*P<0.05; \*\*P<0.01; SD: Standard Deviation estimates reflect preference heterogeneity in the participants; SE: Standard Error

### Subgroup analysis by type of insurance

Appendix 8 summarized the subgroup analyses by type of insurance. The expected gains in health outcomes from the treatment, likelihood of effective treatment, and low incidence of serious adverse events were significant, positive predictors of technology choice (P<0.01) for both URRBMI and UEBMI patients. Whether there were alternative technologies currently covered by insurance was statically insignificant for both groups (P>0.05). However, these two groups differed remarkably in two technology attributes. The coefficient of out-of-pocket costs was significant for URRBMI patients ( $\beta = -0.511$ , P<0.01), but not for UEBMI patients ( $\beta = -0.071$ , P>0.05). Severity of target disease also had significant coefficients for URRBMI patients (P<0.01), but not for UEBMI patients.



1  
2  
3  
4  
5 We conducted further analysis of the UEBMI patients by excluding those UEBMI  
6 patients who enjoyed extra health insurance benefits, including who enjoyed public  
7 servant subsidies and the retired veteran cadres, and as indicated by Column (3), we  
8 found that out-of-pocket costs was a meaningful attribute for the remaining UEBMI  
9 patients ( $\beta = -0.211$ ,  $P < 0.05$ ) although not so important as viewed by URRBMI patients  
10 ( $\beta = -0.211$  vs.  $\beta = -0.511$ ). On the other hand, severity of target disease remained  
11 statistically non-significant after excluding those UEBMI patients with extra insurance  
12 benefits.  
13  
14  
15  
16  
17  
18  
19  
20  
21  
22

### 23 **Subgroup analysis by HRQoL**

24  
25 Appendix 9 demonstrated the results from the subgroup analysis by EQ-5D-5L  
26 index value, which was a meaningful measurement for HRQoL. Severity of target  
27 disease, both severe and lethal, was important for patients with EQ-5D-5L index value  
28 less than or equal to 0.8 ( $P < 0.01$ ). However, it was statistically non-significant for  
29 patients with EQ-5D-5L index value higher than 0.8 ( $P > 0.05$ ). Although patients'  
30 preferences for attributes including expected gains in health outcomes from the  
31 treatment, and incidence of serious adverse events were statistically significant for both  
32 groups, they were less important as viewed by the group with lower EQ-5D-5L index  
33 value.  
34  
35  
36  
37  
38  
39  
40  
41

42 Since severity of target disease was an important attribute for URRBMI patients  
43 ( $P < 0.01$ ), but not for UEBMI patients. We did the chi-square test and results showed  
44 that the proportion of patients with lower EQ-5D-5L index value was significantly  
45 higher in URRBMI group ( $P < 0.01$ ) (Appendix 10).  
46  
47  
48  
49  
50  
51

### 52 **Subgroup analysis by gender**

53  
54 We found that patients in both groups valued the new technologies with expected  
55 gains in health outcomes from the treatment, likelihood of effective treatment, low  
56 incidence of serious adverse event, and low out-of-pocket cost ( $P < 0.01$ ) (Appendix 11).  
57  
58  
59  
60

1  
2  
3  
4  
5 However, the differences in preferences for attributes were not obvious between male  
6 and female.  
7  
8  
9  
10  
11  
12

## 13 **DISCUSSION**

### 14 **Summary of the findings**

15  
16  
17 Our study found that key technology attributes, including expected gains in health  
18 outcomes from the treatment, high likelihood of effective treatment, and low incidence  
19 of serious adverse events were significant, positive predictors of patient choice for  
20 health insurance coverage. These results hold for the entire study sample and for the  
21 subgroup analyses.  
22  
23  
24  
25  
26  
27

28 Out-of-pocket costs was a significant, negative predictor for the entire sample,  
29 showing that patients preferences decreased as the out-of-pocket costs increased. We  
30 also found that out-of-pocket costs was a significant, negative predictor for both  
31 hypertension patients and diabetes patients although they were less important for the  
32 former group than for the latter group.  
33  
34  
35  
36  
37

38 When it came to different insurance types, we identified preference heterogeneity  
39 as previous studies of DCE suggested.<sup>43</sup> Specifically, we found that out-of-pocket costs  
40 was a significant, negative predictor for URRBMI patients' preference for insurance  
41 coverage while severity of target disease was a significant, positive predictor for this  
42 group of patients. But neither of these two attributes was a significant predictor for  
43 UEBMI patients. Our further analysis of the UEBMI patients by excluding those  
44 UEBMI patients who enjoyed extra health insurance benefits revealed that the  
45 remaining UEBMI patients regarded out-of-pocket costs as a significant, negative factor  
46 for coverage although severity of target disease stayed statistically insignificant for  
47 them.  
48  
49  
50  
51  
52  
53  
54  
55  
56

57 Patients' HRQoL was measured in our research and results suggested that patients  
58  
59  
60

1  
2  
3  
4  
5 with lower HRQoL tended to prefer new technologies which could have effects on  
6 severe or lethal diseases. The findings on importance of disease severity regarding  
7 patients with lower HRQoL coincide with URRBMI patients. In fact, the reimbursement  
8 level and the hospitalization rate of URRBMI patients were lower than UEBMI  
9 patients.<sup>15</sup> Further analysis showed the relatively higher proportion of URRBMI patients  
10 with lower HRQoL. In addition, our results indicate that gender is not a decisive factor  
11 for the preference of new technologies for reimbursement.  
12  
13  
14  
15  
16  
17

## 18 **Comparison with other studies**

19  
20  
21 Our findings of patients' valuing most the effectiveness and safety of medical  
22 technologies were consistent with the results by prior studies from other countries  
23 which aimed to investigate patients' preferences for the treatment of chronic  
24 diseases.<sup>44-48</sup> Our study confirmed that patients preferred new technologies which could  
25 increase health benefits and minimize potential risks.  
26  
27  
28  
29

30  
31 However, variation in patient preferences existed and mainly depended on patients'  
32 own feelings of the disease. Previous research found that the median hospitalization cost  
33 for patients with hypertension was lower than patients with diabetes,<sup>49 50</sup> which  
34 supported our findings that out-of-pocket costs was not as important for hypertension  
35 patients as they were for patients with diabetes.  
36  
37  
38  
39

40  
41 We also identified preference heterogeneity among patients with different types of  
42 insurance. Although China's successful health insurance expansion during the past  
43 decade led to the country's universal health insurance coverage, variations in benefit  
44 coverage were manifested among different health insurance schemes,<sup>12</sup> resulting in  
45 inequalities in accessibility and affordability of medical services.<sup>51</sup> Such inequalities  
46 affected patient preferences across different types of insurance. For example, we found  
47 that out-of-pocket costs was a significant, negative predictor for URRBMI patients'  
48 preference, but not for all the UEBMI patients in our sample. The finding reflected the  
49 fact that, compared with URRBMI, UEBMI had better benefit coverage and higher  
50 reimbursement level, especially for those UEBMI patients with extra benefits. The  
51  
52  
53  
54  
55  
56  
57  
58  
59  
60

1  
2  
3  
4  
5 finding also fitted into the big picture of disparities across insurance schemes in China  
6 that were illustrated by prior research.

7  
8 We found that URRBMI patients attached importance to severity of disease. We  
9 also found the association between lower HRQoL and preference on technologies  
10 treating severe or lethal disease. Previous studies found that chronic disease patients  
11 with URRBMI had lower health service utilization.<sup>52</sup> Furthermore, URRBMI patients  
12 had significantly higher adjusted in-hospital mortality rate and shorter length of stay  
13 when compared with concurrent UEBMI patients.<sup>53 54</sup> These findings suggested that a  
14 plausible explanation for the importance of severity of disease for URRBMI patients  
15 might be mainly due to their perception of HRQoL and their concern about the potential  
16 severe or lethal consequences of chronic diseases.  
17  
18  
19  
20  
21  
22  
23  
24  
25  
26  
27

## 28 **Implications of the study findings**

29  
30 The rising prevalence of chronic diseases in China has major implications on its  
31 ability to provide timely, acceptable and affordable healthcare service for its citizens. To  
32 meet the demand for new medical technologies for treating chronic diseases, it is  
33 important for China's policy-makers to consider patient preferences when they decide  
34 on insurance coverage of new medical technologies. Specifically our findings that  
35 patients valued most new medical technologies with substantial health benefits and low  
36 risks suggested such technologies should be the priority of health insurance coverage.  
37 Policy-makers are suggested to make evidence-based comparisons among technologies  
38 according to the attributes patients preferred to achieve patient-centered and  
39 evidence-informed reimbursement decision-making.  
40  
41  
42  
43  
44  
45  
46  
47  
48  
49

50 Our findings that out-of-pocket costs was a significant concern for URRBMI  
51 patients but not for all the UEBMI patients suggested that policymakers need to take  
52 further efforts to reduce disparities in benefit coverage and reimbursement level  
53 between these two types of insurance and between subgroups with UEBMI. The efforts  
54 will not only enhance financial protections for URRBMI patients and subgroups within  
55  
56  
57  
58  
59  
60

1  
2  
3  
4  
5 UEBMI patients, but also contribute to China's long-term goal of equalizing benefit  
6 coverage across insurance programs.<sup>10</sup>  
7

8 We found that patients did not care about alternative technologies currently covered  
9 by insurance. However, it is an essential attribute in reimbursement decision-making.  
10 Decision makers need to compare the new technologies with available alternative  
11 technologies and determine whether to cover new medical technologies or obsolete the  
12 alternatives. Policymakers and clinicians may need to implement communication  
13 strategies to improve patients' understanding about the alternative therapies and  
14 reimbursement policies under the current insurance system to increase appropriate use  
15 of the existing therapies.  
16  
17  
18  
19  
20  
21  
22  
23

## 24 **Strengths and limitations**

25  
26 Our study used DCE to elicit preferences from chronic disease patients on  
27 insurance coverage of new medical technologies in China. We identified preference  
28 heterogeneity among patients with different types of insurance. Patients' HRQoL was  
29 measured and the potential impact on preferences for reimbursement of new  
30 technologies was analyzed. Our research was helpful for applying a patient-centered  
31 approach to policy-making and generated evidence that could inform insurance  
32 coverage decision-making.  
33  
34  
35  
36  
37  
38  
39

40 Nevertheless, there are several limitations with our study. First, our samples were  
41 from tertiary hospitals in Jiangsu Province. Those patients who sought medical service  
42 from tertiary hospitals generally have serious and/or complex medical conditions with  
43 higher demand for healthcare services than other patients, and may cautiously consider  
44 the issue of medical insurance coverage and reimbursement. Jiangsu is an eastern,  
45 coastal province and one of the most economically developed regions in China. Future  
46 studies are needed to have a nationally representative sample by including patients at  
47 secondary and primary hospitals, and especially by including the economically  
48 underdeveloped regions in China.  
49  
50  
51  
52  
53  
54  
55  
56

57 Second, our study included patients with a history of diabetes or hypertension. Due  
58  
59  
60

1  
2  
3  
4  
5 to differences in disease nature and characteristics, the results may not represent  
6 preferences from patients with other types of chronic diseases, although prior DCEs<sup>44-48</sup>  
7 made conclusions that were similar to ours in terms of the relative importance of  
8 technology attributes regarding benefits and risks. Future studies need to enroll patients  
9 with other diseases, and performing subgroup analysis to find variations of patient  
10 preferences across different types of diseases.  
11  
12  
13  
14  
15

16 Third, there were only 43 UEBMI patients who enjoyed additional privileges of  
17 health insurance, and the limited sample size prevented us from conducting a separate  
18 analysis of this subgroup. Further research is still needed to focus on these subgroups.  
19  
20  
21  
22

## 23 **CONCLUSION**

24  
25  
26 Chronic disease patients valued most the health benefits and risks of new  
27 technologies, which were closely related to their own perception and feelings.  
28 Policymakers need to consider new technologies with high therapeutic effectiveness and  
29 benefit and low risk for treating chronic diseases as a priority for health insurance  
30 coverage. Further efforts should also be made to reduce the gaps in benefit coverage and  
31 reimbursement level between insurance schemes to promote equal access to healthcare  
32 services in China.  
33  
34  
35  
36  
37  
38  
39  
40  
41  
42

## 43 **Ethics approval**

44  
45 This study, including the patient consent process, was approved by the Medical  
46 Ethics Committee in Affiliated Hospitals of Nantong University (Ethical  
47 Approval-2016031), and conforms to the ethical guidelines of the Declaration of  
48 Helsinki.  
49  
50  
51  
52

## 53 **Acknowledgments**

54  
55 We acknowledge the important contributions of our interviewers who did  
56 one-to-one, face-to-face interviews with the patients. We are also grateful to all the  
57  
58  
59  
60

1  
2  
3  
4  
5 patients for their time and efforts.

6  
7 At the time of drafting the manuscript, Jinsong Geng was a fellow at the  
8 Fellowship in Health Policy and Insurance Research, Department of Population  
9 Medicine, Harvard Medical School and Harvard Pilgrim Healthcare Institute.  
10  
11  
12

### 13 **Author contributions**

14  
15 Geng JS, Chen XW, and Yu H led the design and analysis of the discrete choice  
16 experiment. Geng JS, Chen XW contributed to literature search and data interpretation.  
17  
18 Bao HN, Qian DM, Shao YT contributed to implementing the discrete choice  
19 experiment. Geng JS and Yu H performed statistical analysis and wrote the manuscript.  
20  
21  
22  
23

### 24 **Funding**

25  
26 This work was supported by National Natural Science Foundation of China (Grant  
27 No. 71603138) and Jiangsu Overseas Visiting Scholar Program for University  
28 Prominent Young & Middle-aged Teachers and Presidents.  
29  
30  
31

32 The funders provided financial support for the conduct of the study. The funders  
33 had no role in the design, implementation, data collection and statistical analysis, data  
34 interpretation, or writing of the manuscript.  
35  
36  
37  
38

### 39 **Disclosure**

40  
41 The authors report no conflict of interest in this research.  
42  
43

### 44 **Data sharing statement**

45  
46 Data will be available upon reasonable request to corresponding author.  
47  
48  
49  
50

### 51 **References**

- 52  
53 1. World Health Organization. *Global action plan for the prevention and control of*  
54 *noncommunicable diseases 2013-2020*. Geneva: World Health Assembly, 2013:5-9.  
55  
56 2. Lu J, Lu Y, Wang X, *et al*. Prevalence, awareness, treatment, and control of hypertension in  
57 China: data from 1.7 million adults in a population-based screening study (China PEACE Million  
58 Persons Project). *Lancet* 2017;390:2549-58.  
59  
60

3. Wang L, Gao P, Zhang M, *et al*. Prevalence and ethnic pattern of diabetes and prediabetes in China in 2013. *JAMA* 2017;317:2515-23.
4. Adriaanse MC, Drewes HW, van der Heide I, *et al*. The impact of comorbid chronic conditions on quality of life in type 2 diabetes patients. *Qual Life Res* 2016;25:175-82.
5. Aubert CE, Fankhauser N, Marques-Vidal P, *et al*. Patterns of multimorbidity in internal medicine patients in Swiss university hospitals: a multicentre cohort study. *Swiss Med Wkly* 2019;149:w20094.
6. Wang J, Ma JJ, Liu J, *et al*. Prevalence and risk factors of comorbidities among hypertensive patients in China. *Int J Med Sci* 2017;14:201-12.
7. Bloom DE, Chen S, Kuhn M, *et al*. The economic burden of chronic diseases: estimates and projections for China, Japan, and South Korea. *JEoA* 2018:100163.
8. Yip W, Fu H, Chen AT, *et al*. 10 years of health-care reform in China: progress and gaps in Universal Health Coverage. *Lancet* 2019;394:1192-204.
9. China's National Healthcare Security Administration. *China Healthcare Security Diagnosis Related Groups (CHS-DRG)*. Beijing, 2019:44-46.10. Yu H. Universal health insurance coverage for 1.3 billion people: what accounts for China's success? *Health Policy* 2015;119:1145-52.
11. Li Y, Zhao Y, Yi D, *et al*. Differences exist across insurance schemes in China post-consolidation. *PloS One* 2017;12:e0187100.
12. Xiong X, Zhang Z, Ren J, *et al*. Impact of universal medical insurance system on the accessibility of medical service supply and affordability of patients in China. *PloS One* 2018;13:e0193273.
13. Xian W, Xu X, Li J, *et al*. Health care inequality under different medical insurance schemes in a socioeconomically underdeveloped region of China: a propensity score matching analysis. *BMC Public Health* 2019;19:1373.
14. The State Council of the People's Republic of China. Opinion of the State Council on integrating the basic health insurance system for urban and rural residents, 2016. Available: [http://www.gov.cn/zhengce/content/2016-01/12/content\\_10582.htm](http://www.gov.cn/zhengce/content/2016-01/12/content_10582.htm)
15. China's National Healthcare Security Administration. Statistical Bulletin of National Social Medical Insurance Development in 2018. Available: [http://www.nhsa.gov.cn/art/2019/6/30/art\\_7\\_1477.html](http://www.nhsa.gov.cn/art/2019/6/30/art_7_1477.html)
16. General Office of the State Council of the People's Republic of China. Notice of the General Office of the State Council on transmitting the opinions from the Ministry of Labor and Social Security and the Ministry of Finance on the implementation of medical subsidies for national civil servants, 2000. Available: [http://www.gov.cn/gongbao/content/2000/content\\_60249.htm](http://www.gov.cn/gongbao/content/2000/content_60249.htm)
17. Wuxi No.2 People's Hospital. Medical insurance policy (the latest version of 2020). Available: <https://www.wx2h.com/ywzc/ywzcdetail/index/id/4/tid/6.html>.
18. Makovski TT, Schmitz S, Zeegers MP, *et al*. Multimorbidity and quality of life: systematic literature review and meta-analysis. *Ageing Res Rev* 2019;53:100903.
19. van Reenen M, Janssen B. *EQ-5D-5L user guide: basic information on how to use the EQ-5D-5L instrument*. Rotterdam: EuroQol Research Foundation, 2015.
20. Pan CW, Sun HP, Zhou HJ, *et al*. Valuing health-related quality of life in type 2 diabetes patients in China. *Med Decis Making* 2016;36:234-41.
21. Wang P, Luo N, Tai ES, *et al*. The EQ-5D-5L is more discriminative than the EQ-5D-3L in



1  
2  
3  
4 patients with diabetes in Singapore. *Value Health Reg Issues* 2016;9:57-62.

5 22. Liang Z, Zhang T, Lin T, *et al.* Health-related quality of life among rural men and women  
6 with hypertension: assessment by the EQ-5D-5L in Jiangsu, China. *Qual Life Res* 2019;28:2069-80.

7 23. Institute of Medicine Committee on Quality of Health Care in America. *Crossing the*  
8 *quality chasm: a new health system for the 21st century*. Washington, D.C.: The National Academies  
9 Press, 2001.

10 24. Lancsar E, Fiebig DG, Hole AR. Discrete choice experiments: a guide to model  
11 specification, estimation and software. *Pharmacoeconomics* 2017;35:697-716.

12 25. Clark MD, Determann D, Petrou S, *et al.* Discrete choice experiments in health economics:  
13 a review of the literature. *Pharmacoeconomics* 2014;32:883-902.

14 26. Ryan M, Kolstad J, Rockers P, *et al.* *How to conduct a discrete choice experiment for*  
15 *health workforce recruitment and retention in remote and rural areas: a user guide with case*  
16 *studies*. Geneva:World Health Organization Press, 2012.

17 27. Goetghebeur MM, Wagner M, Khoury H, *et al.* Evidence and value: impact on  
18 DEcisionMaking--the EVIDEM framework and potential applications. *BMC Health Serv Res*  
19 2008;8:270.

20 28. Chen XW, Chen Q, Geng JS, *et al.* The application of multi-criteria decision analysis in  
21 medical insurance reimbursement: a systematic review. *Chinese Health Resources* 2018;21:218-23.

22 29. Geng JS, Chen XW, Yu XL, *et al.* Study on the evidence-based decision-making framework  
23 for reimbursement of new technologies in view of EVIDEM. *Chinese Journal of Health Policy*  
24 2018;11:50-54.

25 30. Hensher DA, Rose JM, Greene WH. *Applied Choice Analysis (2nd Edition)*. Cambridge:  
26 Cambridge University Press, 2015.

27 31. Nichols E, O'Hara NN, Degani Y, *et al.* Patient preferences for nutritional supplementation  
28 to improve fracture healing: a discrete choice experiment. *BMJ Open* 2018;8:e019685.

29 32. van Dijk JD, Groothuis-Oudshoorn CG, Marshall DA, *et al.* An empirical comparison of  
30 discrete choice experiment and best-worst scaling to estimate stakeholders' risk tolerance for hip  
31 replacement surgery. *Value Health* 2016;19:316-22.

32 33. Bhattarai N, McMeekin P, Price CI, *et al.* Preferences for centralised emergency medical  
33 services: discrete choice experiment. *BMJ Open* 2019;9:e030966.

34 34. Kløjgaard ME, Bech M, Søgaard R. Designing a stated choice experiment: the value of a  
35 qualitative process. *J Choice Model* 2012;5:1-18.

36 35. Dhar R, Simonson I. The Effect of Forced Choice on Choice. *JMR* 2003;40:146-60.

37 36. de Bekker-Grob EW, Donkers B, Jonker MF, *et al.* Sample size requirements for  
38 discrete-choice experiments in healthcare: a practical guide. *Patient* 2015;8:373-84.

39 37. Vanniyasingam T, Cunningham CE, Foster G, *et al.* Simulation study to determine the  
40 impact of different design features on design efficiency in discrete choice experiments. *BMJ Open*  
41 2016;6:e011985.

42 38. Oluboyede Y, Ternent L, Vale L, *et al.* Using a discrete-choice experiment to estimate the  
43 preferences of clinical practitioners for a novel non-invasive device for diagnosis of peripheral  
44 arterial disease in primary care. *Pharmacoecon Open* 2019;3:571-81.

45 39. Shanahan M, Seddon J, Ritter A, *et al.* Valuing families' preferences for drug treatment: a  
46 discrete choice experiment. *Addiction* 2020;115:690-99.

- 1  
2  
3  
4  
5  
6  
7  
8  
9  
10  
11  
12  
13  
14  
15  
16  
17  
18  
19  
20  
21  
22  
23  
24  
25  
26  
27  
28  
29  
30  
31  
32  
33  
34  
35  
36  
37  
38  
39  
40  
41  
42  
43  
44  
45  
46  
47  
48  
49  
50  
51  
52  
53  
54  
55  
56  
57  
58  
59  
60
40. Hauber AB, Gonzalez JM, Groothuis-Oudshoorn CG, *et al*. Statistical methods for the analysis of discrete choice experiments: a report of the ISPOR Conjoint Analysis Good Research Practices Task Force. *Value Health* 2016;19:300-15.
41. Kløjgaard ME, Manniche C, Pedersen LB, *et al*. Patient preferences for treatment of low back pain-a discrete choice experiment. *Value Health* 2014;17:390-6.
42. Luo N, Liu G, Li M, *et al*. Estimating an EQ-5D-5L Value Set for China. *Value Health* 2017;20:662-69.
43. de Bekker-Grob EW, Swait JD, Kassahun HT, *et al*. Are healthcare choices predictable? The impact of discrete choice experiment designs and models. *Value Health* 2019;22:1050-62.
44. Brockelmann PJ, McMullen S, Wilson JB, *et al*. Patient and physician preferences for first-line treatment of classical Hodgkin lymphoma in Germany, France and the United Kingdom. *Br J Haematol* 2019;184:202-14.
45. Forsander G, Stallknecht S, Samuelsson U, *et al*. Preferences for treatment among adolescents with Type 1 diabetes: a national study using a discrete choice experiment model. *Diabet Med* 2018;35:621-29.
46. Havrilesky LJ, Lim S, Ehrisman JA, *et al*. Patient preferences for maintenance PARP inhibitor therapy in ovarian cancer treatment. *Gynecol Oncol* 2020 doi: 10.1016/j.ygyno.2020.01.026.
47. Ho KA, Acar M, Puig A, *et al*. What do Australian patients with inflammatory arthritis value in treatment? A discrete choice experiment. *Clin Rheumatol* 2019 doi: 10.1007/s10067-019-04843-4.
48. Thieu VT, Robinson S, Kennedy-Martin T, *et al*. Patient preferences for glucagon-like peptide 1 receptor-agonist treatment attributes. *Patient Prefer Adherence* 2019;13:561-76.
49. Mutowo MP, Lorgelly PK, Laxy M, *et al*. The hospitalization costs of diabetes and hypertension complications in Zimbabwe: estimations and correlations. *J Diabetes Res* 2016;2016:9754230.
50. Rosa MQM, Rosa RDS, Correia MG, *et al*. Disease and economic burden of hospitalizations attributable to diabetes mellitus and its complications: a nationwide study in Brazil. *Int J Environ Res Public Health* 2018;15: E294.
51. Zhao C, Wang C, Shen C, *et al*. China's achievements and challenges in improving health insurance coverage. *Drug Discov Ther* 2018;12:1-6.
52. Xie X, Wu Q, Hao Y, *et al*. Identifying determinants of socioeconomic inequality in health service utilization among patients with chronic non-communicable diseases in China. *PloS One* 2014;9:e100231.
53. Chen H, Shi L, Xue M, *et al*. Geographic variations in in-hospital mortality and use of percutaneous coronary intervention following acute myocardial infarction in China: a nationwide cross-sectional analysis. *J Am Heart Assoc* 2018;7:e008131.
54. Lin X, Cai M, Tao H, *et al*. Insurance status, inhospital mortality and length of stay in hospitalised patients in Shanxi, China: a cross-sectional study. *BMJ Open* 2017;7:e015884.

## Appendix 1: Explanations to attributes and levels

Investigators were required to convey the following definitions to patients:

- ‘Expected gains in health outcomes from the treatment’ means the ideal treatment objectives mentioned in domestic evidence-based guidelines for specific patients can be achieved; ‘Not as expected’ indicates that there can be some treatment effects, however, the ideal treatment targets cannot be fully achieved. This attribute is the qualitative aspect of effectiveness.
- Increasingly probability of the effective treatment: ‘effective treatment’ equals to the attribute ‘gains in health outcomes from the treatment’ in choice sets: a new medical technology which can reach its expected gains in health outcomes is effective. The attribute ‘increasingly probability of the effective treatment’ is the quantitative aspect of effectiveness.
- For the severity of target disease, ‘not severe’ means the target disease of new technology is not fatal and has no impact on patients’ quality of life; ‘severe’ suggests the target disease of new technology is not fatal, however, patients’ quality of life was significantly reduced; ‘lethal’ means the target disease of new technology is fatal and patients will probably die from the disease.
- For incidence of serious adverse events, ‘often’ equals to or a little bit higher than 10%; occasionally was about 3%.
- ‘Serious adverse events’ means life-threatening adverse events caused by the new technology, like severe hypoglycemia, severe hypersensitivity reaction, kidney or liver damage, etc.
- Alternative technologies already reimbursed have similar effectiveness and safety to the new technology (Level: Yes); no alternatives already reimbursed have similar effectiveness and safety to the new technology (Level: No).
- The cost of the technology is the out-of-pocket costs if not reimbursed. The hypothesis is that the technology never been reimbursed unless you make the choice.

**Appendix 2: Examples of DCE choice sets**

Medical interventions A and B are used to treat chronic diseases, and currently they were not covered in the social insurance reimbursement list. If you are forced to make a choice, which intervention should be reimbursed by social insurance? There is no right or wrong answers; please make the choice according to your own opinion.

| Attributes                                                    | New technology A                                                                                                                                 | New technology B                                                                                                                              |
|---------------------------------------------------------------|--------------------------------------------------------------------------------------------------------------------------------------------------|-----------------------------------------------------------------------------------------------------------------------------------------------|
| Expected gains in health outcomes from the treatment          |  <p style="text-align: center;"><b>As expected</b></p>          |  <p style="text-align: center;"><b>Not as expected</b></p> |
| Likelihood of effective treatment                             |  <p style="text-align: center;"><b>30%</b></p>                 |  <p style="text-align: center;"><b>90%</b></p>            |
| Severity of target disease                                    |  <p style="text-align: center;"><b>Severe, not lethal</b></p> |  <p style="text-align: center;"><b>Not severe</b></p>    |
| Incidence of serious adverse events (life-threatening)        |  <p style="text-align: center;"><b>Never or rarely</b></p>    |  <p style="text-align: center;"><b>Often</b></p>         |
| Alternative technologies currently covered by insurance       | <b>Yes</b>                                                                                                                                       | <b>No</b>                                                                                                                                     |
| Out-of-pocket costs for new technology (if not reimbursed)    | <b>1500 CNY per month</b>                                                                                                                        | <b>3500 CNY per month</b>                                                                                                                     |
| Which one should be covered by medical insurance? Your choice | <input type="checkbox"/>                                                                                                                         | <input type="checkbox"/>                                                                                                                      |

### Appendix 3: Evaluation of confidence

The following statements refer to the questions that asked about how confident you feel in completing the choice sets. Please select your confident level from 1 to 10 and give a tick '√' in the score to represent your selection:

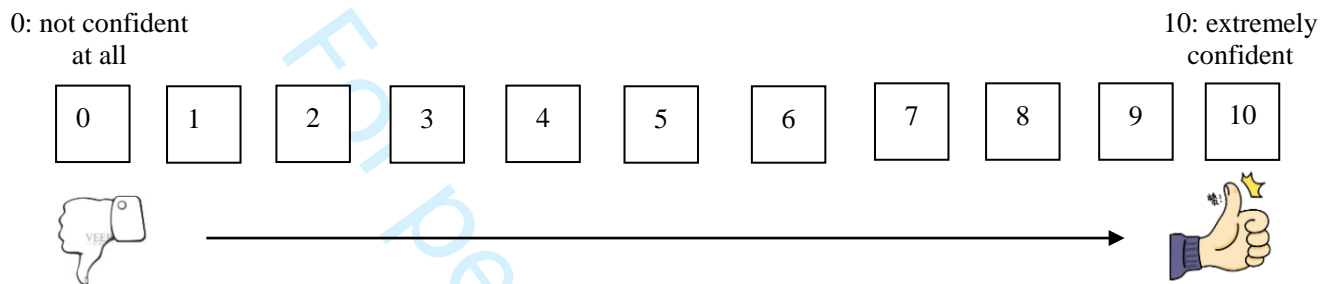

**Appendix 4: Number of patients included in sample hospitals**

Supplemental Table 1 Number of patients in each sample hospital

| Name of hospital                            | City    | Number of patients |
|---------------------------------------------|---------|--------------------|
| Taizhou People's Hospital                   | Taizhou | 60                 |
| Jiangyin People's Hospital                  | Wuxi    | 40                 |
| First People's Hospital of Wujiang District | Suzhou  | 60                 |
| Nantong First People's Hospital             | Nantong | 23                 |
| Nantong Third People's Hospital             | Nantong | 100                |
| Affiliated Hospital of Nantong University   | Nantong | 125                |

## Appendix 5: Distribution of patients by type of disease and type of insurance

Supplemental Table 2. Types of insurance for patients with hypertension and diabetes

| Disease      | URRBMI | UEBMI |
|--------------|--------|-------|
| Hypertension | 130    | 131   |
| Diabetes     | 49     | 40    |
| Total        | 179    | 171   |

Urban and Rural Residents Basic Health Insurance (URRBMI); Urban Employees Basic Health Insurance (UEBMI)

$$\chi^2 = 0.732 \quad P = 0.392$$

Supplemental Table 3. Types of benefits for UEBMI patients with hypertension and diabetes

| Disease      | UEBMI with extra benefits | UEBMI without extra benefits |
|--------------|---------------------------|------------------------------|
| Hypertension | 27                        | 104                          |
| Diabetes     | 11                        | 29                           |
| Total        | 38                        | 133                          |

$$\chi^2 = 0.842 \quad P = 0.359$$

**Appendix 6: Types of chronic commodities for the included patients**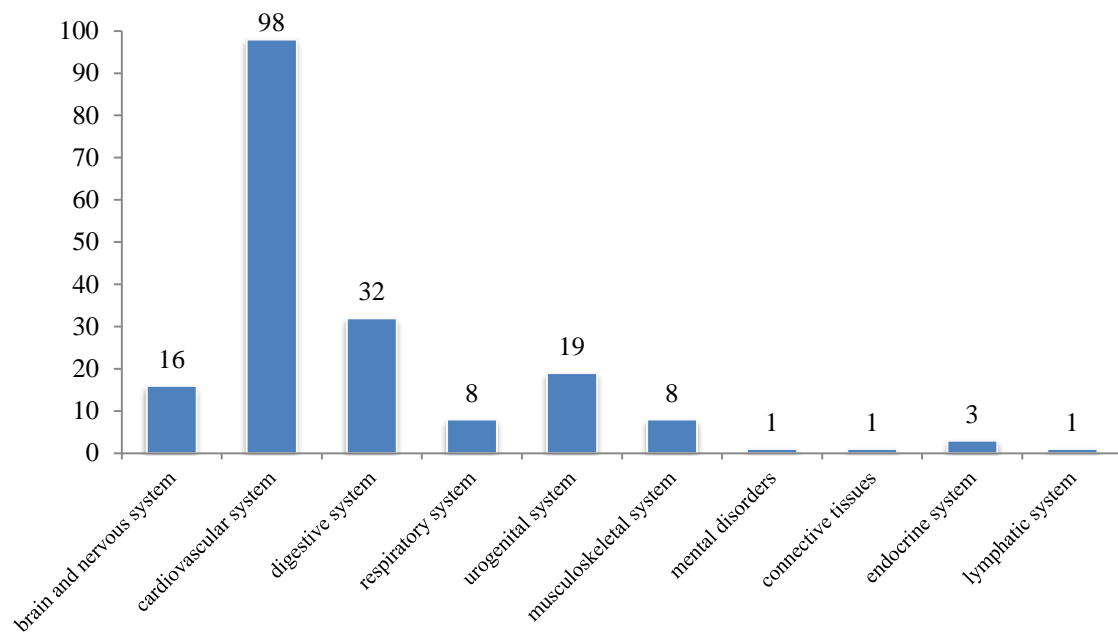

Supplemental Figure 1 Number of patients with chronic commodities



Appendix 7: Subgroup analysis according to disease

Supplemental Table 4. Subgroup analysis according to disease

| Attributes                                              | Hypertension    |                 | Diabetes         |                 |
|---------------------------------------------------------|-----------------|-----------------|------------------|-----------------|
|                                                         | Mean (SE)       | SD (SE)         | Mean (SE)        | SD (SE)         |
| Expected gains in health outcomes from the treatment    |                 |                 |                  |                 |
| <i>Not as expected (reference)</i>                      |                 |                 |                  |                 |
| <i>As expected</i>                                      | 0.716** (0.158) | 0.443(0.496)    | 0.965** (0.259)  | 0.125(0.497)    |
| Increasing likelihood of effective treatment (per 10%)  | 0.519** (0.064) | 0.375** (0.086) | 0.420** (0.093)  | 0.401** (0.119) |
| Severity of target disease                              |                 |                 |                  |                 |
| <i>Not severe (reference)</i>                           |                 |                 |                  |                 |
| <i>Severe</i>                                           | 0.328* (0.162)  | 0.056(0.495)    | 0.100(0.273)     | 0.441(0.834)    |
| <i>Lethal</i>                                           | 0.215(0.196)    | 1.189** (0.276) | 0.304(0.311)     | 1.146** (0.395) |
| Incidence of serious adverse events                     |                 |                 |                  |                 |
| <i>Often (reference)</i>                                |                 |                 |                  |                 |
| <i>Occasionally</i>                                     | 0.767** (0.164) | 0.014* (0.381)  | 0.553* (0.266)   | 0.337(0.548)    |
| <i>Never or rarely</i>                                  | 0.995** (0.195) | 1.126(0.271)    | 0.938** (0.349)  | 0.989* (0.459)  |
| Alternative technologies currently covered by insurance |                 |                 |                  |                 |
| <i>Yes (reference)</i>                                  |                 |                 |                  |                 |
| <i>No</i>                                               | 0.152(0.158)    | 0.978** (0.315) | 0.089(0.248)     | 0.019(0.383)    |
| Out-of-pocket costs (thousand CNY per month increase)   | -0.178* (0.084) | 1.024** (0.128) | -0.395** (0.126) | 0.774** (0.190) |
| Log likelihood                                          |                 | -929.220        |                  | -311.029        |
| Participants                                            |                 | 261             |                  | 89              |
| Observations                                            |                 | 2484            |                  | 2412            |

\*P<0.05; \*\*P<0.01; SD: Standard Deviation estimates reflect preference heterogeneity in the participants; SE: Standard Error  
Patients who had both hypertension and diabetes were excluded to ensure the homogeneity.

## Appendix 8: Subgroup analysis according to insurance types

Supplemental Table 5. Subgroup analysis according to insurance types

| Attributes                                              | (1)<br>URRBMI patients |                 | (2)<br>UEBMI patients |                 | (3)<br>UEBMI patients without extra<br>insurance benefits <sup>#</sup> |                 |
|---------------------------------------------------------|------------------------|-----------------|-----------------------|-----------------|------------------------------------------------------------------------|-----------------|
|                                                         | Mean (SE)              | SD (SE)         | Mean (SE)             | SD (SE)         | Mean (SE)                                                              | SD (SE)         |
| Expected gains in health outcomes from the treatment    |                        |                 |                       |                 |                                                                        |                 |
| <i>Not as expected (reference)</i>                      |                        |                 |                       |                 |                                                                        |                 |
| <i>As expected</i>                                      | 0.977** (0.204)        | 0.811* (0.325)  | 0.732** (0.166)       | 0.320 (0.641)   | 0.652** (0.193)                                                        | 0.609 (0.420)   |
| Increasing likelihood of effective treatment (per 10%)  | 0.512** (0.069)        | 0.384** (0.075) | 0.444** (0.066)       | 0.383** (0.082) | 0.450** (0.074)                                                        | 0.271** (0.085) |
| Severity of target disease                              |                        |                 |                       |                 |                                                                        |                 |
| <i>Not severe (reference)</i>                           |                        |                 |                       |                 |                                                                        |                 |
| <i>Severe</i>                                           | 0.519** (0.189)        | 0.247 (0.887)   | 0.062 (0.171)         | 0.138 (0.609)   | -0.09 (0.194)                                                          | 0.193 (0.615)   |
| <i>Lethal</i>                                           | 0.761** (0.230)        | 1.112** (0.316) | -0.217 (0.211)        | 1.321** (0.289) | -0.385 (0.242)                                                         | 1.387** (0.333) |
| Incidence of serious adverse events                     |                        |                 |                       |                 |                                                                        |                 |
| <i>Often (reference)</i>                                |                        |                 |                       |                 |                                                                        |                 |
| <i>Occasionally</i>                                     | 0.704** (0.181)        | 0.08 (0.389)    | 0.462** (0.165)       | 0.501 (0.401)   | 0.526** (0.196)                                                        | 0.70 (0.381)    |
| <i>Never or rarely</i>                                  | 0.928** (0.214)        | 1.013** (0.301) | 0.876** (0.206)       | 0.881** (0.317) | 0.792** (0.232)                                                        | 0.858* (0.361)  |
| Alternative technologies currently covered by insurance |                        |                 |                       |                 |                                                                        |                 |
| <i>Yes (reference)</i>                                  |                        |                 |                       |                 |                                                                        |                 |
| <i>No</i>                                               | 0.142 (0.161)          | 0.242 (0.516)   | -0.003 (0.148)        | 0.556 (0.380)   | -0.143 (0.158)                                                         | 0.106 (0.679)   |
| Out-of-pocket costs (thousand CNY per month increase)   | -0.511** (0.112)       | 1.041** (0.152) | -0.071 (0.078)        | 0.818** (0.125) | -0.211* (0.090)                                                        | 0.790** (0.146) |
| Log likelihood                                          | -706.268               |                 | -707.710              |                 | -562.183                                                               |                 |
| Participants                                            | 207                    |                 | 201                   |                 | 158                                                                    |                 |
| Observations                                            | 2484                   |                 | 2412                  |                 | 1896                                                                   |                 |

\*P<0.05; \*\*P<0.01; SD: Standard Deviation estimates reflect preference heterogeneity in the participants; SE: Standard Error; Urban and Rural Residents Basic Health Insurance (URRBMI); Urban Employees Basic Health Insurance (UEBMI)

<sup>#</sup>This subgroup did not include those UEBMI patients who enjoyed extra health insurance benefits, including who enjoyed public servant subsidies and who enjoyed free medical service.

## Appendix 9: Subgroup analysis according to health related quality of life

Supplemental Table 6. Subgroup analysis according to health related quality of life (HRQoL)

| Attributes                                              | EQ-5D-5L index value $\leq 0.8$ |                 | EQ-5D-5L index value $> 0.8$ |                 |
|---------------------------------------------------------|---------------------------------|-----------------|------------------------------|-----------------|
|                                                         | Mean (SE)                       | SD (SE)         | Mean (SE)                    | SD (SE)         |
| Expected gains in health outcomes from the treatment    |                                 |                 |                              |                 |
| <i>Not as expected (reference)</i>                      | 0.554* (0.228)                  | 0.971* (0.423)  | 0.953** (0.165)              | 0.466(0.493)    |
| <i>As expected</i>                                      |                                 |                 |                              |                 |
| Increasing likelihood of effective treatment (per 10%)  | 0.606** (0.093)                 | 0.450** (0.098) | 0.405** (0.054)              | 0.320** (0.074) |
| Severity of target disease                              |                                 |                 |                              |                 |
| <i>Not severe (reference)</i>                           |                                 |                 |                              |                 |
| <i>Severe</i>                                           | 0.874** (0.240)                 | 0.043(0.408)    | 0.106(0.156)                 | 0.349(0.533)    |
| <i>Lethal</i>                                           | 0.724** (0.254)                 | 0.773* (0.347)  | -0.064(0.195)                | 1.499** (0.281) |
| Incidence of serious adverse events                     |                                 |                 |                              |                 |
| <i>Often (reference)</i>                                |                                 |                 |                              |                 |
| <i>Occasionally</i>                                     | 0.131(0.202)                    | 0.007* (0.461)  | 0.815** (0.166)              | 0.431(0.357)    |
| <i>Never or rarely</i>                                  | 0.516* (0.236)                  | 0.453(0.519)    | 1.120** (0.200)              | 1.103** (0.275) |
| Alternative technologies currently covered by insurance |                                 |                 |                              |                 |
| <i>Yes (reference)</i>                                  | 0.007(0.179)                    | 0.142(0.466)    | 0.093(0.140)                 | 0.560(0.458)    |
| <i>No</i>                                               |                                 |                 |                              |                 |
| Out-of-pocket costs (thousand CNY per month increase)   | -0.233* (0.109)                 | 0.909** (0.157) | -0.283** (0.083)             | 0.979** (0.135) |
| Log likelihood                                          |                                 | -438.402        |                              | -954.540        |
| Participants                                            |                                 | 127             |                              | 281             |
| Observations                                            |                                 | 1524            |                              | 3372            |

\*P<0.05; \*\*P<0.01; SD: Standard Deviation estimates reflect preference heterogeneity in the participants; SE: Standard Error

## Appendix 10: Health-related quality of life by type of insurance

Supplemental Table 7. Health-related quality of life for patients by type of insurance

| Type of insurance | EQ-5D-5L index value $\leq 0.8$ | EQ-5D-5L index value $> 0.8$ |
|-------------------|---------------------------------|------------------------------|
| URRBMI            | 90                              | 117                          |
| UEBMI             | 37                              | 164                          |
| Total             | 127                             | 281                          |

Urban and Rural Residents Basic Health Insurance (URRBMI); Urban Employees Basic Health Insurance (UEBMI)

$$\chi^2 = 29.898 \quad P = 0.000$$

Appendix 11: Subgroup analysis according to gender

Supplemental Table 8. Subgroup analysis according to gender

| Attributes                                              | Male             |                 | Female           |                 |
|---------------------------------------------------------|------------------|-----------------|------------------|-----------------|
|                                                         | Mean (SE)        | SD (SE)         | Mean (SE)        | SD (SE)         |
| Expected gains in health outcomes from the treatment    |                  |                 |                  |                 |
| <i>Not as expected (reference)</i>                      | 0.805** (0.174)  | 0.754* (0.357)  | 0.921** (0.200)  | 0.193(0.512)    |
| <i>As expected</i>                                      |                  |                 |                  |                 |
| Increasing likelihood of effective treatment (per 10%)  | 0.476** (0.065)  | 0.409** (0.077) | 0.456** (0.069)  | 0.362** (0.089) |
| Severity of target disease                              |                  |                 |                  |                 |
| <i>Not severe (reference)</i>                           |                  |                 |                  |                 |
| <i>Severe</i>                                           | 0.303(0.177)     | 0.541(0.425)    | 0.346(0.191)     | 0.333(0.435)    |
| <i>Lethal</i>                                           | 0.249(0.199)     | 1.077** (0.282) | 0.182(0.241)     | 1.582** (0.319) |
| Incidence of serious adverse events                     |                  |                 |                  |                 |
| <i>Often (reference)</i>                                |                  |                 |                  |                 |
| <i>Occasionally</i>                                     | 0.680** (0.167)  | 0.471(0.371)    | 0.528** (0.187)  | 0.007(0.417)    |
| <i>Never or rarely</i>                                  | 0.953** (0.204)  | 0.768*(0.338)   | 0.897** (0.232)  | 1.146** (0.306) |
| Alternative technologies currently covered by insurance |                  |                 |                  |                 |
| <i>Yes (reference)</i>                                  |                  |                 |                  |                 |
| <i>No</i>                                               | 0.127(0.144)     | 0.288(0.650)    | 0.093(0.168)     | 0.202(0.643)    |
| Out-of-pocket costs (thousand CNY per month increase)   | -0.246** (0.084) | 0.893** (0.131) | -0.281** (0.098) | 0.979** (0.153) |
| Log likelihood                                          |                  | -780.85         |                  | -667.657        |
| Participants                                            |                  | 220             |                  | 188             |
| Observations                                            |                  | 2640            |                  | 2256            |

\*P<0.05; \*\*P<0.01; SD: Standard Deviation estimates reflect preference heterogeneity in the participants; SE: Standard Error

**STROBE 2007 (v4) checklist of items to be included in reports of observational studies in epidemiology\***  
**Checklist for cohort, case-control, and cross-sectional studies (combined)**

| Section/Topic             | Item # | Recommendation                                                                                                                                                                                                                                                                                                                                                                                                                                                         | Reported on page #                           |
|---------------------------|--------|------------------------------------------------------------------------------------------------------------------------------------------------------------------------------------------------------------------------------------------------------------------------------------------------------------------------------------------------------------------------------------------------------------------------------------------------------------------------|----------------------------------------------|
| Title and abstract        | 1      | (a) Indicate the study's design with a commonly used term in the title or the abstract                                                                                                                                                                                                                                                                                                                                                                                 | Page 2                                       |
|                           |        | (b) Provide in the abstract an informative and balanced summary of what was done and what was found                                                                                                                                                                                                                                                                                                                                                                    | Page 3-4                                     |
| <b>Introduction</b>       |        |                                                                                                                                                                                                                                                                                                                                                                                                                                                                        |                                              |
| Background/rationale      | 2      | Explain the scientific background and rationale for the investigation being reported                                                                                                                                                                                                                                                                                                                                                                                   | Page 6-8                                     |
| Objectives                | 3      | State specific objectives, including any pre-specified hypotheses                                                                                                                                                                                                                                                                                                                                                                                                      | Page 8 (line 47-54)                          |
| <b>Methods</b>            |        |                                                                                                                                                                                                                                                                                                                                                                                                                                                                        |                                              |
| Study design              | 4      | Present key elements of study design early in the paper                                                                                                                                                                                                                                                                                                                                                                                                                | Page 9 (line 11-20)                          |
| Setting                   | 5      | Describe the setting, locations, and relevant dates, including periods of recruitment, exposure, follow-up, and data collection                                                                                                                                                                                                                                                                                                                                        | Page 9-12                                    |
| Participants              | 6      | (a) <i>Cohort study</i> —Give the eligibility criteria, and the sources and methods of selection of participants. Describe methods of follow-up<br><i>Case-control study</i> —Give the eligibility criteria, and the sources and methods of case ascertainment and control selection. Give the rationale for the choice of cases and controls<br><i>Cross-sectional study</i> —Give the eligibility criteria, and the sources and methods of selection of participants | Page 12 (line 34-46)                         |
|                           |        | (b) <i>Cohort study</i> —For matched studies, give matching criteria and number of exposed and unexposed<br><i>Case-control study</i> —For matched studies, give matching criteria and the number of controls per case                                                                                                                                                                                                                                                 | Not applicable                               |
| Variables                 | 7      | Clearly define all outcomes, exposures, predictors, potential confounders, and effect modifiers. Give diagnostic criteria, if applicable                                                                                                                                                                                                                                                                                                                               | Page 10 (line 38-42);<br>Page 11 (line 5-21) |
| Data sources/ measurement | 8*     | For each variable of interest, give sources of data and details of methods of assessment (measurement). Describe comparability of assessment methods if there is more than one group                                                                                                                                                                                                                                                                                   | Page 13;<br>Page 14 (line 5-13)              |
| Bias                      | 9      | Describe any efforts to address potential sources of bias                                                                                                                                                                                                                                                                                                                                                                                                              | Page 13 (line 3-31)                          |
| Study size                | 10     | Explain how the study size was arrived at                                                                                                                                                                                                                                                                                                                                                                                                                              | Page 12 (line 39-52)                         |
| Quantitative variables    | 11     | Explain how quantitative variables were handled in the analyses. If applicable, describe which groupings were chosen and why                                                                                                                                                                                                                                                                                                                                           | Page 14 (line 41-47)                         |
| Statistical methods       | 12     | (a) Describe all statistical methods, including those used to control for confounding                                                                                                                                                                                                                                                                                                                                                                                  | Page 14 (line 20-37)                         |
|                           |        | (b) Describe any methods used to examine subgroups and interactions                                                                                                                                                                                                                                                                                                                                                                                                    | Page 14 (line 58);<br>Page 15 (line 5)       |
|                           |        | (c) Explain how missing data were addressed                                                                                                                                                                                                                                                                                                                                                                                                                            | Page 13 (line 16-24)                         |

|                   |     |                                                                                                                                                                                                                                                                                                           |                                                                |
|-------------------|-----|-----------------------------------------------------------------------------------------------------------------------------------------------------------------------------------------------------------------------------------------------------------------------------------------------------------|----------------------------------------------------------------|
|                   |     | (d) <i>Cohort study</i> —If applicable, explain how loss to follow-up was addressed<br><i>Case-control study</i> —If applicable, explain how matching of cases and controls was addressed<br><i>Cross-sectional study</i> —If applicable, describe analytical methods taking account of sampling strategy | Not applicable                                                 |
|                   |     | (e) Describe any sensitivity analyses                                                                                                                                                                                                                                                                     | Page 14 (line 58);<br>Page 15 (line 5)<br>Page 15 (line 43-54) |
| <b>Results</b>    |     |                                                                                                                                                                                                                                                                                                           |                                                                |
| Participants      | 13* | (a) Report numbers of individuals at each stage of study—eg numbers potentially eligible, examined for eligibility, confirmed eligible, included in the study, completing follow-up, and analysed                                                                                                         | Page 15 (line 22-32)                                           |
|                   |     | (b) Give reasons for non-participation at each stage                                                                                                                                                                                                                                                      | Not applicable                                                 |
|                   |     | (c) Consider use of a flow diagram                                                                                                                                                                                                                                                                        | Not applicable                                                 |
| Descriptive data  | 14* | (a) Give characteristics of study participants (eg demographic, clinical, social) and information on exposures and potential confounders                                                                                                                                                                  | Page 15 (line 33-58);<br>Page 16                               |
|                   |     | (b) Indicate number of participants with missing data for each variable of interest                                                                                                                                                                                                                       | Not applicable                                                 |
|                   |     | (c) <i>Cohort study</i> —Summarise follow-up time (eg, average and total amount)                                                                                                                                                                                                                          | Not applicable                                                 |
| Outcome data      | 15* | <i>Cohort study</i> —Report numbers of outcome events or summary measures over time                                                                                                                                                                                                                       |                                                                |
|                   |     | <i>Case-control study</i> —Report numbers in each exposure category, or summary measures of exposure                                                                                                                                                                                                      |                                                                |
|                   |     | <i>Cross-sectional study</i> —Report numbers of outcome events or summary measures                                                                                                                                                                                                                        | Page 17 (line 17-60)                                           |
| Main results      | 16  | (a) Give unadjusted estimates and, if applicable, confounder-adjusted estimates and their precision (eg, 95% confidence interval). Make clear which confounders were adjusted for and why they were included                                                                                              | Page 15 (line 43-54);<br>Page 19 (line 33-39)                  |
|                   |     | (b) Report category boundaries when continuous variables were categorized                                                                                                                                                                                                                                 | Not applicable                                                 |
|                   |     | (c) If relevant, consider translating estimates of relative risk into absolute risk for a meaningful time period                                                                                                                                                                                          | Not applicable                                                 |
| Other analyses    | 17  | Report other analyses done—eg analyses of subgroups and interactions, and sensitivity analyses                                                                                                                                                                                                            | Page 18-19                                                     |
| <b>Discussion</b> |     |                                                                                                                                                                                                                                                                                                           |                                                                |
| Key results       | 18  | Summarise key results with reference to study objectives                                                                                                                                                                                                                                                  | Page 20 (line 10-60);<br>Page 21 (line 5-7)                    |
| Limitations       | 19  | Discuss limitations of the study, taking into account sources of potential bias or imprecision. Discuss both direction and magnitude of any potential bias                                                                                                                                                | Page 23 (line 31-59);<br>Page 24 (line 5-11)                   |
| Interpretation    | 20  | Give a cautious overall interpretation of results considering objectives, limitations, multiplicity of analyses, results from similar studies, and other relevant evidence                                                                                                                                | Page 22 (line 19-59);<br>Page 23 (line 5-13)                   |
| Generalisability  | 21  | Discuss the generalisability (external validity) of the study results                                                                                                                                                                                                                                     | Page 23 (line 17-29)<br>Page 24 (line 16-28)                   |

|                          |    |                                                                                                                                                               |                      |
|--------------------------|----|---------------------------------------------------------------------------------------------------------------------------------------------------------------|----------------------|
|                          |    |                                                                                                                                                               |                      |
| <b>Other information</b> |    |                                                                                                                                                               |                      |
| Funding                  | 22 | Give the source of funding and the role of the funders for the present study and, if applicable, for the original study on which the present article is based | Page 25 (line 18-30) |

\*Give information separately for cases and controls in case-control studies and, if applicable, for exposed and unexposed groups in cohort and cross-sectional studies.

**Note:** An Explanation and Elaboration article discusses each checklist item and gives methodological background and published examples of transparent reporting. The STROBE checklist is best used in conjunction with this article (freely available on the Web sites of PLoS Medicine at <http://www.plosmedicine.org/>, Annals of Internal Medicine at <http://www.annals.org/>, and Epidemiology at <http://www.epidem.com/>). Information on the STROBE Initiative is available at [www.strobe-statement.org](http://www.strobe-statement.org).

For peer review only



# BMJ Open

## Patients' preferences for health insurance coverage of new technologies for treating chronic diseases in China: a discrete choice experiment

|                                 |                                                                                                                                                                                                                                                                                                                                                                                                                                                                                                                                                                                                                                                          |
|---------------------------------|----------------------------------------------------------------------------------------------------------------------------------------------------------------------------------------------------------------------------------------------------------------------------------------------------------------------------------------------------------------------------------------------------------------------------------------------------------------------------------------------------------------------------------------------------------------------------------------------------------------------------------------------------------|
| Journal:                        | <i>BMJ Open</i>                                                                                                                                                                                                                                                                                                                                                                                                                                                                                                                                                                                                                                          |
| Manuscript ID                   | bmjopen-2020-038051.R2                                                                                                                                                                                                                                                                                                                                                                                                                                                                                                                                                                                                                                   |
| Article Type:                   | Original research                                                                                                                                                                                                                                                                                                                                                                                                                                                                                                                                                                                                                                        |
| Date Submitted by the Author:   | 29-Jul-2020                                                                                                                                                                                                                                                                                                                                                                                                                                                                                                                                                                                                                                              |
| Complete List of Authors:       | Geng, JinSong; Nantong University Medical School, Department of Medical Informatics<br>Chen, Xiaowei; Nantong University Medical School, Department of Medical Informatics; Zhejiang University School of Medicine First Affiliated Hospital, Library and Reference Department<br>Bao, Haini; Nantong University Medical School, Department of Medical Informatics<br>Qian, Danmin; Nantong University Medical School, Department of Medical Informatics<br>Shao, Yuting; Tongji University School of Medicine, Department of Ophthalmology<br>Yu, Hao; Harvard Medical School, Department of Population Medicine; Harvard Pilgrim Health Care Institute |
| <b>Primary Subject Heading</b>: | Health policy                                                                                                                                                                                                                                                                                                                                                                                                                                                                                                                                                                                                                                            |
| Secondary Subject Heading:      | Health services research                                                                                                                                                                                                                                                                                                                                                                                                                                                                                                                                                                                                                                 |
| Keywords:                       | Health policy < HEALTH SERVICES ADMINISTRATION & MANAGEMENT, International health services < HEALTH SERVICES ADMINISTRATION & MANAGEMENT, Health & safety < HEALTH SERVICES ADMINISTRATION & MANAGEMENT                                                                                                                                                                                                                                                                                                                                                                                                                                                  |
|                                 |                                                                                                                                                                                                                                                                                                                                                                                                                                                                                                                                                                                                                                                          |

SCHOLARONE™  
Manuscripts



I, the Submitting Author has the right to grant and does grant on behalf of all authors of the Work (as defined in the below author licence), an exclusive licence and/or a non-exclusive licence for contributions from authors who are: i) UK Crown employees; ii) where BMJ has agreed a CC-BY licence shall apply, and/or iii) in accordance with the terms applicable for US Federal Government officers or employees acting as part of their official duties; on a worldwide, perpetual, irrevocable, royalty-free basis to BMJ Publishing Group Ltd ("BMJ") its licensees and where the relevant Journal is co-owned by BMJ to the co-owners of the Journal, to publish the Work in this journal and any other BMJ products and to exploit all rights, as set out in our [licence](#).

The Submitting Author accepts and understands that any supply made under these terms is made by BMJ to the Submitting Author unless you are acting as an employee on behalf of your employer or a postgraduate student of an affiliated institution which is paying any applicable article publishing charge ("APC") for Open Access articles. Where the Submitting Author wishes to make the Work available on an Open Access basis (and intends to pay the relevant APC), the terms of reuse of such Open Access shall be governed by a Creative Commons licence – details of these licences and which [Creative Commons](#) licence will apply to this Work are set out in our licence referred to above.

Other than as permitted in any relevant BMJ Author's Self Archiving Policies, I confirm this Work has not been accepted for publication elsewhere, is not being considered for publication elsewhere and does not duplicate material already published. I confirm all authors consent to publication of this Work and authorise the granting of this licence.

# Patients' preferences for health insurance coverage of new technologies for treating chronic diseases in China: a discrete choice experiment

Jinsong Geng<sup>1\*</sup>, Xiaowei Chen<sup>1,2</sup>, Haini Bao<sup>1</sup>, Danmin Qian<sup>1</sup>, Yuting Shao<sup>3</sup>, Hao Yu<sup>4</sup>

<sup>1</sup>Department of Medical Informatics, Nantong University Medical School, Nantong, China

<sup>2</sup>Library and Reference Department, Zhejiang University School of Medicine First Affiliated Hospital, Hangzhou, China

<sup>3</sup>Department of Ophthalmology, Tongji University School of Medicine, Shanghai, China

<sup>4</sup>Department of Population Medicine, Harvard Medical School and Harvard Pilgrim Health Care Institute, Boston, USA

\*Correspondence: Jinsong Geng, Department of Medical Informatics, Nantong University Medical School, 19 Qixiu Road, Nantong 226001, China; Email [gjs@ntu.edu.cn](mailto:gjs@ntu.edu.cn); Tel: +86 513 85051891; Fax: +86 513 85051876

**Word count: 5065**

## ABSTRACT

### Objectives

Our study aimed to inform insurance decision-making in China by investigating patients' preferences for insurance coverage of new technologies for treating chronic diseases.

### Design

We identified six attributes of new medical technologies for treating chronic diseases and used Bayesian-efficient design to generate choice sets for a discrete choice experiment (DCE). After conducting the DCE, we analyzed the data by mixed logit regression to examine patient-reported preference for each attribute.

### Setting

The DCE was conducted with patients in six tertiary hospitals from four cities in Jiangsu Province.

### Participants

Patients aged 18 years or older with a history of diabetes or hypertension and taking medications regularly for more than one year were recruited (N=408).

### Results

The technology attributes regarding expected gains in health outcomes from the treatment ( $P<0.01$ ), high likelihood of effective treatment ( $P<0.01$ ), and low incidence of serious adverse events ( $P<0.01$ ) were significant, positive predictors of choice by the study patients. Out-of-pocket costs was a significant, negative attribute for the entire study sample ( $\beta = -0.258$ ,  $P<0.01$ ) and for the patients with Urban and Rural Residents Basic Medical Insurance (URRBMI) ( $\beta = -0.511$ ,  $P<0.01$ ), but not for all the patients with Urban Employees Basic Medical Insurance (UEBMI) ( $\beta = -0.071$ ,  $P>0.05$ ). Severity of target disease was valued by patients with lower EQ-5D-5L index value as well as URRBMI enrollees.

### Conclusions

Patients valued most the health benefits and risks of new technologies, which were

1  
2  
3  
4  
5 closely related to their own feelings of disease and perceptions of health-related quality  
6 of life. However, there existed heterogeneity in preferences between URRBMI and  
7 UEBMI patients. Further efforts should be made to reduce the gap between insurance  
8 schemes and make safe and cost-effective new technologies as priority for health  
9 insurance reimbursement.  
10  
11  
12  
13  
14  
15

16 **Keywords:** discrete choice experiment, patient preferences, chronic diseases, health  
17 insurance  
18  
19  
20  
21  
22  
23  
24  
25  
26  
27  
28  
29  
30  
31  
32  
33  
34  
35  
36  
37  
38  
39  
40  
41  
42  
43  
44  
45  
46  
47  
48  
49  
50  
51  
52  
53  
54  
55  
56  
57  
58  
59  
60

## Strengths and limitations of this study

- Our study provides evidence regarding patients' preferences for insurance coverage of new technologies for treating chronic diseases and will be helpful for applying a patient-centered approach to policy-making.
- Discrete choice experiment is a rigorous method that enables us to identify differential preferences among chronic disease patients by type of social health insurance and by level of health-related quality of life in China.
- Bayesian-efficient design was used to improve statistical efficiency of the choice design, and blocking technique was used to increase response efficiency of patients.
- Since our sample was from one wealthy province in China, future studies of nationally representative samples are needed.
- While this study focused on hypertension and diabetes, two of the most prevalent chronic diseases, future studies need to examine other types of chronic diseases.

## INTRODUCTION

Non-communicable chronic diseases (chronic diseases) are health conditions or diseases with long-term accumulation, non-self-healing, and difficult to cure. Nowadays, the prevalence and mortality of chronic diseases are on the rise around the world.<sup>1</sup> Chronic diseases present a particularly daunting challenge to China. It was estimated that among Chinese adults aged 35 to 75 years, nearly half had hypertension.<sup>2</sup> The overall prevalence of diabetes in Chinese adults was about 10.9%.<sup>3</sup> Furthermore, comorbidities are highly prevalent among patients with chronic diseases, which have a negative impact on the patient's quality of life and impede the efficacy of treatment.<sup>4-6</sup> Chronic diseases lead to heavy financial burden on patients' families and health insurance programs. It was estimated that the total economic burden associated with chronic diseases in China over the period 2010-2030 could be as high as US\$16 trillion (measured in 2010 US Dollars).<sup>7</sup> Further adding to the challenges to China's health insurance programs' financing capacity, new technologies for treating chronic diseases continue to enter the market, which can be very expensive and contribute to rising healthcare costs. Deciding on which new technology to cover and by which insurance program has become a key issue facing policy-makers in China in the context of universal health insurance coverage.

As part of its goal of providing timely, acceptable and affordable basic healthcare of appropriate quality to its residents, China successfully achieved universal health insurance coverage in 2011, increasing demand for and expenditures on healthcare. China's total health expenditures grew at an average annual rate of 12.2% in 2008-2017, much higher than its GDP's average annual growth rate (8.1%).<sup>8</sup> In recent years, Chinese policy-makers have struggled to keep a balance between expenditure control and meeting patients' demand for healthcare, including the demand for new technologies by patients with chronic diseases. China's National Healthcare Security Administration is promoting the health insurance payment based on diagnosis-related groups (DRGs), a patient classification for standardizing payment in the national health

1  
2  
3  
4  
5 insurance schemes. Accordingly, medical fees and insurance payments will be based on  
6 DRG classification, which includes chronic diseases such as diabetes and hypertension.<sup>9</sup>  
7

8  
9 After China reached universal health insurance coverage, there were still  
10 considerable disparities in benefit coverage and reimbursement ratio among the three  
11 major public insurance programs that together covered more than 95% of Chinese  
12 people, including New Rural Cooperative Medical Scheme (NRCMS), Urban Residents  
13 Basic Medical insurance (URBMI), and Urban Employees Basic Medical insurance  
14 (UEBMI). For details of differences in health insurance eligibility, premiums and  
15 benefits among the three programs, see the paper published by Yu.<sup>10</sup> Generally  
16 speaking, UEBMI has the best benefit package and the lowest out-of-pocket costs  
17 among the three public insurance programs,<sup>11 12</sup> and UEBMI enrollees had higher  
18 likelihood of healthcare utilization.<sup>13</sup> To improve administrative efficiency and reduce  
19 inequality in insurance benefits, China State Council issued the policy in January 2016  
20 on merging the NRCMS and URBMI to form the Urban Rural and Residents Basic  
21 Medical Insurance (URRBMI).<sup>14</sup> While the newly formed URRBMI helped equalize  
22 insurance benefits between urban and rural residents, gaps remained between URRBMI  
23 and UEBMI. For example, according to the 2018 statistical bulletin issued by China's  
24 National Healthcare Security Administration, the average per capita hospitalization cost  
25 for inpatients was 11,181 CNY (about US\$1704) for UEBMI enrollees, and 6577 CNY  
26 (about US\$1003) for URRBMI enrollees.<sup>15</sup> The average inpatient reimbursement ratio  
27 for UEBMI enrollees was 71.8%, and the reimbursement ratio for URRBMI enrollees  
28 was 56.1%.<sup>15</sup> Even among the UEBMI enrollees, insurance benefit is not equal since  
29 some of the enrollees enjoy civil servant subsidies.<sup>16</sup> For example, if the medical  
30 expenditure exceeds the ceiling of health insurance reimbursement, outpatients and  
31 inpatients that enjoy civil servant subsidies may still be subsidized by 70% and 80%  
32 respectively for the exceeding parts.<sup>17</sup> Whereas disparities in China's insurance  
33 programs and patient's utilization of healthcare have been well-documented in the  
34 literature, no studies have yet examined whether patient preferences for new medical  
35  
36  
37  
38  
39  
40  
41  
42  
43  
44  
45  
46  
47  
48  
49  
50  
51  
52  
53  
54  
55  
56  
57  
58  
59  
60



1  
2  
3  
4  
5  
6  
7  
8  
9  
10  
11  
12  
13  
14  
15  
16  
17  
18  
19  
20  
21  
22  
23  
24  
25  
26  
27  
28  
29  
30  
31  
32  
33  
34  
35  
36  
37  
38  
39  
40  
41  
42  
43  
44  
45  
46  
47  
48  
49  
50  
51  
52  
53  
54  
55  
56  
57  
58  
59  
60

technology vary by type of insurance. This study aimed to fill the gap.

Patient-reported outcome measures, such as health-related quality of life (HRQoL), are useful for understanding the impact of disease on their functional status and well-being.<sup>18</sup> EQ-5D series are among the most widely used multi-attribute utility instruments to measure HRQoL. EQ-5D-5L uses a health-state classification system which defines health in 5 areas,<sup>19</sup> has been proved to have the validity and discriminatory power to measure HRQoL in patients with chronic diseases.<sup>20-22</sup> Although HRQoL is an essential measure of health status to inform public health and health policy, whether patients' preferences on reimbursement differ from HRQoL remains unclear.

Eliciting patients' preferences and involving patients in health insurance decision-making can be helpful to increase satisfaction of patients and is an integral part of patient-centered care, which is defined as providing care that is respectful of, and responsive to individual patient preferences, needs and values.<sup>23</sup> Although patient-centered approach and value-based care has been long advocated in China, there still a lack of evidence from patients that reflect their preferences to inform health insurance coverage decision-making. This study added new information to the literature by conducting a discrete choice experiment (DCE), which is an attribute-based method to measure the preferences and trade-off of responders and becomes a recognized scientific approach to elicit preferences.<sup>24</sup> Prior research showed that DCE was fruitful and reliable to effectively improve healthcare decision-making.<sup>25</sup> Our DCE focused on chronic disease patients, and its goal was to support evidence-informed insurance policy-making in China. Specifically, we used the DCE data to test the following hypotheses: (1) new technology attributes regarding health benefits are more important than other attributes for health insurance coverage; (2) patients' preferences differ by type of disease and type of insurance.

## METHODS

### Identification of technology attributes and levels

Our DCE design, implementation, and analysis followed the user guide developed jointly by the World Bank, World Health Organization, and U.S. Agency for International Development.<sup>26</sup> We used a three-step approach to complete the preliminary stage of DCE, which aimed to identify and define the attributes and levels of new medical technologies. First, a systematic review was conducted to select attributes which were often used in multi-criteria decision analyses of health insurance decision-making. The systematic review was performed according to the framework for evidence-based decision-making as defined by EVIDEM.<sup>27</sup> We found that the most commonly mentioned dimensions were comparative outcomes (effectiveness, safety/tolerability), economic consequences (costs and cost-effectiveness) and needs of new technologies (severity of target disease, size of affected population, unmet needs related to the already reimbursed technologies), and knowledge of new technologies (quality of evidence, expert consensus/clinical practice guideline). Results of these findings were published in a separate paper.<sup>28</sup>

Second, both focus group discussions with physicians and expert consultation were carried out to determine attributes used in our research. There was no consensus among physicians about the criteria to determine the level of attributes of new technologies to treat diabetes and hypertension in our evidence-based clinical practice workshop. Then, we did focus group discussion and expert consultation on attributes and levels regarding reimbursement of new medical technologies. 14 experts (from 6 provinces in China) in reimbursement, health economics, healthcare service and evidence-based medicine were consulted. Results were published in another separate paper.<sup>29</sup> Criteria regarding needs of the technology (severity, benefit type of technology, unmet needs of reimbursed technology), comparative outcomes (effectiveness, safety/tolerability, patient-perceived/patient-reported outcomes), and economic aspects of the technology

1  
2  
3  
4  
5 (costs and cost-effectiveness) were needed in health insurance reimbursement  
6  
7 decision-making. We also searched the famous health technology assessment database  
8  
9 established by Canadian Agency for Drugs and Technologies in Health (CADTH) to  
10  
11 select potential new technologies and find reasons for recommendation of  
12  
13 reimbursement to better define the levels of attributes. We found 68 reports regarding  
14  
15 hypertension and diabetes which were published before March 2018. Data extraction  
16  
17 form was developed and attributes of new technologies were extracted. We further  
18  
19 searched the database founded by China National Medical Products Administration  
20  
21 (NMPA, formerly China Food and Drug Administration or CFDA) according to the  
22  
23 generic name of new technologies to see if they were approved and available in China.  
24  
25 We also referred to the list published by city governments in Jiangsu Province about the  
26  
27 medical technologies which were already covered by the public health insurance  
28  
29 programs. After completing the database search, we defined new medical technologies  
30  
31 in this study as the therapeutics for hypertension and diabetes, which had been marketed  
32  
33 in China but were not covered by the public health insurance programs in Jiangsu in  
34  
35 2018. We determined the range of out-of-pocket costs according to the retail price of  
36  
37 new technologies.

38  
39 Attributes and levels of new medical technologies which were used in our research  
40  
41 were listed in Table 1. Details of the explanation of attributes and levels were shown in  
42  
43 Appendix 1. Because our purpose was to identify the specific technology attributes and  
44  
45 levels that were preferred by patients, not a specific technology for treating a specific  
46  
47 disease, the scenarios in our DCE were not restricted to a specific type of disease.  
48  
49  
50  
51  
52  
53  
54  
55  
56  
57  
58  
59  
60

**Table 1. Attributes and levels of new medical technology in the DCE**

| Attributes                                              | Levels                                    | Variables coding |
|---------------------------------------------------------|-------------------------------------------|------------------|
| Expected gains in health outcomes from the treatment    | Not as expected; As expected              | Binary           |
| Likelihood of effective treatment                       | 30%-90%                                   | Continuous       |
| Severity of target disease                              | Not severe; Severe but not lethal; Lethal | Categorical      |
| Incidence of serious adverse events                     | Often; Occasionally; Never or rarely      | Categorical      |
| Alternative technologies currently covered by insurance | Yes; No                                   | Binary           |
| Out-of-pocket costs per month (if not reimbursed)       | CNY 300-3500                              | Continuous       |

Note: We defined new medical technologies according to research objectives. New medical technologies referred to new technologies that entered into the market recently before our study but were not included in the reimbursement lists of social health insurance programs, such as URRBMI and UEBMI.

The average exchange rate of US Dollars to Chinese Yuan (CNY) in 2018 was about 6.56. Therefore, CNY 300 was approximately US\$46; CNY 3500 were about US\$533.

## Experimental design and development of the questionnaire

D-efficiency experimental design that maximized the precision of estimated choice-model parameters for a given number of choice questions<sup>30</sup> was created by Ngene1.1.2 software (Choice-Metrics, Sydney, Australia). Prior coefficients were set to zero during the pilot. After obtaining priors of the attributes from the pilot, Bayesian-efficient design was used to generate the final choice sets, which consisted of 30 pairs of scenarios and were divided into five blocks, with six pairs in each block. Blocking design promoted response efficiency by reducing the potential cognitive burden to respondents.<sup>31</sup>

We chose unlabeled over labeled DCE. Unlabeled DCE was widely used to investigate patients' preferences for treatment techniques.<sup>32-34</sup> Respondents of unlabeled DCEs found that they were not subject to the psychological cues of the technology labels, thus reflecting the real-world choice situation.<sup>35</sup> In addition, in our research, new medical technologies to treat chronic disease continue to emerge. Therefore, an unlabeled DCE was considered appropriate for our study. The forced choice sets were used in our DCE because when no option had a definitive advantage, it was assumed

1  
2  
3  
4  
5 that forced choice under preference uncertainty would favor options that were easier to  
6 justify and associated with a lower likelihood of error and regret, such as compromise  
7 and asymmetrically dominating options.<sup>36</sup>  
8  
9

10 Examples of scenarios were shown in Appendix 2. Our final questionnaire  
11 contained two sections. Section A listed questions regarding participants'  
12 socio-demographic characteristics, past medical history, reasons for hospital visit, and  
13 health insurance information, EQ-5D-5L dimensions and levels. EQ-5D-5L used a  
14 health-state classification system defining health in 5 dimensions, mobility, self-care,  
15 usual activities, pain/discomfort, and anxiety/depression. Each of the 5 dimensions was  
16 divided into five levels of perceived problems, no problem, mild problems, moderate  
17 problems, severe problems, and unable to/extreme problems. Section B was the DCE  
18 task.  
19  
20  
21  
22  
23  
24  
25  
26  
27  
28

## 29 **DCE implementation and data collection**

30  
31  
32 Our DCE was carried out from September 15<sup>th</sup> to October 15<sup>th</sup>, 2018 in six tertiary  
33 public hospitals from four cities in Jiangsu Province. Since our DCE aimed to inform  
34 decision-making on patient-centered care by identifying patients' preferences, our study  
35 sample consisted of patients with chronic diseases, not the general population, which  
36 did not necessarily understand or reflect the preferences of patients. Due to the high  
37 prevalence, serious complications and heavy burden of hypertension and diabetes, we  
38 selected patients with these diseases as participants. Inclusion criteria for patients  
39 including those aged 18 years or older, participating in a social health insurance  
40 program, with a history of diabetes or hypertension, and taking medications regularly  
41 for more than one year. Patients were enrolled consecutively during the study period.  
42  
43  
44  
45  
46  
47  
48  
49  
50

51 There was no general standard on the ideal sample size required for a DCE<sup>37</sup>.  
52 Generally speaking, a less efficient design may also require a larger sample size,  
53 resulting in increased costs.<sup>38</sup> Estimates of the sample size were usually determined on  
54 the basis of previous research, rules of thumb and budget constraints. DCE studies  
55  
56  
57  
58  
59  
60

1  
2  
3  
4  
5 showed that reliable models could be estimated in samples with more than 50  
6 participants.<sup>39 40</sup>  
7

8  
9 The DCE questionnaires were administered through one-to-one, face-to-face  
10 interviews to ensure validity and quality of the investigation. Our interviewers consisted  
11 of 13 medical students, all of whom were in hospitals doing their internships during the  
12 research period. For quality assurance, the interviewers were trained before the  
13 experiment. We compiled a survey training manual, provided detailed descriptions of  
14 how to interpret each scenario, and asked each interviewer to make explanations to  
15 patients. The interviewers were required to check whether the entire questionnaire was  
16 complete immediately after each interview. If any information was missing, they had to  
17 go back to ask patients to provide the information on site. For patients with blurred  
18 vision or illiteracy, the interviewers explained the meaning of the questionnaire item by  
19 item until the patients fully understood each item.  
20  
21  
22  
23  
24  
25  
26  
27  
28  
29

30 Verbal informed consent was obtained from all patients prior to both the pilot and  
31 the final survey. Patients were made aware that the participation in the survey was  
32 voluntary. All data and information collected from patients were anonymous. During  
33 the pilot and formal survey, patients had to make a decision based on the assumption  
34 that only one technology can be covered due to limited health insurance funds. They  
35 were asked to think carefully and trade-off between two new medical technologies. The  
36 survey time ranged from 20 minutes to one hour. We prepared a packed cotton towel for  
37 each patient as a gift (CNY 10, or US\$1.4). Patients were asked about how confident  
38 they felt in completing the choice sets. The score of confidence ranged from 0 (not  
39 confident at all) to 10 (extremely confident) (Appendix 3). We excluded the DCE  
40 questionnaire with a score of less than 8.  
41  
42  
43  
44  
45  
46  
47  
48  
49  
50  
51

## 52 **Patient and public involvement**

53

54  
55 90 patients with diabetes or hypertension were engaged in the pilot survey to  
56 provide feedback on intelligibility, acceptability and reliability of the questionnaire.  
57  
58  
59  
60

1  
2  
3  
4  
5 Response from patients led to more explicit and apprehensible description of the survey  
6 questions. Patients were not involved in the recruitment of study participants or the  
7  
8 conduct of the study. Findings of the study would be disseminated through publication  
9  
10 and social media.  
11  
12  
13  
14

## 15 Data analysis

16  
17  
18 Our empirical analysis of the DCE data was based on the random utility model.  
19 Like prior research,<sup>26</sup> we considered the utility,  $U$ , that patient,  $i$ , assigned to choice,  $j$ ,  
20 from  $J$  alternative choices, as the sum of two parts: observable component and  
21  
22 unobservable component. The equation was developed as follows:  
23  
24  
25

$$26 U_{ij} = V_{ij} + \varepsilon_{ij} = \beta_0 + \beta_1 x_{1ij} + \beta_2 x_{2ij} + \dots + \beta_m x_{mij} + \varepsilon_{ij}$$

27  
28 where  $V_{ij}$  was the observable component determined by patients' preferences of  
29 attributes ( $x_1, \dots, x_m$ ),  $\varepsilon_{ij}$  was the unobservable component which was a function of  
30 unobserved attributes and individual-level variation, and  $\beta$  quantified the strength of  
31 preference for each attribute level.<sup>26</sup>  
32  
33  
34  
35

36 We implemented the above equation by estimating mixed logit regression using  
37 STATA 14.2 SE (StatCorp LP, College Station, Texas, USA) and was specified with  
38 500 Halton draws. Mixed logit model allows for unknown heterogeneity in individual  
39 preferences and estimates both the mean preference weight and the standard deviation.  
40 We assumed that all variables of the attributes, except for the constant, had a random  
41 component and that the weights of preference were normally distributed. The choice of  
42 patients was the dependent variable, and the selected technology attributes were  
43 independent variables. Dummy coding was used for categorical variables of our DCE  
44 data. For dummy variable coding, each model-estimated coefficient is a measure of the  
45 strength of preference of that level relative to the omitted level of that attribute.<sup>41 42</sup>  
46 Subgroup analysis was performed by type of disease, type of insurance, HRQoL, and  
47 gender. In each regression model, attribute level with a negative coefficient indicates  
48  
49  
50  
51  
52  
53  
54  
55  
56  
57  
58  
59  
60

1  
2  
3  
4 that patients would prefer not to move from the reference level to that level, while an  
5 attribute level with a positive coefficient indicates that patients would prefer to move to  
6 that level from the reference level.<sup>39</sup>  
7  
8  
9

## 10 11 12 13 **RESULTS**

### 14 15 16 **Characteristics of patients**

17  
18  
19 A total of 410 patients were consented to take part in the DCE survey, and the data  
20 from 408 patients were available for analysis with two patients excluded from the  
21 analysis due to non-compliance with the inclusion criteria, incomplete data and not  
22 confident. The mean score for confidence was 8.80 (95%CI 8.69-8.90), which  
23 suggested patients were confident in their choice. For details about number of patients  
24 in each sample hospital, see Appendix 4.  
25  
26  
27  
28  
29

30  
31 Table 2 presented demographic and clinical characteristics of the included patients.  
32 The sample had more males than females (53.92% vs. 46.08%). The patients had a  
33 mean age of 62.34 years (ranging from 28 to 96 years). They were almost evenly split  
34 between UEBMI and URRBMI (49.26% vs. 50.73%). Most of the patients had  
35 hypertension (63.97%) with 14.22% of them having both hypertension and diabetes  
36 while 21.81% of them had diabetes only. There was no statistically significant  
37 difference between hypertension and diabetes patients in terms of insurance types  
38 (UEBMI vs URRBMI, P=0.392) and benefits (UEBMI with extra benefit vs UEBMI  
39 without extra benefit, P=0.598) (Appendix 5). Among the 180 patients who had chronic  
40 comorbid conditions other than hypertension and diabetes, cardiovascular disease was  
41 the most common comorbidity (98 patients) (Appendix 6).  
42  
43  
44  
45  
46  
47  
48  
49  
50  
51  
52  
53  
54  
55  
56  
57  
58  
59  
60



**Table 2. Characteristics of patients (n=408)**

| Characteristics                                          | n (%)       |
|----------------------------------------------------------|-------------|
| <b>Gender</b>                                            |             |
| Male                                                     | 220 (53.92) |
| Female                                                   | 188 (46.08) |
| <b>Age groups</b>                                        |             |
| 18~45                                                    | 30 (7.35)   |
| 45~59                                                    | 131 (32.11) |
| 60~74                                                    | 184 (45.10) |
| ≥75                                                      | 63 (15.44)  |
| <b>Urban vs. rural household registration</b>            |             |
| Urban                                                    | 210 (51.47) |
| Rural                                                    | 198 (48.53) |
| <b>Education</b>                                         |             |
| Unschooling                                              | 39 (9.56)   |
| Primary school                                           | 108 (26.47) |
| Junior high school                                       | 110 (26.96) |
| High school                                              | 89 (21.81)  |
| Junior college or higher vocational college              | 31 (7.60)   |
| Bachelor's degree or above                               | 31 (7.60)   |
| <b>Employment</b>                                        |             |
| Farmer                                                   | 105 (25.74) |
| Urban employee                                           | 140 (34.31) |
| Retiree                                                  | 112 (27.45) |
| Freelancers                                              | 32 (7.84)   |
| Unemployed                                               | 19 (4.66)   |
| <b>Type of insurance<sup>#</sup></b>                     |             |
| UEBMI                                                    | 201 (49.26) |
| URRBMI                                                   | 207 (50.74) |
| <b>Family monthly income (CNY)<sup>Δ</sup></b>           |             |
| < 2000                                                   | 83 (20.34)  |
| 2001~4000                                                | 81 (19.85)  |
| 4001~6000                                                | 93 (22.79)  |
| 6001~8000                                                | 69 (16.91)  |
| 8001~10000                                               | 41 (10.05)  |
| >10000                                                   | 41 (10.05)  |
| <b>Type of patients</b>                                  |             |
| Outpatients                                              | 83 (20.34)  |
| Inpatients                                               | 325 (79.66) |
| <b>Type of chronic diseases</b>                          |             |
| Hypertension                                             | 261 (63.97) |
| Diabetes                                                 | 89 (21.81)  |
| Both                                                     | 58 (14.22)  |
| <b>Comorbidities other than hypertension or diabetes</b> |             |
| Yes                                                      | 180 (44.12) |
| No                                                       | 228 (55.88) |
| <b>EQ-5D-5L index value<sup>*</sup></b>                  |             |
| ≤0.8                                                     | 127         |
| >0.8                                                     | 281         |

<sup>#</sup>1 UEBMI patients, 6 URRBMI patients also enrolled in commercial health insurance

1  
2  
3  
4  
5  
6  
7  
8  
9  
10  
11  
12  
13  
14  
15  
16  
17  
18  
19  
20  
21  
22  
23  
24  
25  
26  
27  
28  
29  
30  
31  
32  
33  
34  
35  
36  
37  
38  
39  
40  
41  
42  
43  
44  
45  
46  
47  
48  
49  
50  
51  
52  
53  
54  
55  
56  
57  
58  
59  
60

^ The average exchange rate between US Dollars and Chinese Yuan (CNY) in 2018 was 6.56.

\*The utility index was derived from the Chinese value sets.<sup>43</sup> Currently, the well accepted threshold of the EQ-5D-5L index value still lacks. However, in most cases, the EQ-5D-5L index value for patients with serious complications of diabetes and hypertension was equal to or less than 0.8, as shown by studies carried out in China.<sup>20 22</sup> EQ-5D-5L index value  $\leq 0.8$  group: Median 0.6718, IQR -0.0818~0.7998; EQ-5D-5L index value  $> 0.8$  group: Median 0.9507, IQR 0.8410~1.

## Regression analysis of the DCE data

Our analysis found that the study patients valued most the new technologies with never or rare incidence of serious adverse events ( $\beta = 0.884$ ,  $P < 0.01$ ), followed by the expected gains in health outcomes from the treatment ( $\beta = 0.809$ ,  $P < 0.01$ ) (Table 3). Likelihood of effective treatment was also a significant, positive predictor of patients' choice of new technologies ( $\beta = 0.455$ ,  $P < 0.01$ ) while out-of-pocket costs was a significant, negative predictor of patients' choice ( $\beta = -0.258$ ,  $P < 0.01$ ). In comparison, whether there were alternative technologies currently covered by insurance seemed not to be an important factor for the patients ( $P > 0.05$ ). Unobservable preference heterogeneity as indicated by the estimated standard deviation (SD) of the mean coefficients, were identified for four variables—expected gains in health outcomes from the treatment, likelihood of effective treatment, out-of-pocket costs, and lethal disease.

## Subgroup analysis by type of disease

Appendix 7 presented the results from the subgroup analysis by type of disease (hypertension versus diabetes). While the two groups had similar results, there were two notable differences. One was that, although out-of-pocket costs remained a significant, negative predictor, their coefficient for hypertension patients was  $-0.178$  ( $P < 0.05$ ), not as important as it was for patients with diabetes ( $\beta = -0.395$ ,  $P < 0.01$ ). The other was that the expected gains in health outcomes from the treatment seemed to be more important for diabetes patients ( $\beta = 0.965$ ,  $P < 0.01$ ) when compared with those who only had hypertension ( $\beta = 0.716$ ,  $P < 0.01$ ). The SD revealed coefficient heterogeneity within both subgroups for the random parameters of three variables—likelihood of effective

treatment, lethal disease, and out-of-pocket costs.

**Table 3. DCE results from mixed logit model**

| Attributes                                              | All patients    |                |
|---------------------------------------------------------|-----------------|----------------|
|                                                         | Mean(SE)        | SD(SE)         |
| Expected gains in health outcomes from the treatment    |                 |                |
| <i>Not as expected (reference)</i>                      |                 |                |
| <i>As expected</i>                                      | 0.809**(0.123)  | 0.554* (0.275) |
| Increasing likelihood of effective treatment (per 10%)  | 0.455**(0.044)  | 0.375**(0.055) |
| Severity of target disease                              |                 |                |
| <i>Not severe (reference)</i>                           |                 |                |
| <i>Severe</i>                                           | 0.291*(0.123)   | 0.316(0.431)   |
| <i>Lethal</i>                                           | 0.208(0.147)    | 1.264**(0.199) |
| Incidence of serious adverse events                     |                 |                |
| <i>Often (reference)</i>                                |                 |                |
| <i>Occasionally</i>                                     | 0.575**(0.116)  | 0.035(0.694)   |
| <i>Never or rarely</i>                                  | 0.884**(0.142)  | 0.900(0.206)   |
| Alternative technologies currently covered by insurance |                 |                |
| <i>Yes (reference)</i>                                  |                 |                |
| <i>No</i>                                               | 0.087(0.104)    | 0.095(0.501)   |
| Out-of-pocket costs (thousand CNY per month increase)   | -0.258**(0.061) | 0.898**(0.090) |
| Log likelihood                                          |                 | -1485.761      |
| Participants                                            |                 | 408            |
| Observations                                            |                 | 4896           |

\*P<0.05; \*\*P<0.01; SD: Standard Deviation estimates reflect preference heterogeneity in the participants; SE: Standard Error

### Subgroup analysis by type of insurance

Appendix 8 summarized the subgroup analyses by type of insurance. The expected gains in health outcomes from the treatment, likelihood of effective treatment, and low incidence of serious adverse events were significant, positive predictors of technology choice (P<0.01) for both URRBMI and UEBMI patients. Whether there were alternative technologies currently covered by insurance was statically insignificant for both groups (P>0.05). However, these two groups differed remarkably in two technology attributes. The coefficient of out-of-pocket costs was significant for URRBMI patients ( $\beta = -0.511$ , P<0.01), but not for UEBMI patients ( $\beta = -0.071$ , P>0.05). Severity of target disease also had significant coefficients for URRBMI patients (P<0.01), but not for UEBMI

1  
2  
3  
4  
5 patients.

6 We conducted further analysis of the UEBMI patients by excluding those UEBMI  
7 patients who enjoyed extra health insurance benefits, including who enjoyed public  
8 servant subsidies and the retired veteran cadres, and as indicated by Column (3), we  
9 found that out-of-pocket costs was a meaningful attribute for the remaining UEBMI  
10 patients ( $\beta = -0.211$ ,  $P < 0.05$ ) although not so important as viewed by URRBMI patients  
11 ( $\beta = -0.211$  vs.  $\beta = -0.511$ ). On the other hand, severity of target disease remained  
12 statistically non-significant after excluding those UEBMI patients with extra insurance  
13 benefits. Preference heterogeneity for the lowest incidence of serious adverse events  
14 was identified.  
15  
16  
17  
18  
19  
20  
21  
22  
23  
24  
25

## 26 **Subgroup analysis by HRQoL**

27 Appendix 9 demonstrated the results from the subgroup analysis by EQ-5D-5L  
28 index value, which was a meaningful measurement for HRQoL. Severity of target  
29 disease, both severe and lethal, was important for patients with EQ-5D-5L index value  
30 less than or equal to 0.8 ( $P < 0.01$ ). However, it was statistically non-significant for  
31 patients with EQ-5D-5L index value higher than 0.8 ( $P > 0.05$ ). Although patients'  
32 preferences for attributes including expected gains in health outcomes from the  
33 treatment, and incidence of serious adverse events were statistically significant for both  
34 groups, they were less important as viewed by the group with lower EQ-5D-5L index  
35 value. For patients with EQ-5D-5L index value less than or equal to 0.8, expected gains  
36 in health outcomes from the treatment had more variation in heterogeneity than other  
37 attributes. However, the heterogeneity for lethal disease was most significant for  
38 patients with EQ-5D-5L index value greater than 0.8.  
39  
40  
41  
42  
43  
44  
45  
46  
47  
48  
49  
50  
51

52 Since severity of target disease was an important attribute for URRBMI patients  
53 ( $P < 0.01$ ), but not for UEBMI patients. We did the chi-square test and results showed  
54 that the proportion of patients with lower EQ-5D-5L index value was significantly  
55 higher in URRBMI group ( $P < 0.01$ ) (Appendix 10).  
56  
57  
58  
59  
60

## Subgroup analysis by gender

We found that patients in both groups valued the new technologies with expected gains in health outcomes from the treatment, likelihood of effective treatment, low incidence of serious adverse event, and low out-of-pocket cost ( $P < 0.01$ ) (Appendix 11). However, the differences in preferences for attributes were not obvious between male and female.

## DISCUSSION

### Summary of the findings

Our study found that key technology attributes, including expected gains in health outcomes from the treatment, high likelihood of effective treatment, and low incidence of serious adverse events were significant, positive predictors of patient choice for health insurance coverage. These results hold for the entire study sample and for the subgroup analyses.

Out-of-pocket costs was a significant, negative predictor for the entire sample, showing that patients preferences decreased as the out-of-pocket costs increased. We also found that out-of-pocket costs was a significant, negative predictor for both hypertension patients and diabetes patients although they were less important for the former group than for the latter group.

When it came to different insurance types, we identified preference heterogeneity as previous studies of DCE suggested.<sup>44</sup> Specifically, we found that out-of-pocket costs was a significant, negative predictor for URRBMI patients' preference for insurance coverage while severity of target disease was a significant, positive predictor for this group of patients. But neither of these two attributes was a significant predictor for UEBMI patients. Our further analysis of the UEBMI patients by excluding those UEBMI patients who enjoyed extra health insurance benefits revealed that the remaining UEBMI patients regarded out-of-pocket costs as a significant, negative factor

1  
2  
3  
4  
5 for coverage although severity of target disease stayed statistically insignificant for  
6  
7 them.

8  
9 Patients' HRQoL was measured in our research and results suggested that patients  
10 with lower HRQoL tended to prefer new technologies which could have effects on  
11 severe or lethal diseases. The findings on importance of disease severity regarding  
12 patients with lower HRQoL coincide with URRBMI patients. In fact, the reimbursement  
13 level and the hospitalization rate of URRBMI patients were lower than UEBMI  
14 patients.<sup>15</sup> Further analysis showed the relatively higher proportion of URRBMI patients  
15 with lower HRQoL. In addition, our results indicate that gender is not a decisive factor  
16 for the preference of new technologies for reimbursement.  
17  
18

19  
20 The degree to which respondent preferences were heterogeneous was described by  
21 the estimated SD around each mean preference estimate. Heterogeneity was found  
22 mainly for four variables—expected gains in health outcomes from the treatment,  
23 likelihood of effective treatment, out-of-pocket costs, and lethal disease. Although  
24 heterogeneity existed, the preferences for new technologies with expected gains in  
25 health outcomes from the treatment, and likelihood of effective treatment remained  
26 significant in all patients and each subgroup, suggesting that these attributes were  
27 generally valued by patients. Variations in preferences over out-of-pocket costs and  
28 lethal disease had implications for the optimal design of insurance reimbursement  
29 schemes and should be analyzed in future research.  
30  
31  
32  
33  
34  
35  
36  
37  
38  
39  
40  
41  
42  
43

## 44 **Comparison with other studies**

45  
46 Our findings of patients' valuing most the effectiveness and safety of medical  
47 technologies were consistent with the results by prior studies from other countries  
48 which aimed to investigate patients' preferences for the treatment of chronic  
49 diseases.<sup>45-49</sup> Our study confirmed that patients preferred new technologies which could  
50 increase health benefits and minimize potential risks.  
51  
52  
53  
54

55  
56 However, variation in patient preferences existed and mainly depended on patients'  
57 own feelings of the disease. Previous research found that the median hospitalization cost  
58  
59  
60

1  
2  
3  
4  
5 for patients with hypertension was lower than patients with diabetes,<sup>50 51</sup> which  
6 supported our findings that out-of-pocket costs was not as important for hypertension  
7 patients as they were for patients with diabetes.  
8  
9

10 We also identified preference heterogeneity among patients with different types of  
11 insurance. Although China's successful health insurance expansion during the past  
12 decade led to the country's universal health insurance coverage, variations in benefit  
13 coverage were manifested among different health insurance schemes,<sup>12</sup> resulting in  
14 inequalities in accessibility and affordability of medical services.<sup>52</sup> Such inequalities  
15 affected patient preferences across different types of insurance. For example, we found  
16 that out-of-pocket costs was a significant, negative predictor for URRBMI patients'  
17 preference, but not for all the UEBMI patients in our sample. The finding reflected the  
18 fact that, compared with URRBMI, UEBMI had better benefit coverage and higher  
19 reimbursement level, especially for those UEBMI patients with extra benefits. The  
20 finding also fitted into the big picture of disparities across insurance schemes in China  
21 that were illustrated by prior research.  
22  
23  
24  
25  
26  
27  
28  
29  
30  
31  
32  
33

34 We found that URRBMI patients attached importance to severity of disease. We  
35 also found the association between lower HRQoL and preference on technologies  
36 treating severe or lethal disease. Previous studies found that chronic disease patients  
37 with URRBMI had lower health service utilization.<sup>53</sup> Furthermore, URRBMI patients  
38 had significantly higher adjusted in-hospital mortality rate and shorter length of stay  
39 when compared with concurrent UEBMI patients.<sup>54 55</sup> These findings suggested that a  
40 plausible explanation for the importance of severity of disease for URRBMI patients  
41 might be mainly due to their perception of HRQoL and their concern about the potential  
42 severe or lethal consequences of chronic diseases.  
43  
44  
45  
46  
47  
48  
49  
50

## 51 **Implications of the study findings**

52 The rising prevalence of chronic diseases in China has major implications on its  
53 ability to provide timely, acceptable and affordable healthcare service for its citizens. To  
54 meet the demand for new medical technologies for treating chronic diseases, it is  
55  
56  
57  
58  
59  
60

1  
2  
3  
4  
5 important for China's policy-makers to consider patient preferences when they decide  
6 on insurance coverage of new medical technologies. Specifically our findings that  
7 patients valued most new medical technologies with substantial health benefits and low  
8 risks suggested such technologies should be the priority of health insurance coverage.  
9 Policy-makers are suggested to make evidence-based comparisons among technologies  
10 according to the attributes patients preferred to achieve patient-centered and  
11 evidence-informed reimbursement decision-making.  
12  
13  
14  
15  
16  
17

18 Our findings that out-of-pocket costs was a significant concern for URRBMI  
19 patients but not for all the UEBMI patients suggested that policymakers need to take  
20 further efforts to reduce disparities in benefit coverage and reimbursement level  
21 between these two types of insurance and between subgroups with UEBMI. The efforts  
22 will not only enhance financial protections for URRBMI patients and subgroups within  
23 UEBMI patients, but also contribute to China's long-term goal of equalizing benefit  
24 coverage across insurance programs.<sup>10</sup>  
25  
26  
27  
28  
29  
30  
31

32 We found that patients did not care about alternative technologies currently covered  
33 by insurance. However, it is an essential attribute in reimbursement decision-making.  
34 Decision makers need to compare the new technologies with available alternative  
35 technologies and determine whether to cover new medical technologies or obsolete the  
36 alternatives. Policymakers and clinicians may need to implement communication  
37 strategies to improve patients' understanding about the alternative therapies and  
38 reimbursement policies under the current insurance system to increase appropriate use  
39 of the existing therapies.  
40  
41  
42  
43  
44  
45  
46  
47

## 48 **Strengths and limitations**

49  
50 Our study used DCE to elicit preferences from chronic disease patients on  
51 insurance coverage of new medical technologies in China. We identified preference  
52 heterogeneity among patients with different types of insurance. Patients' HRQoL was  
53 measured and the potential impact on preferences for reimbursement of new  
54 technologies was analyzed. Our research was helpful for applying a patient-centered  
55  
56  
57  
58  
59  
60



1  
2  
3  
4  
5 approach to policy-making and generated evidence that could inform insurance  
6 coverage decision-making.  
7

8  
9         Nevertheless, there are several limitations with our study. First, our samples were  
10 from tertiary hospitals in Jiangsu Province. Those patients who sought medical service  
11 from tertiary hospitals generally have serious and/or complex medical conditions with  
12 higher demand for healthcare services than other patients, and may cautiously consider  
13 the issue of medical insurance coverage and reimbursement. Jiangsu is an eastern,  
14 coastal province and one of the most economically developed regions in China. Future  
15 studies are needed to have a nationally representative sample by including patients at  
16 secondary and primary hospitals, and especially by including the economically  
17 underdeveloped regions in China.  
18  
19

20  
21         Second, our study included patients with a history of diabetes or hypertension. Due  
22 to differences in disease nature and characteristics, the results may not represent  
23 preferences from patients with other types of chronic diseases, although prior DCEs<sup>45-49</sup>  
24 made conclusions that were similar to ours in terms of the relative importance of  
25 technology attributes regarding benefits and risks. Future studies need to enroll patients  
26 with other diseases, and performing subgroup analysis to find variations of patient  
27 preferences across different types of diseases.  
28  
29

30  
31         Third, there were only 43 UEBMI patients who enjoyed additional privileges of  
32 health insurance, and the limited sample size prevented us from conducting a separate  
33 analysis of this subgroup. Further research is still needed to focus on these subgroups.  
34  
35  
36  
37  
38  
39

## 40 41 42 43 44 45 46 47 48 49 **CONCLUSION**

50  
51         Chronic disease patients valued most the health benefits and risks of new  
52 technologies, which were closely related to their own perception and feelings.  
53 Policymakers need to consider new technologies with high therapeutic effectiveness and  
54 benefit and low risk for treating chronic diseases as a priority for health insurance  
55  
56  
57  
58  
59  
60

1  
2  
3  
4  
5 coverage. Further efforts should also be made to reduce the gaps in benefit coverage and  
6  
7 reimbursement level between insurance schemes to promote equal access to healthcare  
8  
9 services in China.

### 10 11 12 13 **Ethics approval**

14  
15 This study, including the patient consent process, was approved by the Medical  
16  
17 Ethics Committee in Affiliated Hospitals of Nantong University (Ethical  
18  
19 Approval-2016031), and conforms to the ethical guidelines of the Declaration of  
20  
21 Helsinki.

### 22 23 24 **Acknowledgments**

25  
26 We acknowledge the important contributions of our interviewers who did  
27  
28 one-to-one, face-to-face interviews with the patients. We are also grateful to all the  
29  
30 patients for their time and efforts. We sincerely thank reviewers for providing us  
31  
32 valuable comments and suggestions on drafts of the manuscript.

33  
34 At the time of drafting the manuscript, Jinsong Geng was a fellow at the  
35  
36 Fellowship in Health Policy and Insurance Research, Department of Population  
37  
38 Medicine, Harvard Medical School and Harvard Pilgrim Healthcare Institute.

### 39 40 41 **Author contributions**

42  
43 Geng JS, Chen XW, and Yu H led the design and analysis of the discrete choice  
44  
45 experiment. Geng JS, Chen XW contributed to literature search and data interpretation.  
46  
47 Bao HN, Qian DM, Shao YT contributed to implementing the discrete choice  
48  
49 experiment. Geng JS and Yu H performed statistical analysis and wrote the manuscript.

### 50 51 52 **Funding**

53  
54 This work was supported by National Natural Science Foundation of China (Grant  
55  
56 No. 71603138) and Jiangsu Overseas Visiting Scholar Program for University  
57  
58 Prominent Young & Middle-aged Teachers and Presidents.

The funders provided financial support for the conduct of the study. The funders had no role in the design, implementation, data collection and statistical analysis, data interpretation, or writing of the manuscript.

## Disclosure

The authors report no conflict of interest in this research.

## Data sharing statement

Data will be available upon reasonable request to corresponding author.

## References

1. World Health Organization. *Global action plan for the prevention and control of noncommunicable diseases 2013-2020*. Geneva: World Health Assembly, 2013:5-9.
2. Lu J, Lu Y, Wang X, *et al*. Prevalence, awareness, treatment, and control of hypertension in China: data from 1.7 million adults in a population-based screening study (China PEACE Million Persons Project). *Lancet* 2017;390:2549-58.
3. Wang L, Gao P, Zhang M, *et al*. Prevalence and ethnic pattern of diabetes and prediabetes in China in 2013. *JAMA* 2017;317:2515-23.
4. Adriaanse MC, Drewes HW, van der Heide I, *et al*. The impact of comorbid chronic conditions on quality of life in type 2 diabetes patients. *Qual Life Res* 2016;25:175-82.
5. Aubert CE, Fankhauser N, Marques-Vidal P, *et al*. Patterns of multimorbidity in internal medicine patients in Swiss university hospitals: a multicentre cohort study. *Swiss Med Wkly* 2019;149:w20094.
6. Wang J, Ma JJ, Liu J, *et al*. Prevalence and risk factors of comorbidities among hypertensive patients in China. *Int J Med Sci* 2017;14:201-12.
7. Bloom DE, Chen S, Kuhn M, *et al*. The economic burden of chronic diseases: estimates and projections for China, Japan, and South Korea. *JEoA* 2018:100163.
8. Yip W, Fu H, Chen AT, *et al*. 10 years of health-care reform in China: progress and gaps in Universal Health Coverage. *Lancet* 2019;394:1192-204.
9. China's National Healthcare Security Administration. *China Healthcare Security Diagnosis Related Groups (CHS-DRG)*. Beijing, 2019:44-46.10. Yu H. Universal health insurance coverage for 1.3 billion people: what accounts for China's success? *Health Policy* 2015;119:1145-52.
10. Yu H. Universal health insurance coverage for 1.3 billion people: what accounts for China's success? *Health Policy* 2015;119:1145-52.
11. Li Y, Zhao Y, Yi D, *et al*. Differences exist across insurance schemes in China post-consolidation. *PloS One* 2017;12:e0187100.
12. Xiong X, Zhang Z, Ren J, *et al*. Impact of universal medical insurance system on the

1  
2  
3  
4 accessibility of medical service supply and affordability of patients in China. *PloS One*  
5 2018;13:e0193273.

6  
7 13. Xian W, Xu X, Li J, *et al.* Health care inequality under different medical insurance schemes  
8 in a socioeconomically underdeveloped region of China: a propensity score matching analysis. *BMC*  
9 *Public Health* 2019;19:1373.

10  
11 14. The State Council of the People's Republic of China. Opinion of the State Council on  
12 integrating the basic health insurance system for urban and rural residents, 2016. Available:  
13 [http://www.gov.cn/zhengce/content/2016-01/12/content\\_10582.htm](http://www.gov.cn/zhengce/content/2016-01/12/content_10582.htm)

14  
15 15. China's National Healthcare Security Administration. Statistical Bulletin of National Social  
16 Medical Insurance Development in 2018. Available:  
17 [http://www.nhsa.gov.cn/art/2019/6/30/art\\_7\\_1477.html](http://www.nhsa.gov.cn/art/2019/6/30/art_7_1477.html)

18  
19 16. General Office of the State Council of the People's Republic of China. Notice of the  
20 General Office of the State Council on transmitting the opinions from the Ministry of Labor and  
21 Social Security and the Ministry of Finance on the implementation of medical subsidies for national  
22 civil servants, 2000. Available: [http://www.gov.cn/gongbao/content/2000/content\\_60249.htm](http://www.gov.cn/gongbao/content/2000/content_60249.htm)

23  
24 17. Wuxi No.2 People's Hospital. Medical insurance policy (the latest version of 2020).  
25 Available: <https://www.wx2h.com/ywzc/ywzcdetail/index/id/4/tid/6.html>.

26  
27 18. Makovski TT, Schmitz S, Zeegers MP, *et al.* Multimorbidity and quality of life: systematic  
28 literature review and meta-analysis. *Ageing Res Rev* 2019;53:100903.

29  
30 19. van Reenen M, Janssen B. *EQ-5D-5L user guide: basic information on how to use the*  
31 *EQ-5D-5L instrument*. Rotterdam: EuroQol Research Foundation, 2015.

32  
33 20. Pan CW, Sun HP, Zhou HJ, *et al.* Valuing health-related quality of life in type 2 diabetes  
34 patients in China. *Med Decis Making* 2016;36:234-41.

35  
36 21. Wang P, Luo N, Tai ES, *et al.* The EQ-5D-5L is more discriminative than the EQ-5D-3L in  
37 patients with diabetes in Singapore. *Value Health Reg Issues* 2016;9:57-62.

38  
39 22. Liang Z, Zhang T, Lin T, *et al.* Health-related quality of life among rural men and women  
40 with hypertension: assessment by the EQ-5D-5L in Jiangsu, China. *Qual Life Res* 2019;28:2069-80.

41  
42 23. Institute of Medicine Committee on Quality of Health Care in America. *Crossing the*  
43 *quality chasm: a new health system for the 21st century*. Washington, D.C.: The National Academies  
44 Press, 2001.

45  
46 24. Lancsar E, Fiebig DG, Hole AR. Discrete choice experiments: a guide to model  
47 specification, estimation and software. *Pharmacoeconomics* 2017;35:697-716.

48  
49 25. Clark MD, Determann D, Petrou S, *et al.* Discrete choice experiments in health economics:  
50 a review of the literature. *Pharmacoeconomics* 2014;32:883-902.

51  
52 26. Ryan M, Kolstad J, Rockers P, *et al.* *How to conduct a discrete choice experiment for*  
53 *health workforce recruitment and retention in remote and rural areas: a user guide with case*  
54 *studies*. Geneva:World Health Organization Press, 2012.

55  
56 27. Goetghebeur MM, Wagner M, Khoury H, *et al.* Evidence and value: impact on  
57 DEcisionMaking--the EVIDEM framework and potential applications. *BMC Health Serv Res*  
58 2008;8:270.

59  
60 28. Chen XW, Chen Q, Geng JS, *et al.* The application of multi-criteria decision analysis in  
61 medical insurance reimbursement: a systematic review. *Chinese Health Resources* 2018;21:218-23.

29. Geng JS, Chen XW, Yu XL, *et al.* Study on the evidence-based decision-making framework

1  
2  
3  
4 for reimbursement of new technologies in view of EVIDEM. *Chinese Journal of Health Policy*  
5 2018;11:50-54.

6  
7 30. Hensher DA, Rose JM, Greene WH. *Applied Choice Analysis (2nd Edition)*. Cambridge:  
8 Cambridge University Press, 2015.

9  
10 31. Reed Johnson F, Lancsar E, Marshall D, *et al*. Constructing experimental designs for  
11 discrete-choice experiments: report of the ISPOR Conjoint Analysis Experimental Design Good  
12 Research Practices Task Force. *Value Health* 2013;16:3-13.

13  
14 32. Nichols E, O'Hara NN, Degani Y, *et al*. Patient preferences for nutritional supplementation  
15 to improve fracture healing: a discrete choice experiment. *BMJ Open* 2018;8:e019685.

16  
17 33. van Dijk JD, Groothuis-Oudshoorn CG, Marshall DA, *et al*. An empirical comparison of  
18 discrete choice experiment and best-worst scaling to estimate stakeholders' risk tolerance for hip  
19 replacement surgery. *Value Health* 2016;19:316-22.

20  
21 34. Bhattarai N, McMeekin P, Price CI, *et al*. Preferences for centralised emergency medical  
22 services: discrete choice experiment. *BMJ Open* 2019;9:e030966.

23  
24 35. Kløjgaard ME, Bech M, Søgaard R. Designing a stated choice experiment: the value of a  
25 qualitative process. *J Choice Model* 2012;5:1-18.

26 36. Dhar R, Simonson I. The Effect of Forced Choice on Choice. *JMR* 2003;40:146-60.

27  
28 37. de Bekker-Grob EW, Donkers B, Jonker MF, *et al*. Sample size requirements for  
29 discrete-choice experiments in healthcare: a practical guide. *Patient* 2015;8:373-84.

30  
31 38. Vanniyasingam T, Cunningham CE, Foster G, *et al*. Simulation study to determine the  
32 impact of different design features on design efficiency in discrete choice experiments. *BMJ Open*  
33 2016;6:e011985.

34  
35 39. Oluboyede Y, Ternent L, Vale L, *et al*. Using a discrete-choice experiment to estimate the  
36 preferences of clinical practitioners for a novel non-invasive device for diagnosis of peripheral  
37 arterial disease in primary care. *Pharmacoecon Open* 2019;3:571-81.

38  
39 40. Shanahan M, Seddon J, Ritter A, *et al*. Valuing families' preferences for drug treatment: a  
40 discrete choice experiment. *Addiction* 2020;115:690-99.

41  
42 41. Hauber AB, Gonzalez JM, Groothuis-Oudshoorn CG, *et al*. Statistical methods for the  
43 analysis of discrete choice experiments: a report of the ISPOR Conjoint Analysis Good Research  
44 Practices Task Force. *Value Health* 2016;19:300-15.

45  
46 42. Kløjgaard ME, Manniche C, Pedersen LB, *et al*. Patient preferences for treatment of low  
47 back pain-a discrete choice experiment. *Value Health* 2014;17:390-6.

48  
49 43. Luo N, Liu G, Li M, *et al*. Estimating an EQ-5D-5L Value Set for China. *Value Health*  
50 2017;20:662-69.

51  
52 44. de Bekker-Grob EW, Swait JD, Kassahun HT, *et al*. Are healthcare choices predictable?  
53 The impact of discrete choice experiment designs and models. *Value Health* 2019;22:1050-62.

54  
55 45. Brockelmann PJ, McMullen S, Wilson JB, *et al*. Patient and physician preferences for  
56 first-line treatment of classical Hodgkin lymphoma in Germany, France and the United Kingdom. *Br*  
57 *J Haematol* 2019;184:202-14.

58  
59 46. Forsander G, Stallknecht S, Samuelsson U, *et al*. Preferences for treatment among  
60 adolescents with Type 1 diabetes: a national study using a discrete choice experiment model. *Diabet*  
*Med* 2018;35:621-29.

47. Havrilesky LJ, Lim S, Ehrisman JA, *et al*. Patient preferences for maintenance PARP

1  
2  
3  
4 inhibitor therapy in ovarian cancer treatment. *Gynecol Oncol* 2020 doi:  
5 10.1016/j.ygyno.2020.01.026.

6  
7 48. Ho KA, Acar M, Puig A, *et al.* What do Australian patients with inflammatory arthritis  
8 value in treatment? A discrete choice experiment. *Clin Rheumatol* 2019 doi:  
9 10.1007/s10067-019-04843-4.

10  
11 49. Thieu VT, Robinson S, Kennedy-Martin T, *et al.* Patient preferences for glucagon-like  
12 peptide 1 receptor-agonist treatment attributes. *Patient Prefer Adherence* 2019;13:561-76.

13  
14 50. Mutowo MP, Lorgelly PK, Laxy M, *et al.* The hospitalization costs of diabetes and  
15 hypertension complications in Zimbabwe: estimations and correlations. *J Diabetes Res*  
16 2016;2016:9754230.

17  
18 51. Rosa MQM, Rosa RDS, Correia MG, *et al.* Disease and economic burden of  
19 hospitalizations attributable to diabetes mellitus and its complications: a nationwide study in Brazil.  
20 *Int J Environ Res Public Health* 2018;15: E294.

21  
22 52. Zhao C, Wang C, Shen C, *et al.* China's achievements and challenges in improving health  
23 insurance coverage. *Drug Discov Ther* 2018;12:1-6.

24  
25 53. Xie X, Wu Q, Hao Y, *et al.* Identifying determinants of socioeconomic inequality in health  
26 service utilization among patients with chronic non-communicable diseases in China. *PloS One*  
27 2014;9:e100231.

28  
29 54. Chen H, Shi L, Xue M, *et al.* Geographic variations in in-hospital mortality and use of  
30 percutaneous coronary intervention following acute myocardial infarction in China: a nationwide  
31 cross-sectional analysis. *J Am Heart Assoc* 2018;7:e008131.

32  
33 55. Lin X, Cai M, Tao H, *et al.* Insurance status, in-hospital mortality and length of stay in  
34 hospitalised patients in Shanxi, China: a cross-sectional study. *BMJ Open* 2017;7:e015884.

## Appendix 1: Explanations to attributes and levels

Investigators were required to convey the following definitions to patients:

- ‘Expected gains in health outcomes from the treatment’ means the ideal treatment objectives mentioned in domestic evidence-based guidelines for specific patients can be achieved; ‘Not as expected’ indicates that there can be some treatment effects, however, the ideal treatment targets cannot be fully achieved. This attribute is the qualitative aspect of effectiveness.
- Increasingly probability of the effective treatment: ‘effective treatment’ equals to the attribute ‘gains in health outcomes from the treatment’ in choice sets: a new medical technology which can reach its expected gains in health outcomes is effective. The attribute ‘increasingly probability of the effective treatment’ is the quantitative aspect of effectiveness.
- For the severity of target disease, ‘not severe’ means the target disease of new technology is not fatal and has no impact on patients’ quality of life; ‘severe’ suggests the target disease of new technology is not fatal, however, patients’ quality of life was significantly reduced; ‘lethal’ means the target disease of new technology is fatal and patients will probably die from the disease.
- For incidence of serious adverse events, ‘often’ equals to or a little bit higher than 10%; occasionally was about 3%.
- ‘Serious adverse events’ means life-threatening adverse events caused by the new technology, like severe hypoglycemia, severe hypersensitivity reaction, kidney or liver damage, etc.
- Alternative technologies already reimbursed have similar effectiveness and safety to the new technology (Level: Yes); no alternatives already reimbursed have similar effectiveness and safety to the new technology (Level: No).
- The cost of the technology is the out-of-pocket costs if not reimbursed. The hypothesis is that the technology never been reimbursed unless you make the choice.

## Appendix 2: Examples of DCE choice sets

Medical interventions A and B are used to treat chronic diseases, and currently they were not covered in the social insurance reimbursement list. If you are forced to make a choice, which intervention should be reimbursed by social insurance? There is no right or wrong answers; please make the choice according to your own opinion.

| Attributes                                                    | New technology A                                                                                                 | New technology B                                                                                              |
|---------------------------------------------------------------|------------------------------------------------------------------------------------------------------------------|---------------------------------------------------------------------------------------------------------------|
| Expected gains in health outcomes from the treatment          | <br><b>As expected</b>          | <br><b>Not as expected</b> |
| Likelihood of effective treatment                             | <br><b>30%</b>                 | <br><b>90%</b>            |
| Severity of target disease                                    | <br><b>Severe, not lethal</b> | <br><b>Not severe</b>    |
| Incidence of serious adverse events (life-threatening)        | <br><b>Never or rarely</b>    | <br><b>Often</b>         |
| Alternative technologies currently covered by insurance       | <b>Yes</b>                                                                                                       | <b>No</b>                                                                                                     |
| Out-of-pocket costs for new technology (if not reimbursed)    | <b>1500 CNY per month</b>                                                                                        | <b>3500 CNY per month</b>                                                                                     |
| Which one should be covered by medical insurance? Your choice | <input data-bbox="754 1901 836 1962" type="checkbox"/>                                                           | <input data-bbox="1129 1901 1211 1962" type="checkbox"/>                                                      |



### Appendix 3: Evaluation of confidence

The following statements refer to the questions that asked about how confident you feel in completing the choice sets. Please select your confident level from 1 to 10 and give a tick '✓' in the score to represent your selection:

0: not confident  
at all

|   |   |   |   |   |   |   |   |   |   |    |
|---|---|---|---|---|---|---|---|---|---|----|
| 0 | 1 | 2 | 3 | 4 | 5 | 6 | 7 | 8 | 9 | 10 |
|---|---|---|---|---|---|---|---|---|---|----|

10: extremely  
confident

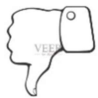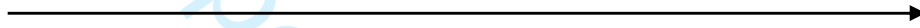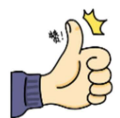

**Appendix 4: Number of patients included in sample hospitals**

Supplemental Table 1 Number of patients in each sample hospital

| Name of hospital                            | City    | Number of patients |
|---------------------------------------------|---------|--------------------|
| Taizhou People's Hospital                   | Taizhou | 60                 |
| Jiangyin People's Hospital                  | Wuxi    | 40                 |
| First People's Hospital of Wujiang District | Suzhou  | 60                 |
| Nantong First People's Hospital             | Nantong | 23                 |
| Nantong Third People's Hospital             | Nantong | 100                |
| Affiliated Hospital of Nantong University   | Nantong | 125                |

## Appendix 5: Distribution of patients by type of disease and type of insurance

Supplemental Table 2. Types of insurance for patients with hypertension and diabetes

| Disease      | URRBMI | UEBMI |
|--------------|--------|-------|
| Hypertension | 130    | 131   |
| Diabetes     | 49     | 40    |
| Total        | 179    | 171   |

Urban and Rural Residents Basic Medical Insurance (URRBMI); Urban Employees Basic Medical Insurance (UEBMI)

$$\chi^2 = 0.732 \quad P = 0.392$$

Supplemental Table 3. Types of benefits for UEBMI patients with hypertension and diabetes

| Disease      | UEBMI with extra benefits | UEBMI without extra benefits |
|--------------|---------------------------|------------------------------|
| Hypertension | 27                        | 104                          |
| Diabetes     | 11                        | 29                           |
| Total        | 38                        | 133                          |

$$\chi^2 = 0.842 \quad P = 0.359$$

**Appendix 6: Types of chronic commodities for the included patients**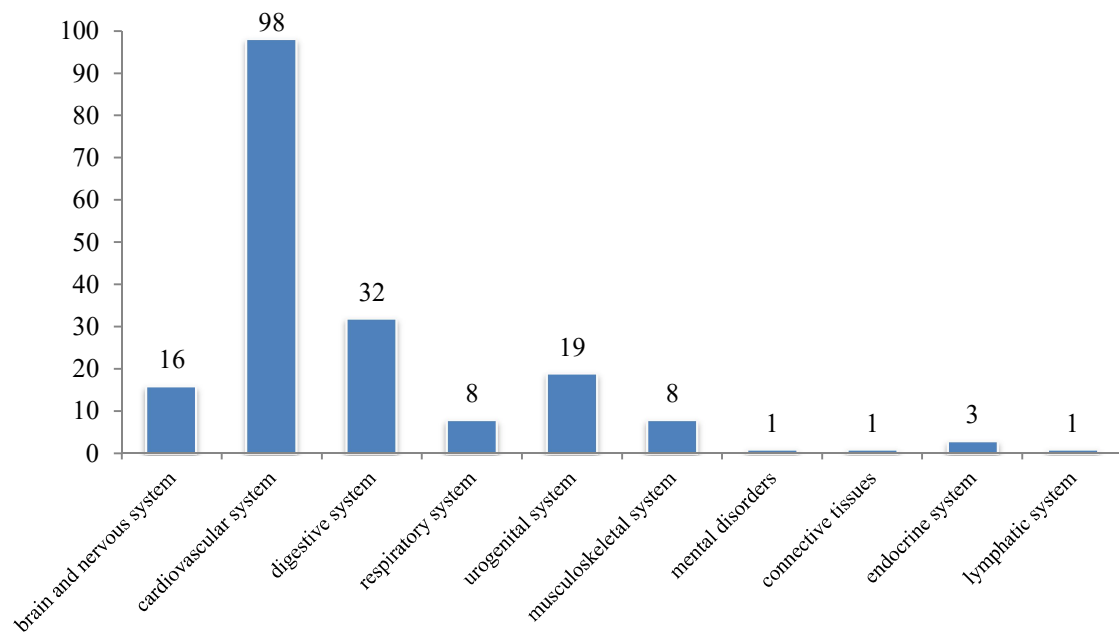

Supplemental Figure 1 Number of patients with chronic commodities

## Appendix 7: Subgroup analysis according to disease

Supplemental Table 4. Subgroup analysis according to disease

| Attributes                                              | Hypertension    |                 | Diabetes         |                 |
|---------------------------------------------------------|-----------------|-----------------|------------------|-----------------|
|                                                         | Mean (SE)       | SD (SE)         | Mean (SE)        | SD (SE)         |
| Expected gains in health outcomes from the treatment    |                 |                 |                  |                 |
| <i>Not as expected (reference)</i>                      |                 |                 |                  |                 |
| <i>As expected</i>                                      | 0.716** (0.158) | 0.443(0.496)    | 0.965** (0.259)  | 0.125(0.497)    |
| Increasing likelihood of effective treatment (per 10%)  | 0.519** (0.064) | 0.375** (0.086) | 0.420** (0.093)  | 0.401** (0.119) |
| Severity of target disease                              |                 |                 |                  |                 |
| <i>Not severe (reference)</i>                           |                 |                 |                  |                 |
| <i>Severe</i>                                           | 0.328* (0.162)  | 0.056(0.495)    | 0.100(0.273)     | 0.441(0.834)    |
| <i>Lethal</i>                                           | 0.215(0.196)    | 1.189** (0.276) | 0.304(0.311)     | 1.146** (0.395) |
| Incidence of serious adverse events                     |                 |                 |                  |                 |
| <i>Often (reference)</i>                                |                 |                 |                  |                 |
| <i>Occasionally</i>                                     | 0.767** (0.164) | 0.014* (0.381)  | 0.553* (0.266)   | 0.337(0.548)    |
| <i>Never or rarely</i>                                  | 0.995** (0.195) | 1.126(0.271)    | 0.938** (0.349)  | 0.989* (0.459)  |
| Alternative technologies currently covered by insurance |                 |                 |                  |                 |
| <i>Yes (reference)</i>                                  |                 |                 |                  |                 |
| <i>No</i>                                               | 0.152(0.158)    | 0.978** (0.315) | 0.089(0.248)     | 0.019(0.383)    |
| Out-of-pocket costs (thousand CNY per month increase)   | -0.178* (0.084) | 1.024** (0.128) | -0.395** (0.126) | 0.774** (0.190) |
| Log likelihood                                          |                 | -929.220        |                  | -311.029        |
| Participants                                            |                 | 261             |                  | 89              |
| Observations                                            |                 | 2484            |                  | 2412            |

\*P<0.05; \*\*P<0.01; SD: Standard Deviation estimates reflect preference heterogeneity in the participants; SE: Standard Error

Patients who had both hypertension and diabetes were excluded to ensure the homogeneity.

## Appendix 8: Subgroup analysis according to insurance types

Supplemental Table 5. Subgroup analysis according to insurance types

| Attributes                                              | (1)<br>URRBMI patients |                 | (2)<br>UEBMI patients |                 | (3)<br>UEBMI patients without extra<br>insurance benefits <sup>#</sup> |                 |
|---------------------------------------------------------|------------------------|-----------------|-----------------------|-----------------|------------------------------------------------------------------------|-----------------|
|                                                         | Mean (SE)              | SD (SE)         | Mean (SE)             | SD (SE)         | Mean (SE)                                                              | SD (SE)         |
| Expected gains in health outcomes from the treatment    |                        |                 |                       |                 |                                                                        |                 |
| <i>Not as expected (reference)</i>                      |                        |                 |                       |                 |                                                                        |                 |
| <i>As expected</i>                                      | 0.977** (0.204)        | 0.811* (0.325)  | 0.732** (0.166)       | 0.320 (0.641)   | 0.652** (0.193)                                                        | 0.609 (0.420)   |
| Increasing likelihood of effective treatment (per 10%)  | 0.512** (0.069)        | 0.384** (0.075) | 0.444** (0.066)       | 0.383** (0.082) | 0.450** (0.074)                                                        | 0.271** (0.085) |
| Severity of target disease                              |                        |                 |                       |                 |                                                                        |                 |
| <i>Not severe (reference)</i>                           |                        |                 |                       |                 |                                                                        |                 |
| <i>Severe</i>                                           | 0.519** (0.189)        | 0.247 (0.887)   | 0.062 (0.171)         | 0.138 (0.609)   | -0.09 (0.194)                                                          | 0.193 (0.615)   |
| <i>Lethal</i>                                           | 0.761** (0.230)        | 1.112** (0.316) | -0.217 (0.211)        | 1.321** (0.289) | -0.385 (0.242)                                                         | 1.387** (0.333) |
| Incidence of serious adverse events                     |                        |                 |                       |                 |                                                                        |                 |
| <i>Often (reference)</i>                                |                        |                 |                       |                 |                                                                        |                 |
| <i>Occasionally</i>                                     | 0.704** (0.181)        | 0.08 (0.389)    | 0.462** (0.165)       | 0.501 (0.401)   | 0.526** (0.196)                                                        | 0.70 (0.381)    |
| <i>Never or rarely</i>                                  | 0.928** (0.214)        | 1.013** (0.301) | 0.876** (0.206)       | 0.881** (0.317) | 0.792** (0.232)                                                        | 0.858* (0.361)  |
| Alternative technologies currently covered by insurance |                        |                 |                       |                 |                                                                        |                 |
| <i>Yes (reference)</i>                                  |                        |                 |                       |                 |                                                                        |                 |
| <i>No</i>                                               | 0.142 (0.161)          | 0.242 (0.516)   | -0.003 (0.148)        | 0.556 (0.380)   | -0.143 (0.158)                                                         | 0.106 (0.679)   |
| Out-of-pocket costs (thousand CNY per month increase)   | -0.511** (0.112)       | 1.041** (0.152) | -0.071 (0.078)        | 0.818** (0.125) | -0.211* (0.090)                                                        | 0.790** (0.146) |
| Log likelihood                                          |                        | -706.268        |                       | -707.710        |                                                                        | -562.183        |
| Participants                                            |                        | 207             |                       | 201             |                                                                        | 158             |
| Observations                                            |                        | 2484            |                       | 2412            |                                                                        | 1896            |

\*P<0.05; \*\*P<0.01; SD: Standard Deviation estimates reflect preference heterogeneity in the participants; SE: Standard Error;

<sup>#</sup>This subgroup did not include those UEBMI patients who enjoyed extra health insurance benefits.

## Appendix 9: Subgroup analysis according to health related quality of life

Supplemental Table 6. Subgroup analysis according to health related quality of life (HRQoL)

| Attributes                                              | EQ-5D-5L index value $\leq 0.8$ |                 | EQ-5D-5L index value $> 0.8$ |                 |
|---------------------------------------------------------|---------------------------------|-----------------|------------------------------|-----------------|
|                                                         | Mean (SE)                       | SD (SE)         | Mean (SE)                    | SD (SE)         |
| Expected gains in health outcomes from the treatment    |                                 |                 |                              |                 |
| <i>Not as expected (reference)</i>                      |                                 |                 |                              |                 |
| <i>As expected</i>                                      | 0.554* (0.228)                  | 0.971* (0.423)  | 0.953** (0.165)              | 0.466 (0.493)   |
| Increasing likelihood of effective treatment (per 10%)  | 0.606** (0.093)                 | 0.450** (0.098) | 0.405** (0.054)              | 0.320** (0.074) |
| Severity of target disease                              |                                 |                 |                              |                 |
| <i>Not severe (reference)</i>                           |                                 |                 |                              |                 |
| <i>Severe</i>                                           | 0.874** (0.240)                 | 0.043 (0.408)   | 0.106 (0.156)                | 0.349 (0.533)   |
| <i>Lethal</i>                                           | 0.724** (0.254)                 | 0.773* (0.347)  | -0.064 (0.195)               | 1.499** (0.281) |
| Incidence of serious adverse events                     |                                 |                 |                              |                 |
| <i>Often (reference)</i>                                |                                 |                 |                              |                 |
| <i>Occasionally</i>                                     | 0.131 (0.202)                   | 0.007* (0.461)  | 0.815** (0.166)              | 0.431 (0.357)   |
| <i>Never or rarely</i>                                  | 0.516* (0.236)                  | 0.453 (0.519)   | 1.120** (0.200)              | 1.103** (0.275) |
| Alternative technologies currently covered by insurance |                                 |                 |                              |                 |
| <i>Yes (reference)</i>                                  |                                 |                 |                              |                 |
| <i>No</i>                                               | 0.007 (0.179)                   | 0.142 (0.466)   | -0.093 (0.140)               | 0.560 (0.458)   |
| Out-of-pocket costs (thousand CNY per month increase)   | -0.233* (0.109)                 | 0.909** (0.157) | -0.283** (0.083)             | 0.979** (0.135) |
| Log likelihood                                          |                                 | -438.402        |                              | -954.540        |
| Participants                                            |                                 | 127             |                              | 281             |
| Observations                                            |                                 | 1524            |                              | 3372            |

\* $P < 0.05$ ; \*\* $P < 0.01$ ; SD: Standard Deviation estimates reflect preference heterogeneity in the participants; SE: Standard Error

**Appendix 10: Health-related quality of life by type of insurance**

Supplemental Table 7. Health-related quality of life for patients by type of insurance

| Type of insurance | EQ-5D-5L index value $\leq 0.8$ | EQ-5D-5L index value $> 0.8$ |
|-------------------|---------------------------------|------------------------------|
| URRBMI            | 90                              | 117                          |
| UEBMI             | 37                              | 164                          |
| Total             | 127                             | 281                          |

 $\chi^2 = 29.898$  P=0.000



## Appendix 11: Subgroup analysis according to gender

Supplemental Table 8. Subgroup analysis according to gender

| Attributes                                              | Male             |                 | Female           |                 |
|---------------------------------------------------------|------------------|-----------------|------------------|-----------------|
|                                                         | Mean (SE)        | SD (SE)         | Mean (SE)        | SD (SE)         |
| Expected gains in health outcomes from the treatment    |                  |                 |                  |                 |
| <i>Not as expected (reference)</i>                      |                  |                 |                  |                 |
| <i>As expected</i>                                      | 0.805** (0.174)  | 0.754* (0.357)  | 0.921** (0.200)  | 0.193(0.512)    |
| Increasing likelihood of effective treatment (per 10%)  | 0.476** (0.065)  | 0.409** (0.077) | 0.456** (0.069)  | 0.362** (0.089) |
| Severity of target disease                              |                  |                 |                  |                 |
| <i>Not severe (reference)</i>                           |                  |                 |                  |                 |
| <i>Severe</i>                                           | 0.303(0.177)     | 0.541(0.425)    | 0.346(0.191)     | 0.333(0.435)    |
| <i>Lethal</i>                                           | 0.249(0.199)     | 1.077** (0.282) | 0.182(0.241)     | 1.582** (0.319) |
| Incidence of serious adverse events                     |                  |                 |                  |                 |
| <i>Often (reference)</i>                                |                  |                 |                  |                 |
| <i>Occasionally</i>                                     | 0.680** (0.167)  | 0.471(0.371)    | 0.528** (0.187)  | 0.007(0.417)    |
| <i>Never or rarely</i>                                  | 0.953** (0.204)  | 0.768*(0.338)   | 0.897** (0.232)  | 1.146** (0.306) |
| Alternative technologies currently covered by insurance |                  |                 |                  |                 |
| <i>Yes (reference)</i>                                  |                  |                 |                  |                 |
| <i>No</i>                                               | 0.127(0.144)     | 0.288(0.650)    | 0.093(0.168)     | 0.202(0.643)    |
| Out-of-pocket costs (thousand CNY per month increase)   | -0.246** (0.084) | 0.893** (0.131) | -0.281** (0.098) | 0.979** (0.153) |
| Log likelihood                                          |                  | -780.85         |                  | -667.657        |
| Participants                                            |                  | 220             |                  | 188             |
| Observations                                            |                  | 2640            |                  | 2256            |

\*P<0.05; \*\*P<0.01; SD: Standard Deviation estimates reflect preference heterogeneity in the participants; SE: Standard Error

**STROBE 2007 (v4) checklist of items to be included in reports of observational studies in epidemiology\***  
**Checklist for cohort, case-control, and cross-sectional studies (combined)**

| Section/Topic             | Item # | Recommendation                                                                                                                                                                                                                                                                                                                                                                                                                                                         | Reported on page #                           |
|---------------------------|--------|------------------------------------------------------------------------------------------------------------------------------------------------------------------------------------------------------------------------------------------------------------------------------------------------------------------------------------------------------------------------------------------------------------------------------------------------------------------------|----------------------------------------------|
| Title and abstract        | 1      | (a) Indicate the study's design with a commonly used term in the title or the abstract                                                                                                                                                                                                                                                                                                                                                                                 | Page 2                                       |
|                           |        | (b) Provide in the abstract an informative and balanced summary of what was done and what was found                                                                                                                                                                                                                                                                                                                                                                    | Page 3-4                                     |
| <b>Introduction</b>       |        |                                                                                                                                                                                                                                                                                                                                                                                                                                                                        |                                              |
| Background/rationale      | 2      | Explain the scientific background and rationale for the investigation being reported                                                                                                                                                                                                                                                                                                                                                                                   | Page 6-8                                     |
| Objectives                | 3      | State specific objectives, including any pre-specified hypotheses                                                                                                                                                                                                                                                                                                                                                                                                      | Page 8 (line 47-54)                          |
| <b>Methods</b>            |        |                                                                                                                                                                                                                                                                                                                                                                                                                                                                        |                                              |
| Study design              | 4      | Present key elements of study design early in the paper                                                                                                                                                                                                                                                                                                                                                                                                                | Page 9 (line 11-20)                          |
| Setting                   | 5      | Describe the setting, locations, and relevant dates, including periods of recruitment, exposure, follow-up, and data collection                                                                                                                                                                                                                                                                                                                                        | Page 9-12                                    |
| Participants              | 6      | (a) <i>Cohort study</i> —Give the eligibility criteria, and the sources and methods of selection of participants. Describe methods of follow-up<br><i>Case-control study</i> —Give the eligibility criteria, and the sources and methods of case ascertainment and control selection. Give the rationale for the choice of cases and controls<br><i>Cross-sectional study</i> —Give the eligibility criteria, and the sources and methods of selection of participants | Page 12 (line 32-50)                         |
|                           |        | (b) <i>Cohort study</i> —For matched studies, give matching criteria and number of exposed and unexposed<br><i>Case-control study</i> —For matched studies, give matching criteria and the number of controls per case                                                                                                                                                                                                                                                 | Not applicable                               |
| Variables                 | 7      | Clearly define all outcomes, exposures, predictors, potential confounders, and effect modifiers. Give diagnostic criteria, if applicable                                                                                                                                                                                                                                                                                                                               | Page 10 (line 38-42);<br>Page 11 (line 5-21) |
| Data sources/ measurement | 8*     | For each variable of interest, give sources of data and details of methods of assessment (measurement). Describe comparability of assessment methods if there is more than one group                                                                                                                                                                                                                                                                                   | Page 13;<br>Page 14 (line 5-11)              |
| Bias                      | 9      | Describe any efforts to address potential sources of bias                                                                                                                                                                                                                                                                                                                                                                                                              | Page 13 (line 9-28)                          |
| Study size                | 10     | Explain how the study size was arrived at                                                                                                                                                                                                                                                                                                                                                                                                                              | Page 12 (line 51-58);<br>Page 13 (line 5-7)  |
| Quantitative variables    | 11     | Explain how quantitative variables were handled in the analyses. If applicable, describe which groupings were chosen and why                                                                                                                                                                                                                                                                                                                                           | Page 14 (line 37-54)                         |
| Statistical methods       | 12     | (a) Describe all statistical methods, including those used to control for confounding                                                                                                                                                                                                                                                                                                                                                                                  | Page 14 (line 18-35)                         |
|                           |        | (b) Describe any methods used to examine subgroups and interactions                                                                                                                                                                                                                                                                                                                                                                                                    | Page 14 (line 56-58)                         |
|                           |        | (c) Explain how missing data were addressed                                                                                                                                                                                                                                                                                                                                                                                                                            | Page 13 (line 16-24)                         |

|                   |     |                                                                                                                                                                                                                                                                                                           |                                                                   |
|-------------------|-----|-----------------------------------------------------------------------------------------------------------------------------------------------------------------------------------------------------------------------------------------------------------------------------------------------------------|-------------------------------------------------------------------|
|                   |     | (d) <i>Cohort study</i> —If applicable, explain how loss to follow-up was addressed<br><i>Case-control study</i> —If applicable, explain how matching of cases and controls was addressed<br><i>Cross-sectional study</i> —If applicable, describe analytical methods taking account of sampling strategy | Not applicable                                                    |
|                   |     | (e) Describe any sensitivity analyses                                                                                                                                                                                                                                                                     | Page 14 (line 56-58);<br>Page 15 (line 42-48)                     |
| <b>Results</b>    |     |                                                                                                                                                                                                                                                                                                           |                                                                   |
| Participants      | 13* | (a) Report numbers of individuals at each stage of study—eg numbers potentially eligible, examined for eligibility, confirmed eligible, included in the study, completing follow-up, and analysed                                                                                                         | Page 15 (line 20-30)                                              |
|                   |     | (b) Give reasons for non-participation at each stage                                                                                                                                                                                                                                                      | Not applicable                                                    |
|                   |     | (c) Consider use of a flow diagram                                                                                                                                                                                                                                                                        | Not applicable                                                    |
| Descriptive data  | 14* | (a) Give characteristics of study participants (eg demographic, clinical, social) and information on exposures and potential confounders                                                                                                                                                                  | Page 15 (line 32-52);<br>Page 16                                  |
|                   |     | (b) Indicate number of participants with missing data for each variable of interest                                                                                                                                                                                                                       | Not applicable                                                    |
|                   |     | (c) <i>Cohort study</i> —Summarise follow-up time (eg, average and total amount)                                                                                                                                                                                                                          | Not applicable                                                    |
| Outcome data      | 15* | <i>Cohort study</i> —Report numbers of outcome events or summary measures over time                                                                                                                                                                                                                       |                                                                   |
|                   |     | <i>Case-control study</i> —Report numbers in each exposure category, or summary measures of exposure                                                                                                                                                                                                      |                                                                   |
|                   |     | <i>Cross-sectional study</i> —Report numbers of outcome events or summary measures                                                                                                                                                                                                                        | Page 17 (line 17-38)                                              |
| Main results      | 16  | (a) Give unadjusted estimates and, if applicable, confounder-adjusted estimates and their precision (eg, 95% confidence interval). Make clear which confounders were adjusted for and why they were included                                                                                              | Page 15 (line 42-48);<br>Page 19 (line 52-59)                     |
|                   |     | (b) Report category boundaries when continuous variables were categorized                                                                                                                                                                                                                                 | Not applicable                                                    |
|                   |     | (c) If relevant, consider translating estimates of relative risk into absolute risk for a meaningful time period                                                                                                                                                                                          | Not applicable                                                    |
| Other analyses    | 17  | Report other analyses done—eg analyses of subgroups and interactions, and sensitivity analyses                                                                                                                                                                                                            | Page 17 (line 40-59);<br>Page 18; Page 19;<br>Page 20 (line 5-15) |
| <b>Discussion</b> |     |                                                                                                                                                                                                                                                                                                           |                                                                   |
| Key results       | 18  | Summarise key results with reference to study objectives                                                                                                                                                                                                                                                  | Page 20 (line 23-59);<br>Page 21 (line 5-7)                       |
| Limitations       | 19  | Discuss limitations of the study, taking into account sources of potential bias or imprecision. Discuss both direction and magnitude of any potential bias                                                                                                                                                | Page 24 (line 9-44)                                               |
| Interpretation    | 20  | Give a cautious overall interpretation of results considering objectives, limitations, multiplicity of analyses, results from similar studies, and other relevant evidence                                                                                                                                | Page 21 (line 43-58);<br>Page 22 (line 5-50)                      |
| Generalisability  | 21  | Discuss the generalisability (external validity) of the study results                                                                                                                                                                                                                                     | Page 22 (line 52-58);                                             |

1  
2  
3  
4  
5  
6  
7  
8  
9  
10  
11  
12  
13  
14  
15  
16  
17  
18  
19  
20  
21  
22  
23  
24  
25  
26  
27  
28  
29  
30  
31  
32  
33  
34  
35  
36  
37  
38  
39  
40  
41  
42  
43  
44  
45  
46

|                          |    |                                                                                                                                                               |                      |
|--------------------------|----|---------------------------------------------------------------------------------------------------------------------------------------------------------------|----------------------|
|                          |    |                                                                                                                                                               | Page 23 (line 5-46)  |
| <b>Other information</b> |    |                                                                                                                                                               |                      |
| Funding                  | 22 | Give the source of funding and the role of the funders for the present study and, if applicable, for the original study on which the present article is based | Page 25 (line 52-59) |

\*Give information separately for cases and controls in case-control studies and, if applicable, for exposed and unexposed groups in cohort and cross-sectional studies.

**Note:** An Explanation and Elaboration article discusses each checklist item and gives methodological background and published examples of transparent reporting. The STROBE checklist is best used in conjunction with this article (freely available on the Web sites of PLoS Medicine at <http://www.plosmedicine.org/>, Annals of Internal Medicine at <http://www.annals.org/>, and Epidemiology at <http://www.epidem.com/>). Information on the STROBE Initiative is available at [www.strobe-statement.org](http://www.strobe-statement.org).

For peer review only

# BMJ Open

## Patients' preferences for health insurance coverage of new technologies for treating chronic diseases in China: a discrete choice experiment

|                                 |                                                                                                                                                                                                                                                                                                                                                                                                                                                                                                                                                                                                                                                          |
|---------------------------------|----------------------------------------------------------------------------------------------------------------------------------------------------------------------------------------------------------------------------------------------------------------------------------------------------------------------------------------------------------------------------------------------------------------------------------------------------------------------------------------------------------------------------------------------------------------------------------------------------------------------------------------------------------|
| Journal:                        | <i>BMJ Open</i>                                                                                                                                                                                                                                                                                                                                                                                                                                                                                                                                                                                                                                          |
| Manuscript ID                   | bmjopen-2020-038051.R3                                                                                                                                                                                                                                                                                                                                                                                                                                                                                                                                                                                                                                   |
| Article Type:                   | Original research                                                                                                                                                                                                                                                                                                                                                                                                                                                                                                                                                                                                                                        |
| Date Submitted by the Author:   | 31-Aug-2020                                                                                                                                                                                                                                                                                                                                                                                                                                                                                                                                                                                                                                              |
| Complete List of Authors:       | Geng, JinSong; Nantong University Medical School, Department of Medical Informatics<br>Chen, Xiaowei; Nantong University Medical School, Department of Medical Informatics; Zhejiang University School of Medicine First Affiliated Hospital, Library and Reference Department<br>Bao, Haini; Nantong University Medical School, Department of Medical Informatics<br>Qian, Danmin; Nantong University Medical School, Department of Medical Informatics<br>Shao, Yuting; Tongji University School of Medicine, Department of Ophthalmology<br>Yu, Hao; Harvard Medical School, Department of Population Medicine; Harvard Pilgrim Health Care Institute |
| <b>Primary Subject Heading</b>: | Health policy                                                                                                                                                                                                                                                                                                                                                                                                                                                                                                                                                                                                                                            |
| Secondary Subject Heading:      | Health services research                                                                                                                                                                                                                                                                                                                                                                                                                                                                                                                                                                                                                                 |
| Keywords:                       | Health policy < HEALTH SERVICES ADMINISTRATION & MANAGEMENT, International health services < HEALTH SERVICES ADMINISTRATION & MANAGEMENT, Health & safety < HEALTH SERVICES ADMINISTRATION & MANAGEMENT                                                                                                                                                                                                                                                                                                                                                                                                                                                  |
|                                 |                                                                                                                                                                                                                                                                                                                                                                                                                                                                                                                                                                                                                                                          |

SCHOLARONE™  
Manuscripts



I, the Submitting Author has the right to grant and does grant on behalf of all authors of the Work (as defined in the below author licence), an exclusive licence and/or a non-exclusive licence for contributions from authors who are: i) UK Crown employees; ii) where BMJ has agreed a CC-BY licence shall apply, and/or iii) in accordance with the terms applicable for US Federal Government officers or employees acting as part of their official duties; on a worldwide, perpetual, irrevocable, royalty-free basis to BMJ Publishing Group Ltd ("BMJ") its licensees and where the relevant Journal is co-owned by BMJ to the co-owners of the Journal, to publish the Work in this journal and any other BMJ products and to exploit all rights, as set out in our [licence](#).

The Submitting Author accepts and understands that any supply made under these terms is made by BMJ to the Submitting Author unless you are acting as an employee on behalf of your employer or a postgraduate student of an affiliated institution which is paying any applicable article publishing charge ("APC") for Open Access articles. Where the Submitting Author wishes to make the Work available on an Open Access basis (and intends to pay the relevant APC), the terms of reuse of such Open Access shall be governed by a Creative Commons licence – details of these licences and which [Creative Commons](#) licence will apply to this Work are set out in our licence referred to above.

Other than as permitted in any relevant BMJ Author's Self Archiving Policies, I confirm this Work has not been accepted for publication elsewhere, is not being considered for publication elsewhere and does not duplicate material already published. I confirm all authors consent to publication of this Work and authorise the granting of this licence.

# Patients' preferences for health insurance coverage of new technologies for treating chronic diseases in China: a discrete choice experiment

Jinsong Geng<sup>1\*</sup>, Xiaowei Chen<sup>1,2</sup>, Haini Bao<sup>1</sup>, Danmin Qian<sup>1</sup>, Yuting Shao<sup>3</sup>, Hao Yu<sup>4</sup>

<sup>1</sup>Department of Medical Informatics, Nantong University Medical School, Nantong, China

<sup>2</sup>Library and Reference Department, First Affiliated Hospital of Zhejiang University School of Medicine, Hangzhou, China

<sup>3</sup>Department of Ophthalmology, Tongji University School of Medicine, Shanghai, China

<sup>4</sup>Department of Population Medicine, Harvard Medical School and Harvard Pilgrim Health Care Institute, Boston, USA

\*Correspondence: Jinsong Geng, Department of Medical Informatics, Nantong University Medical School, 19 Qixiu Road, Nantong 226001, China; Email [gjs@ntu.edu.cn](mailto:gjs@ntu.edu.cn); Tel: +86 513 85051891; Fax: +86 513 85051876

Word count: 4992

## ABSTRACT

### Objectives

Our study aimed to inform insurance decision-making in China by investigating patients' preferences for insurance coverage of new technologies for treating chronic diseases.

### Design

We identified six attributes of new medical technologies for treating chronic diseases and used Bayesian-efficient design to generate choice sets for a discrete choice experiment (DCE). After conducting the DCE, we analyzed the data by mixed logit regression to examine patient-reported preferences for each attribute.

### Setting

The DCE was conducted with patients in six tertiary hospitals from four cities in Jiangsu Province.

### Participants

Patients aged 18 years or older with a history of diabetes or hypertension and taking medications regularly for more than one year were recruited (N=408).

### Results

The technology attributes regarding expected gains in health outcomes from the treatment, high likelihood of effective treatment, and low incidence of serious adverse events were significant, positive predictors of choice by the study patients ( $P < 0.01$ ). The out-of-pocket cost was a significant, negative attribute for the entire study sample ( $\beta = -0.258$ ,  $P < 0.01$ ) and for the patients with Urban-Rural Residents Basic Medical Insurance (URRBMI) ( $\beta = -0.511$ ,  $P < 0.01$ ), but not for all the patients with Urban Employees Basic Medical Insurance (UEBMI) ( $\beta = -0.071$ ,  $P > 0.05$ ). The severity of target disease was valued by patients with lower EQ-5D-5L index value as well as URRBMI enrollees.

### Conclusions

Patients highly valued the health benefits and risks of new technologies, which were



1  
2  
3  
4  
5 closely linked to their feelings of disease and perceptions of health-related quality of  
6  
7 life. However, there existed heterogeneity in preferences between URRBMI and  
8  
9 UEBMI patients. Further efforts should be made to reduce the gap between insurance  
10  
11 schemes and make safe and cost-effective new technologies as a priority for health  
12  
13 insurance reimbursement.  
14  
15

16 **Keywords:** discrete choice experiment, patient preferences, chronic diseases, health  
17  
18 insurance  
19  
20  
21  
22  
23  
24  
25  
26  
27  
28  
29  
30  
31  
32  
33  
34  
35  
36  
37  
38  
39  
40  
41  
42  
43  
44  
45  
46  
47  
48  
49  
50  
51  
52  
53  
54  
55  
56  
57  
58  
59  
60

## Strengths and limitations of this study

- Our study provides evidence regarding patients' preferences for insurance coverage of new technologies for treating chronic diseases and will be helpful for applying a patient-centered approach to policy-making.
- The discrete choice experiment is a rigorous method that enables us to identify differential preferences among chronic disease patients by types of social health insurance and by the level of health-related quality of life in China.
- The bayesian-efficient design was used to improve the statistical efficiency of the choice design, and a blocking technique was used to increase the response efficiency of patients.
- Since our sample was from a wealthy province in China, future studies of nationally representative samples are needed.
- While this study focused on hypertension and diabetes, two of the most prevalent chronic diseases, future studies need to examine other types of chronic diseases.

## INTRODUCTION

Non-communicable chronic diseases (chronic diseases) are health conditions or diseases with long-term accumulation, non-self-healing, and difficult to cure. Nowadays, the prevalence and mortality of chronic diseases are on the rise around the world.<sup>1</sup> Chronic diseases present a particularly daunting challenge to China. It was estimated that among Chinese adults aged 35 to 75 years, nearly half had hypertension.<sup>2</sup> The overall prevalence of diabetes in Chinese adults was about 10.9%.<sup>3</sup> Furthermore, comorbidities are highly prevalent among patients with chronic diseases, which harm the patient's quality of life and impede the efficacy of treatment.<sup>4-6</sup> Chronic diseases lead to a heavy financial burden on patients' families and health insurance programs. It was estimated that the total economic burden associated with chronic diseases in China over the period 2010-2030 could be as high as US\$16 trillion (measured in 2010 US Dollars).<sup>7</sup> Further adding to the challenges to China's health insurance programs' financing capacity, new technologies for treating chronic diseases continue to enter the market, which can be very expensive and contribute to rising healthcare costs. Deciding on which new technology to cover and by which insurance program has become a key issue facing policy-makers in China in the context of universal health insurance coverage.

As part of its goal of providing timely, acceptable, and affordable basic healthcare of appropriate quality to its residents, China successfully achieved universal health insurance coverage in 2011, increasing demand for and expenditures on healthcare. China's total health expenditures grew at an average annual rate of 12.2% from 2008 to 2017, which was much higher than its GDP's average annual growth rate (8.1%).<sup>8</sup> In recent years, Chinese policy-makers have struggled to keep a balance between expenditure control and meeting patients' demand for healthcare, including the demand for new technologies by patients with chronic diseases. China's National Healthcare Security Administration is promoting the health insurance payment based on diagnosis-related groups (DRGs), a patient classification for standardizing payment in

1  
2  
3  
4  
5 the national health insurance schemes. Consequently, medical fees and insurance  
6 payments will be determined in accordance with the DRG classification, which includes  
7 chronic diseases such as diabetes and hypertension.<sup>9</sup>  
8  
9

10 After China had reached universal health insurance coverage, there were still  
11 considerable disparities in benefit coverage and reimbursement ratio among the three  
12 major public insurance programs that together covered more than 95% of Chinese  
13 people, including New Rural Cooperative Medical Scheme (NRCMS), Urban Residents  
14 Basic Medical Insurance (URBMI), and Urban Employees Basic Medical Insurance  
15 (UEBMI). For further details on differences in health insurance eligibility, premiums,  
16 and benefits among the three programs, see Yu 2015.<sup>10</sup> Generally speaking, UEBMI has  
17 the best benefits package and the lowest out-of-pocket cost among the three public  
18 insurance programs,<sup>11 12</sup> and UEBMI enrollees had a higher likelihood of healthcare  
19 utilization.<sup>13</sup> To improve administrative efficiency and reduce inequality in insurance  
20 benefits, the China State Council issued a policy in January 2016 merging the NRCMS  
21 and URBMI to form the Urban-Rural Residents Basic Medical Insurance (URRBMI).<sup>14</sup>  
22 While the newly formed URRBMI helped equalize insurance benefits between urban  
23 and rural residents, gaps remained between URRBMI and UEBMI. For example,  
24 according to the 2018 statistical bulletin issued by China's National Healthcare Security  
25 Administration, the average per capita inpatient hospitalization cost was 11,181 CNY  
26 (about US\$1704) for UEBMI enrollees and 6577 CNY (about US\$1003) for URRBMI  
27 enrollees.<sup>15</sup> The average inpatient reimbursement ratio for UEBMI enrollees was 71.8%,  
28 and the reimbursement ratio for URRBMI enrollees was 56.1%.<sup>15</sup> Even among the  
29 UEBMI enrollees, the insurance benefit is not comparable, as some of the enrollees  
30 enjoy civil servant subsidies.<sup>16</sup> For example, if the medical expenditure exceeds the  
31 ceiling of health insurance reimbursement, outpatients and inpatients that enjoy civil  
32 servant subsidies may still be subsidized by 70% and 80% respectively for the  
33 exceeding parts.<sup>17</sup> Whereas disparities in China's insurance programs and patients'  
34 utilization of healthcare have been well-documented in the literature, no studies have  
35  
36  
37  
38  
39  
40  
41  
42  
43  
44  
45  
46  
47  
48  
49  
50  
51  
52  
53  
54  
55  
56  
57  
58  
59  
60

1  
2  
3  
4  
5 yet examined whether patients' preferences for new medical technology vary by type of  
6 insurance. This study aimed to fill the gap.

8  
9 Patient-reported outcome measures, such as health-related quality of life (HRQoL),  
10 are useful for understanding the impact of the disease on their functional status and  
11 well-being.<sup>18</sup> EQ-5D series are among the most widely used multi-attribute utility  
12 instruments to measure HRQoL. EQ-5D-5L uses a health-state classification system that  
13 defines health in 5 areas,<sup>19</sup> has been proved to have the validity and discriminatory  
14 power to measure HRQoL in patients with chronic diseases.<sup>20-22</sup> Although HRQoL is an  
15 essential measure of health status to inform public health and health policy, whether  
16 patients' preferences on reimbursement differ from HRQoL remains unclear.

17  
18  
19  
20  
21  
22  
23  
24 Eliciting patients' preferences and involving patients in health insurance  
25 decision-making can be helpful to increase the satisfaction of patients and is an integral  
26 part of patient-centered care. This is defined as providing care that is respectful of, and  
27 responsive to individual patient's preferences, needs, and values.<sup>23</sup> Although the  
28 patient-centered approach and value-based care have long been advocated in China,  
29 there still a lack of evidence from patients reflecting their preferences to inform health  
30 insurance coverage decision-making. This study adds new information to the literature  
31 by conducting a discrete choice experiment (DCE), which is an attribute-based method  
32 to measure the preferences and trade-offs of respondents and becomes a recognized  
33 scientific approach to elicit preferences.<sup>24</sup> Prior research showed that DCE was fruitful  
34 and reliable to improve healthcare decision-making effectively.<sup>25</sup> Our DCE focused on  
35 chronic disease patients, and its goal was to support evidence-informed insurance  
36 policy-making in China. Specifically, we used the DCE data to test the following  
37 hypotheses: (1) new technology attributes regarding health benefits are more important  
38 than other attributes for health insurance coverage; (2) patients' preferences differ by  
39 type of disease and type of insurance.

40  
41  
42  
43  
44  
45  
46  
47  
48  
49  
50  
51  
52  
53  
54  
55  
56  
57  
58  
59  
60

## METHODS

### Identification of technology attributes and levels

Our DCE design, implementation, and analysis followed the user guide developed jointly by the World Bank, World Health Organization, and U.S. Agency for International Development.<sup>26</sup> We used a three-step approach to complete the preliminary stage of DCE, which aimed to identify and define the attributes and levels of new medical technologies. First, a systematic review was conducted to select attributes that were often used in multi-criteria decision analyses of health insurance decision-making. The systematic review was performed according to the framework for evidence-based decision-making as defined by EVIDEM.<sup>27</sup> We found that the most commonly mentioned dimensions were comparative outcomes (effectiveness, safety/tolerability), economic consequences (costs and cost-effectiveness) and needs of new technologies (severity of target disease, size of the affected population, unmet needs related to the already reimbursed technologies), and knowledge of new technologies (quality of evidence, expert consensus/clinical practice guideline).<sup>28</sup>

Second, both focus group discussions with physicians and expert consultation were carried out to determine the attributes used in our research. There was no consensus among physicians about the criteria to determine the level of attributes of new technologies to treat diabetes and hypertension in our evidence-based clinical practice workshop. Then, we did focus group discussion and expert consultation on attributes and levels regarding reimbursement of new medical technologies. 14 experts (from 6 provinces in China) in reimbursement, health economics, healthcare service, and evidence-based medicine were consulted. Criteria regarding needs of the technology (severity, benefit type of technology, unmet needs of reimbursed technology), comparative outcomes (effectiveness, safety/tolerability, patient-perceived/patient-reported outcomes), and economic aspects of the technology (costs and cost-effectiveness) were required for health insurance reimbursement

1  
2  
3  
4  
5 decisions.<sup>29</sup> To better define the levels of attributes, we searched the famous health  
6  
7 technology assessment database established by Canadian Agency for Drugs and  
8  
9 Technologies in Health (CADTH) to select potential new technologies and find reasons  
10  
11 for the recommendation of reimbursement. We found 68 reports regarding hypertension  
12  
13 and diabetes which were published before March 2018. Data extraction form was  
14  
15 developed and the attributes of new technologies were extracted. We further searched  
16  
17 the database founded by China National Medical Products Administration (NMPA,  
18  
19 formerly China Food and Drug Administration or CFDA) according to the generic name  
20  
21 of new technologies to see if they were licensed and available in China. We also  
22  
23 referred to the list of medical technologies already covered by the public health  
24  
25 insurance programs in Jiangsu province. After completing the database search, we  
26  
27 defined new medical technologies in this study as the therapeutics for hypertension and  
28  
29 diabetes, which had been marketed in China but were not covered by the public health  
30  
31 insurance programs in Jiangsu in 2018. We determined the range of out-of-pocket costs  
32  
33 according to the retail price of new technologies.

34  
35 Attributes and levels of new medical technologies that were used in our research  
36  
37 were listed in Table 1. Details of the explanation of attributes and levels were shown in  
38  
39 Appendix 1. Our purpose was to identify the specific technology attributes and levels  
40  
41 that were preferred by patients, not the special technology used to treat a specific  
42  
43 disease. Therefore, the scenarios in our DCE were not restricted to a particular type of  
44  
45 disease.  
46  
47  
48  
49  
50  
51  
52  
53  
54  
55  
56  
57  
58  
59  
60

**Table 1. Attributes and levels of new medical technology in the DCE**

| Attributes                                              | Levels                                  | Variables coding |
|---------------------------------------------------------|-----------------------------------------|------------------|
| Expected gains in health outcomes from the treatment    | Not as expected; As expected            | Binary           |
| Likelihood of effective treatment                       | 30%-90%                                 | Continuous       |
| Severity of target disease                              | Not severe; Severe but not fatal; Fatal | Categorical      |
| Incidence of serious adverse events                     | Often; Occasionally; Never or rarely    | Categorical      |
| Alternative technologies currently covered by insurance | Yes; No                                 | Binary           |
| Out-of-pocket cost per month (if not reimbursed)        | CNY 300-3500                            | Continuous       |

Note: We defined new medical technologies according to research objectives. New medical technologies referred to new technologies that entered into the market recently before our study but were not included in the reimbursement lists of social health insurance schemes, such as URRBMI and UEBMI.

The average exchange rate of US Dollars to Chinese Yuan (CNY) in 2018 was about 6.56. Therefore, CNY 300 was approximately US\$46; CNY 3500 was about US\$533.

## Experimental design and development of the questionnaire

D-efficiency experimental design that maximized the precision of estimated choice-model parameters for a given number of choice questions<sup>30</sup> was created by Ngene 1.1.2 software (Choice-Metrics, Sydney, Australia). Prior coefficients were set to zero during the pilot. After obtaining priors of the attributes from the pilot, Bayesian-efficient design was used to generate the final choice sets, which consisted of 30 pairs of scenarios and were divided into five blocks, with six pairs in each block. Blocking design promoted response efficiency by reducing the potential cognitive burden on respondents.<sup>31</sup>

We chose unlabeled over labeled DCE. Unlabeled DCE was widely used to investigate patients' preferences for treatment techniques.<sup>32-34</sup> Respondents of unlabeled DCEs found that they were not subject to the psychological cues of the technology labels, thus reflecting the real-world choice situation.<sup>35</sup> Also, in our research, new medical technologies to treat chronic diseases continue to emerge. Therefore, the unlabeled DCE was considered appropriate for our study. The forced-choice sets were used in our DCE because when no option had a definitive advantage, it was assumed that forced-choice under preference uncertainty would favor options that were easier to



1  
2  
3  
4  
5 justify and associated with a lower likelihood of error and regret, such as compromise  
6 and asymmetrically dominant options.<sup>36</sup>  
7

8  
9 Examples of scenarios were shown in Appendix 2. Our final questionnaire  
10 contained two sections. Section A listed questions regarding participants'  
11 socio-demographic characteristics, past medical history, reasons for the hospital visit,  
12 and health insurance information, dimensions and levels of EQ-5D-5L. EQ-5D-5L used  
13 a health-state classification system defining health in 5 dimensions, mobility, self-care,  
14 usual activities, pain/discomfort and anxiety/depression. Each of the 5 dimensions was  
15 divided into five levels of perceived problems, no problem, mild problems, moderate  
16 problems, severe problems, and unable to/extreme problems. Section B was the DCE  
17 task.  
18  
19  
20  
21  
22  
23  
24  
25

## 26 27 **DCE implementation and data collection** 28 29

30 Our DCE was carried out from September 15<sup>th</sup> to October 15<sup>th</sup>, 2018, in six tertiary  
31 public hospitals in four cities in Jiangsu Province. Since our DCE aimed to inform  
32 decision-making on patient-centered care by identifying patients' preferences, the study  
33 sample consisted of patients with chronic diseases, not the general population. Due to  
34 the high prevalence, serious complications, and the heavy burden of hypertension and  
35 diabetes, we selected patients with these diseases. Inclusion criteria were patients aged  
36 18 years or older, participating in a social health insurance program, with a history of  
37 diabetes or hypertension, and taking medications regularly for more than one year.  
38 Patients were enrolled consecutively during the study period.  
39  
40  
41  
42  
43  
44  
45  
46

47 There was no general standard on the ideal sample size required for a DCE.<sup>37</sup>  
48 Generally speaking, a less efficient design may also require a larger sample size,  
49 resulting in increased costs.<sup>38</sup> Estimates of the sample size were usually determined  
50 based on previous research, rules of thumb, and budget constraints. DCE studies  
51 showed that reliable models could be estimated in samples with more than 50  
52 participants.<sup>39 40</sup>  
53  
54  
55  
56  
57  
58  
59  
60

1  
2  
3  
4  
5 The DCE questionnaires were administered through one-to-one, face-to-face  
6 interviews to ensure the validity and quality of the investigation. Our interviewers  
7 consisted of 13 medical students, all of whom were interns during the research period.  
8  
9 For quality assurance, the interviewers were trained before the experiment. We  
10 compiled a survey training manual and asked each interviewer to give explanations to  
11 the scenarios. The interviewers were required to check whether the entire questionnaire  
12 was complete immediately after each interview. If any information was missing, they  
13 had to go back and asked patients to provide the information on site. For patients with  
14 blurred vision or illiteracy, the interviewers explained the meaning of the questionnaire  
15 item by item until the patients fully understood each item.  
16  
17  
18  
19  
20  
21  
22  
23

24 Verbal informed consent was obtained from all patients before both the pilot and  
25 the final survey. Patients were made aware that participation in the survey was  
26 voluntary. All data and information collected from patients was anonymous. During the  
27 pilot and formal survey, patients had to make a decision based on the assumption that  
28 only one technology could be covered due to limited health insurance funds. They were  
29 asked to think carefully and make a trade-off between two new medical technologies.  
30 The duration of the survey ranged from 20 minutes to one hour. We prepared a packed  
31 cotton towel for each patient as a gift (CNY 10, or US\$1.4). Patients were asked about  
32 how confident they felt in completing the choice sets. The confidence score ranged from  
33 0 (not confident at all) to 10 (extremely confident) (Appendix 3). We excluded the DCE  
34 questionnaires with a confidence score of less than 8.  
35  
36  
37  
38  
39  
40  
41  
42  
43  
44  
45  
46

## 47 **Patient and public involvement**

48  
49 Ninety patients with diabetes or hypertension were engaged in the pilot survey to  
50 provide feedback on intelligibility, acceptability, and reliability of the questionnaire.  
51 Response from the patients led to a more explicit and apprehensible description of the  
52 survey questions. The patients participating in the pilot were not included in the final  
53 survey. No patients were involved in the recruitment of study participants or the  
54  
55  
56  
57  
58  
59  
60

1  
2  
3  
4  
5 conduct of the study.  
6  
7  
8

## 9 **Data analysis**

10  
11  
12 Our empirical analysis of the DCE data was based on the random utility model.  
13  
14 Like previous research,<sup>26</sup> we considered the utility,  $U$ , that patient,  $i$ , assigned to choice,  
15  
16  $j$ , from  $J$  alternative choices, as the sum of two parts: observable component and  
17  
18 unobservable component. The equation was developed as follows:  
19

$$20 \quad U_{ij} = V_{ij} + \varepsilon_{ij} = \beta_0 + \beta_1 x_{1ij} + \beta_2 x_{2ij} + \dots + \beta_m x_{mij} + \varepsilon_{ij}$$

21  
22 where  $V_{ij}$  was the observable component determined by patients' preferences for  
23  
24 attributes  $(x_1, \dots, x_m)$ ,  $\varepsilon_{ij}$  was the unobservable component of unobserved attributes and  
25  
26 individual-level variations, and  $\beta$  quantified the strength of preference for each attribute  
27  
28 level.<sup>26</sup>  
29

30  
31 We implemented the above equation by estimating mixed logit regression using  
32  
33 STATA 14.2 SE (StataCorp LLC, College Station, Texas, USA) and was specified with  
34  
35 500 Halton draws. The mixed logit model allows for unknown heterogeneity in  
36  
37 individual preferences and estimates both the mean preference weight and the standard  
38  
39 deviation. We assumed that all variables of the attributes, except for the constant, had a  
40  
41 random component and that the weights of preference were normally distributed. The  
42  
43 choice of patients was the dependent variable, and the selected technology attributes  
44  
45 were independent variables. Dummy coding was used for categorical variables of our  
46  
47 DCE data. For dummy variable coding, each model-estimated coefficient is a measure  
48  
49 of the preference strength of that level relative to the omitted level of a specific  
50  
51 attribute.<sup>41 42</sup> Subgroup analysis was performed by type of disease, type of insurance,  
52  
53 HRQoL, and gender. In each regression model, the attribute level with a negative  
54  
55 coefficient indicates that patients would prefer not to move from the reference level to  
56  
57 that level, while an attribute level with a positive coefficient indicates that patients  
58  
59 would prefer to move from the reference level to that level.<sup>39</sup>  
60

## RESULTS

### Characteristics of patients

A total of 410 patients were consented to participate in the DCE survey, and data from 408 patients were available for analysis with two patients excluded from the analysis due to non-compliance with the inclusion criteria, incomplete data, and lack of confidence. The mean score for confidence was 8.80 (95%CI 8.69-8.90), which suggested patients were confident in their choice. For details about numbers of patients in each sampled hospital, see Appendix 4.

Table 2 presented the demographic and clinical characteristics of the included patients. The sample had more males than females (53.92% vs. 46.08%). The mean age of the patients was 62.34 years (ranging from 28 to 96 years). They were almost evenly split between UEBMI and URRBMI (49.26% vs. 50.74%). Most of the patients had hypertension (63.97%) and 21.81% had diabetes, while 14.22% had both hypertension and diabetes. There was no statistically significant difference between hypertension and diabetes patients in terms of insurance types (UEBMI vs URRBMI,  $P=0.392$ ) and benefits (UEBMI with extra benefit vs UEBMI without extra benefit,  $P=0.359$ ) (Appendix 5). Cardiovascular disease (98 patients) was the most common comorbidity among 180 patients with chronic comorbid conditions other than hypertension and diabetes (Appendix 6).

**Table 2. Characteristics of patients (n=408)**

| Characteristics                                          | n (%)       |
|----------------------------------------------------------|-------------|
| <b>Gender</b>                                            |             |
| Male                                                     | 220 (53.92) |
| Female                                                   | 188 (46.08) |
| <b>Age groups</b>                                        |             |
| 18~45                                                    | 30 (7.35)   |
| 45~59                                                    | 131 (32.11) |
| 60~74                                                    | 184 (45.10) |
| ≥75                                                      | 63 (15.44)  |
| <b>Urban vs. rural household registration</b>            |             |
| Urban                                                    | 210 (51.47) |
| Rural                                                    | 198 (48.53) |
| <b>Education</b>                                         |             |
| Unschooling                                              | 39 (9.56)   |
| Primary school                                           | 108 (26.47) |
| Junior high school                                       | 110 (26.96) |
| High school                                              | 89 (21.81)  |
| Junior college or higher vocational college              | 31 (7.60)   |
| Bachelor's degree or above                               | 31 (7.60)   |
| <b>Employment</b>                                        |             |
| Farmer                                                   | 105 (25.74) |
| Urban employee                                           | 140 (34.31) |
| Retiree                                                  | 112 (27.45) |
| Freelancers                                              | 32 (7.84)   |
| Unemployed                                               | 19 (4.66)   |
| <b>Type of insurance<sup>#</sup></b>                     |             |
| UEBMI                                                    | 201 (49.26) |
| URRBMI                                                   | 207 (50.74) |
| <b>Family monthly income (CNY)<sup>Δ</sup></b>           |             |
| < 2000                                                   | 83 (20.34)  |
| 2001~4000                                                | 81 (19.85)  |
| 4001~6000                                                | 93 (22.79)  |
| 6001~8000                                                | 69 (16.91)  |
| 8001~10000                                               | 41 (10.05)  |
| >10000                                                   | 41 (10.05)  |
| <b>Type of patients</b>                                  |             |
| Outpatients                                              | 83 (20.34)  |
| Inpatients                                               | 325 (79.66) |
| <b>Type of chronic diseases</b>                          |             |
| Hypertension                                             | 261 (63.97) |
| Diabetes                                                 | 89 (21.81)  |
| Both                                                     | 58 (14.22)  |
| <b>Comorbidities other than hypertension or diabetes</b> |             |
| Yes                                                      | 180 (44.12) |
| No                                                       | 228 (55.88) |
| <b>EQ-5D-5L index value<sup>*</sup></b>                  |             |
| ≤0.8                                                     | 127         |
| >0.8                                                     | 281         |

<sup>#</sup>1 UEBMI patients and 6 URRBMI patients also enrolled in commercial health insurance.

1  
2  
3  
4  
5  
6  
7  
8  
9  
10  
11  
12  
13  
14  
15  
16  
17  
18  
19  
20  
21  
22  
23  
24  
25  
26  
27  
28  
29  
30  
31  
32  
33  
34  
35  
36  
37  
38  
39  
40  
41  
42  
43  
44  
45  
46  
47  
48  
49  
50  
51  
52  
53  
54  
55  
56  
57  
58  
59  
60

^ The average exchange rate between US Dollars and Chinese Yuan (CNY) in 2018 was 6.56.

\*The utility index was derived from the Chinese value sets.<sup>43</sup> Currently, the well-accepted threshold of the EQ-5D-5L index value still lacks. However, in most cases, the EQ-5D-5L index value for patients with serious complications of diabetes and hypertension was equal to or less than 0.8, as shown in studies conducted in China.<sup>20 22</sup> EQ-5D-5L index value $\leq$ 0.8 group: Median 0.6718, IQR -0.0818~0.7998; EQ-5D-5L index value $>$ 0.8 group: Median 0.9507, IQR 0.8410~1.

## Regression analysis of the DCE data

Our analysis found that the study patients highly valued the new technologies with never or rare incidence of serious adverse events ( $\beta = 0.884$ ,  $P < 0.01$ ), followed by the expected gains in health outcomes from the treatment ( $\beta = 0.809$ ,  $P < 0.01$ ) (Table 3). The likelihood of effective treatment was also a significant, positive predictor of patients' choice of new technologies ( $\beta = 0.455$ ,  $P < 0.01$ ) while out-of-pocket cost was a significant, negative predictor of patients' choice ( $\beta = -0.258$ ,  $P < 0.01$ ). In contrast, whether there were alternative technologies currently covered by insurance did not seem to be an important consideration for the patients ( $P > 0.05$ ). Unobservable preference heterogeneity as indicated by the estimated standard deviation (SD) of the mean coefficients, were identified for four variables—expected gains in health outcomes from the treatment, the likelihood of effective treatment, out-of-pocket cost, and fatal disease.

## Subgroup analysis by type of disease

Appendix 7 presented the results from the subgroup analysis by type of disease (hypertension versus diabetes). While the two groups had similar results, there were two notable differences. One was that, although out-of-pocket cost remained a significant negative predictor, the coefficient for hypertension patients was -0.178 ( $P < 0.05$ ), not as important as for patients with diabetes ( $\beta = -0.395$ ,  $P < 0.01$ ). The other was that the expected gains in health outcomes from the treatment seemed to be more important for diabetes patients ( $\beta = 0.965$ ,  $P < 0.01$ ) when compared with those who only had hypertension ( $\beta = 0.716$ ,  $P < 0.01$ ). The SD revealed coefficient heterogeneity in both subgroups for the random parameters of three variables—the likelihood of effective treatment, fatal disease, and out-of-pocket cost.

**Table 3. DCE results from mixed logit model**

| Attributes                                              | All patients    |                |
|---------------------------------------------------------|-----------------|----------------|
|                                                         | Mean(SE)        | SD(SE)         |
| Expected gains in health outcomes from the treatment    |                 |                |
| <i>Not as expected (reference)</i>                      |                 |                |
| <i>As expected</i>                                      | 0.809**(0.123)  | 0.554* (0.275) |
| Likelihood of effective treatment (per 10% increase)    | 0.455**(0.044)  | 0.375**(0.055) |
| Severity of target disease                              |                 |                |
| <i>Not severe (reference)</i>                           |                 |                |
| <i>Severe</i>                                           | 0.291*(0.123)   | 0.316(0.431)   |
| <i>Fatal</i>                                            | 0.208(0.147)    | 1.264**(0.199) |
| Incidence of serious adverse events                     |                 |                |
| <i>Often (reference)</i>                                |                 |                |
| <i>Occasionally</i>                                     | 0.575**(0.116)  | 0.035(0.694)   |
| <i>Never or rarely</i>                                  | 0.884**(0.142)  | 0.900(0.206)   |
| Alternative technologies currently covered by insurance |                 |                |
| <i>Yes (reference)</i>                                  |                 |                |
| <i>No</i>                                               | 0.087(0.104)    | 0.095(0.501)   |
| Out-of-pocket cost (thousand CNY per month increase)    | -0.258**(0.061) | 0.898**(0.090) |
| Log likelihood                                          |                 | -1485.761      |
| Participants                                            |                 | 408            |
| Observations                                            |                 | 4896           |

\*P<0.05; \*\*P<0.01; SD: Standard Deviation estimates reflect preference heterogeneity in the participants; SE: Standard Error

### Subgroup analysis by type of insurance

Appendix 8 summarized the subgroup analyses by type of insurance. The expected gains in health outcomes from the treatment, likelihood of effective treatment, and low incidence of serious adverse events were significant, positive predictors of technology choice (P<0.01) for both URRBMI and UEBMI patients. Whether there were alternative technologies currently covered by insurance was statically insignificant for both groups (P>0.05). However, these two groups differed remarkably in two technology attributes. The coefficient of out-of-pocket cost was significant for URRBMI patients ( $\beta = -0.511$ , P<0.01), but not for UEBMI patients ( $\beta = -0.071$ , P>0.05). The severity of target disease also had significant coefficients for URRBMI patients (P<0.01), but not for UEBMI patients.

1  
2  
3  
4  
5 We conducted further analysis of the UEBMI patients by excluding those UEBMI  
6 patients who enjoyed extra health insurance benefits. As indicated by Column (3), we  
7 found that out-of-pocket cost was a meaningful attribute for the remaining UEBMI  
8 patients ( $\beta = -0.211$ ,  $P < 0.05$ ) although not as important as shown in URRBMI patients  
9 ( $\beta = -0.211$  vs.  $\beta = -0.511$ ). On the other hand, the severity of target disease remained  
10 statistically non-significant after excluding those UEBMI patients with extra insurance  
11 benefits. Preference heterogeneity was identified for the lowest incidence of serious  
12 adverse events.  
13  
14  
15  
16  
17  
18  
19  
20  
21  
22

### 23 **Subgroup analysis by HRQoL**

24  
25 Appendix 9 demonstrated the results from the subgroup analysis by EQ-5D-5L  
26 index value, which was a valid measurement for HRQoL. The severity of target disease,  
27 both severe and fatal, was important for patients with an EQ-5D-5L index value less  
28 than or equal to 0.8 ( $P < 0.01$ ). However, it was statistically non-significant for patients  
29 with an EQ-5D-5L index value higher than 0.8 ( $P > 0.05$ ). Although patients' preferences  
30 for attributes including expected gains in health outcomes from the treatment, and low  
31 incidence of serious adverse events were statistically significant for both groups, they  
32 were less important as viewed by the group with the lower EQ-5D-5L index value. In  
33 patients with an EQ-5D-5L index value less than or equal to 0.8, expected gains in  
34 health outcomes from the treatment had more variations than other attributes. However,  
35 the heterogeneity for the fatal disease was most significant in patients with an  
36 EQ-5D-5L index value greater than 0.8.  
37  
38  
39  
40  
41  
42  
43  
44  
45  
46  
47

48 Since the severity of target disease was an important attribute for URRBMI patients  
49 ( $P < 0.01$ ), but not for UEBMI patients. We did the chi-square test and results showed  
50 that the proportion of patients with a lower EQ-5D-5L index value was significantly  
51 higher in the URRBMI group ( $P < 0.01$ ) (Appendix 10).  
52  
53  
54  
55

### 56 **Subgroup analysis by gender**

57 We found that patients in both groups valued the new technologies with expected  
58  
59  
60



1  
2  
3  
4 gains in health outcomes from the treatment, the likelihood of effective treatment, low  
5 incidence of serious adverse events, and low out-of-pocket cost ( $P<0.01$ ) (Appendix  
6  
7 11). However, the differences in preferences for attributes were not obvious between  
8  
9 males and females.  
10  
11  
12  
13  
14

## 15 **DISCUSSION**

### 16 **Summary of the findings**

17  
18  
19  
20  
21 Our study found that key technology attributes, including expected gains in health  
22 outcomes from the treatment, high likelihood of effective treatment, and low incidence  
23 of serious adverse events were significant, positive predictors of patient choice for  
24 health insurance coverage. These results stand for the entire study sample and the  
25 subgroup analyses.  
26  
27  
28  
29

30 The out-of-pocket cost was a significant, negative predictor for the entire sample,  
31 showing that patients' preferences decreased as the out-of-pocket cost increased. We  
32 also found that out-of-pocket cost was a significant, negative predictor for both  
33 hypertension patients and diabetes patients, although it was less important for the  
34 former group than for the latter.  
35  
36  
37  
38  
39

40 When it came to different insurance types, we identified preference heterogeneity  
41 as suggested by previous DCE studies.<sup>44</sup> Specifically, we found that out-of-pocket cost  
42 was a significant, negative predictor for URRBMI patients' preference for insurance  
43 coverage, while the severity of target disease was a significant, positive predictor for  
44 this group of patients. But none of these attributes was a significant predictor for  
45 UEBMI patients. Our further analysis of the UEBMI patients by excluding those  
46 UEBMI patients who enjoyed extra health insurance benefits revealed that the  
47 remaining UEBMI patients regarded out-of-pocket cost as a significant, negative  
48 attribute for coverage, while the severity of target disease remained statistically  
49 non-significant.  
50  
51  
52  
53  
54  
55  
56  
57  
58  
59  
60

1  
2  
3  
4  
5 Patients' HRQoL was measured and results suggested that patients with lower  
6 HRQoL tended to prefer new technologies that could have effects on severe or fatal  
7 diseases. The findings on the importance of disease severity regarding patients with  
8 lower HRQoL coincided with URRBMI patients. The reimbursement level and the  
9 hospitalization rate of URRBMI patients were lower than that of UEBMI patients.<sup>15</sup>  
10 Further analysis showed a relatively higher proportion of URRBMI patients with lower  
11 HRQoL. Also, our results have shown that gender is not a decisive factor for the  
12 preference of new technologies for reimbursement.  
13  
14  
15  
16  
17  
18  
19

20 The degree to which respondent preferences were heterogeneous was described by  
21 the estimated SD around each mean preference estimate. Heterogeneity was found  
22 mainly for four variables—expected gains in health outcomes from the treatment,  
23 likelihood of effective treatment, out-of-pocket cost, and fatal disease. Although  
24 heterogeneity existed, the preferences for new technologies with expected gains in  
25 health outcomes from the treatment, and the likelihood of effective treatment remained  
26 significant in all patients and each subgroup, suggesting that such attributes were  
27 generally valued by patients. Variations in preferences over out-of-pocket cost and fatal  
28 disease had implications for the optimal design of insurance reimbursement schemes  
29 and should be analyzed in future studies.  
30  
31  
32  
33  
34  
35  
36  
37  
38  
39

## 40 **Comparison with other studies**

41  
42 Our findings of patients valuing the effectiveness and safety of medical  
43 technologies were consistent with the results by prior studies from other countries  
44 which aimed to investigate patients' preferences for the treatment of chronic  
45 diseases.<sup>45-49</sup> Our study confirmed that new technologies that could increase health  
46 benefits and minimize potential risks were preferred by patients.  
47  
48  
49  
50  
51

52 However, variations in patients' preferences existed and mainly depended on  
53 patients' feelings of the disease. Previous research found that the median hospitalization  
54 cost for patients with hypertension was lower than patients with diabetes,<sup>50 51</sup> which  
55 supported our findings that out-of-pocket cost was not as important for hypertension  
56  
57  
58  
59  
60

1  
2  
3  
4  
5 patients as it was for diabetes patients.

6  
7 We also identified preference heterogeneity among patients with different types of  
8 insurance. Although China's successful health insurance expansion over the past decade  
9 led to the country's universal health insurance coverage, variations in benefit coverage  
10 existed among different health insurance schemes,<sup>12</sup> resulting in disparities in  
11 accessibility and affordability of medical services.<sup>52</sup> Such inequalities affected patients'  
12 preferences across different types of insurance. For example, we found that the  
13 out-of-pocket cost was a significant, negative predictor for URRBMI patients'  
14 preference, but not for all of the UEBMI patients. The finding reflected the fact that,  
15 compared with URRBMI, UEBMI had better benefits and a higher reimbursement level,  
16 especially for those UEBMI patients with extra benefits. The finding also fitted into the  
17 big picture of disparities across insurance schemes in China, as illustrated by prior  
18 research.  
19

20  
21 We found that URRBMI patients attached importance to the severity of the disease.  
22 We also found the association between lower HRQoL and preferences for technologies  
23 treating severe or fatal disease. Previous studies found that chronic disease patients with  
24 URRBMI had lower health service utilization.<sup>53</sup> Furthermore, URRBMI patients had  
25 significantly higher adjusted in-hospital mortality rates and shorter length of stay when  
26 compared with concurrent UEBMI patients.<sup>54 55</sup> These findings suggested that a  
27 plausible explanation for the importance of disease severity for URRBMI patients might  
28 be mainly attributed to their perception of HRQoL and their anxiety about the potential  
29 severe or fatal consequences of chronic diseases.  
30

### 31 32 33 34 35 36 37 38 39 40 41 42 43 44 45 46 47 48 **Implications of the study findings**

49  
50 The rising prevalence of chronic diseases in China has major implications on its  
51 ability to provide timely, acceptable, and affordable healthcare service for its citizens.  
52 To meet the demand for new medical technologies for treating chronic diseases, China's  
53 policy-makers need to consider patients' preferences when deciding on insurance  
54 coverage for new medical technologies. Specifically, our findings that patients favored  
55  
56  
57  
58  
59  
60

1  
2  
3  
4  
5 new medical technologies with substantial health benefits and low risks suggested such  
6 technologies should be the priority of health insurance coverage. We suggest  
7  
8 policy-makers make evidence-based comparisons among technologies according to the  
9  
10 attributes patients preferred.  
11

12 Our findings that out-of-pocket cost was a major concern for URRBMI patients but  
13 not for all UEBMI patients suggested that policy-makers need to make further efforts to  
14 reduce disparities in benefits and reimbursement levels between these two types of  
15 insurance and between UEBMI subgroups. The efforts will not only enhance financial  
16 protections for URRBMI patients and subgroups within UEBMI patients, but will also  
17 contribute to China's long-term goal of equalizing benefits across insurance programs.<sup>10</sup>  
18  
19

20 We found that patients did not care about alternative technologies currently covered  
21 by insurance. However, it is an essential attribute in reimbursement decision-making.  
22 Decision-makers need to compare the new technologies with available alternative  
23 technologies and to determine whether to cover new medical technologies or replace the  
24 alternatives. Policy-makers and clinicians need to implement communication strategies  
25 to improve patients' awareness of the alternative therapies and reimbursement policies  
26 under the current insurance system to increase the appropriate use of the existing  
27 therapies.  
28  
29

### 30 **Strengths and limitations**

31 Our study used DCE to elicit preferences of chronic disease patients on insurance  
32 coverage of new medical technologies in China. We identified preference heterogeneity  
33 among patients with different types of insurance. Patients' HRQoL was measured, and  
34 the potential impact on preferences for reimbursement of new technologies was  
35 analyzed. Our research helped to apply a patient-centered approach to policy-making  
36 and generated evidence that could inform insurance coverage decision-making.  
37  
38

39 Nevertheless, there are several limitations in our study. First, our samples were  
40 taken from tertiary hospitals in Jiangsu Province. Patients receiving medical services  
41 from tertiary hospitals generally have serious and/or complex medical conditions. They  
42  
43  
44  
45  
46  
47  
48  
49  
50  
51  
52  
53  
54  
55  
56  
57  
58  
59  
60

1  
2  
3  
4  
5 have greater demand for healthcare services than other patients and may consider the  
6  
7 issue of medical insurance coverage and reimbursement with caution. Jiangsu is an  
8  
9 eastern, coastal province and one of the most economically developed regions in China.  
10  
11 Future studies are needed to have a nationally representative sample by including  
12  
13 patients at secondary and primary hospitals and, in particular, by including the  
14  
15 economically underdeveloped regions in China.

16  
17 Second, our study included patients with a history of diabetes or hypertension. Due  
18  
19 to differences in nature and characteristics of the disease, the results may not represent  
20  
21 the preferences of patients with other types of chronic diseases. Although prior  
22  
23 DCEs<sup>45-49</sup> made conclusions that were similar to ours in terms of the relative importance  
24  
25 of technology attributes regarding benefits and risks. Future studies need to enroll  
26  
27 patients with other diseases and conduct subgroup analyses to identify variations in  
28  
29 patients' preferences across different types of diseases.

30  
31 Third, there were only 43 UEBMI patients who enjoyed additional benefits of  
32  
33 health insurance, and the limited sample size prevented us from conducting a separate  
34  
35 analysis of this subgroup.  
36  
37  
38

## 39 **CONCLUSION**

40  
41  
42 Chronic disease patients highly valued the health benefits and risks of new  
43  
44 technologies, which are closely linked to their perceptions and feelings. Policy-makers  
45  
46 need to take new technologies with high therapeutic effectiveness and low risks for  
47  
48 treating chronic diseases as a priority for health insurance coverage. More attempts  
49  
50 should be made to reduce the gaps in benefits and reimbursement levels between  
51  
52 insurance schemes to promote equitable access to healthcare services in China.  
53  
54  
55

## 56 **Ethics approval**

57  
58 This study, including the patient consent process, has been approved by the  
59  
60

1  
2  
3  
4  
5 Medical Ethics Committee in Affiliated Hospitals of Nantong University (Ethical  
6 Approval-2016031) and conforms to the ethical guidelines of the Declaration of  
7  
8 Helsinki.  
9

## 10 11 **Acknowledgments**

12  
13 We acknowledge the important contributions made by our interviewers who did  
14 one-to-one, face-to-face interviews with the patients. We are grateful to the patients for  
15 their time and efforts. We sincerely thank reviewers for providing valuable comments  
16 and suggestions on the manuscript.  
17  
18  
19

20  
21 At the time of drafting the manuscript, Jinsong Geng was a fellow at the  
22 Fellowship in Health Policy and Insurance Research, Department of Population  
23 Medicine, Harvard Medical School and Harvard Pilgrim Healthcare Institute.  
24  
25  
26  
27

## 28 29 **Author contributions**

30  
31 Geng JS, Chen XW, and Yu H led the design and analysis of the discrete choice  
32 experiment. Geng JS, Chen XW contributed to the literature search and data  
33 interpretation. Bao HN, Qian DM, Shao YT contributed to implementing the discrete  
34 choice experiment. Geng JS and Yu H performed the statistical analysis and wrote the  
35 manuscript.  
36  
37  
38  
39  
40

## 41 42 **Funding**

43  
44 This work was supported by National Natural Science Foundation of China (Grant  
45 No. 71603138) and Jiangsu Overseas Visiting Scholar Program for University  
46 Prominent Young & Middle-aged Teachers and Presidents.  
47  
48

49  
50 The funders provided financial support for the conduct of the study. The funders  
51 had no role in the design, implementation, data collection and statistical analysis, data  
52 interpretation, or writing of the manuscript.  
53  
54  
55

## 56 57 **Disclosure**

58  
59 The authors report no conflict of interest in this research.  
60

1  
2  
3  
4  
5 **Data sharing statement**  
6

7 Data will be available upon reasonable request to the corresponding author.  
8  
9  
10  
11  
12  
13  
14  
15  
16  
17  
18  
19  
20  
21  
22  
23  
24  
25  
26  
27  
28  
29  
30  
31  
32  
33  
34  
35  
36  
37  
38  
39  
40  
41  
42  
43  
44  
45  
46  
47  
48  
49  
50  
51  
52  
53  
54  
55  
56  
57  
58  
59  
60

For peer review only

## References

1. World Health Organization. *Global action plan for the prevention and control of noncommunicable diseases 2013-2020*. Geneva: World Health Assembly, 2013:5-9.
2. Lu J, Lu Y, Wang X, *et al*. Prevalence, awareness, treatment, and control of hypertension in China: data from 1.7 million adults in a population-based screening study (China PEACE Million Persons Project). *Lancet* 2017;390:2549-58.
3. Wang L, Gao P, Zhang M, *et al*. Prevalence and ethnic pattern of diabetes and prediabetes in China in 2013. *JAMA* 2017;317:2515-23.
4. Adriaanse MC, Drewes HW, van der Heide I, *et al*. The impact of comorbid chronic conditions on quality of life in type 2 diabetes patients. *Qual Life Res* 2016;25:175-82.
5. Aubert CE, Fankhauser N, Marques-Vidal P, *et al*. Patterns of multimorbidity in internal medicine patients in Swiss university hospitals: a multicentre cohort study. *Swiss Med Wkly* 2019;149:w20094.
6. Wang J, Ma JJ, Liu J, *et al*. Prevalence and risk factors of comorbidities among hypertensive patients in China. *Int J Med Sci* 2017;14:201-12.
7. Bloom DE, Chen S, Kuhn M, *et al*. The economic burden of chronic diseases: estimates and projections for China, Japan, and South Korea. *JEoA* 2018:100163.
8. Yip W, Fu H, Chen AT, *et al*. 10 years of health-care reform in China: progress and gaps in Universal Health Coverage. *Lancet* 2019;394:1192-204.
9. China's National Healthcare Security Administration. *China Healthcare Security Diagnosis Related Groups (CHS-DRG)*. Beijing, 2019:44-46.10. Yu H. Universal health insurance coverage for 1.3 billion people: what accounts for China's success? *Health Policy* 2015;119:1145-52.
10. Yu H. Universal health insurance coverage for 1.3 billion people: what accounts for China's success? *Health Policy* 2015;119:1145-52.
11. Li Y, Zhao Y, Yi D, *et al*. Differences exist across insurance schemes in China post-consolidation. *PloS One* 2017;12:e0187100.
12. Xiong X, Zhang Z, Ren J, *et al*. Impact of universal medical insurance system on the accessibility of medical service supply and affordability of patients in China. *PloS One* 2018;13:e0193273.
13. Xian W, Xu X, Li J, *et al*. Health care inequality under different medical insurance schemes in a socioeconomically underdeveloped region of China: a propensity score matching analysis. *BMC Public Health* 2019;19:1373.
14. The State Council of the People's Republic of China. Opinion of the State Council on integrating the basic health insurance system for urban and rural residents, 2016. Available: [http://www.gov.cn/zhengce/content/2016-01/12/content\\_10582.htm](http://www.gov.cn/zhengce/content/2016-01/12/content_10582.htm)
15. China's National Healthcare Security Administration. Statistical Bulletin of National Social Medical Insurance Development in 2018. Available: [http://www.nhsa.gov.cn/art/2019/6/30/art\\_7\\_1477.html](http://www.nhsa.gov.cn/art/2019/6/30/art_7_1477.html)
16. General Office of the State Council of the People's Republic of China. Notice of the General Office of the State Council on transmitting the opinions from the Ministry of Labor and Social Security and the Ministry of Finance on the implementation of medical subsidies for national



1  
2  
3  
4  
5  
6  
7  
8  
9  
10  
11  
12  
13  
14  
15  
16  
17  
18  
19  
20  
21  
22  
23  
24  
25  
26  
27  
28  
29  
30  
31  
32  
33  
34  
35  
36  
37  
38  
39  
40  
41  
42  
43  
44  
45  
46  
47  
48  
49  
50  
51  
52  
53  
54  
55  
56  
57  
58  
59  
60

civil servants, 2000. Available: [http://www.gov.cn/gongbao/content/2000/content\\_60249.htm](http://www.gov.cn/gongbao/content/2000/content_60249.htm)

17. Wuxi No.2 People's Hospital. Medical insurance policy (the latest version of 2020).

Available: <https://www.wx2h.com/ywzc/ywzcdetail/index/id/4/tid/6.html>.

18. Makovski TT, Schmitz S, Zeegers MP, *et al*. Multimorbidity and quality of life: systematic literature review and meta-analysis. *Ageing Res Rev* 2019;53:100903.

19. van Reenen M, Janssen B. *EQ-5D-5L user guide: basic information on how to use the EQ-5D-5L instrument*. Rotterdam: EuroQol Research Foundation, 2015.

20. Pan CW, Sun HP, Zhou HJ, *et al*. Valuing health-related quality of life in type 2 diabetes patients in China. *Med Decis Making* 2016;36:234-41.

21. Wang P, Luo N, Tai ES, *et al*. The EQ-5D-5L is more discriminative than the EQ-5D-3L in patients with diabetes in Singapore. *Value Health Reg Issues* 2016;9:57-62.

22. Liang Z, Zhang T, Lin T, *et al*. Health-related quality of life among rural men and women with hypertension: assessment by the EQ-5D-5L in Jiangsu, China. *Qual Life Res* 2019;28:2069-80.

23. Institute of Medicine Committee on Quality of Health Care in America. *Crossing the quality chasm: a new health system for the 21st century*. Washington, D.C.: The National Academies Press, 2001.

24. Lancsar E, Fiebig DG, Hole AR. Discrete choice experiments: a guide to model specification, estimation and software. *Pharmacoeconomics* 2017;35:697-716.

25. Clark MD, Determann D, Petrou S, *et al*. Discrete choice experiments in health economics: a review of the literature. *Pharmacoeconomics* 2014;32:883-902.

26. Ryan M, Kolstad J, Rockers P, *et al*. *How to conduct a discrete choice experiment for health workforce recruitment and retention in remote and rural areas: a user guide with case studies*. Geneva: World Health Organization Press, 2012.

27. Goetghebuer MM, Wagner M, Houry H, *et al*. Evidence and value: impact on DecisionMaking--the EVIDEM framework and potential applications. *BMC Health Serv Res* 2008;8:270.

28. Chen XW, Chen Q, Geng JS, *et al*. The application of multi-criteria decision analysis in medical insurance reimbursement: a systematic review. *Chinese Health Resources* 2018;21:218-23.

29. Geng JS, Chen XW, Yu XL, *et al*. Study on the evidence-based decision-making framework for reimbursement of new technologies in view of EVIDEM. *Chinese Journal of Health Policy* 2018;11:50-54.

30. Hensher DA, Rose JM, Greene WH. *Applied Choice Analysis (2nd Edition)*. Cambridge: Cambridge University Press, 2015.

31. Reed Johnson F, Lancsar E, Marshall D, *et al*. Constructing experimental designs for discrete-choice experiments: report of the ISPOR Conjoint Analysis Experimental Design Good Research Practices Task Force. *Value Health* 2013;16:3-13.

32. Nichols E, O'Hara NN, Degani Y, *et al*. Patient preferences for nutritional supplementation to improve fracture healing: a discrete choice experiment. *BMJ Open* 2018;8:e019685.

33. van Dijk JD, Groothuis-Oudshoorn CG, Marshall DA, *et al*. An empirical comparison of discrete choice experiment and best-worst scaling to estimate stakeholders' risk tolerance for hip replacement surgery. *Value Health* 2016;19:316-22.

34. Bhattarai N, McMeekin P, Price CI, *et al*. Preferences for centralised emergency medical services: discrete choice experiment. *BMJ Open* 2019;9:e030966.

- 1  
2  
3  
4 35. Kløjgaard ME, Bech M, Søgaard R. Designing a stated choice experiment: the value of a  
5 qualitative process. *J Choice Model* 2012;5:1-18.  
6  
7 36. Dhar R, Simonson I. The Effect of Forced Choice on Choice. *JMR* 2003;40:146-60.  
8  
9 37. de Bekker-Grob EW, Donkers B, Jonker MF, *et al.* Sample size requirements for  
10 discrete-choice experiments in healthcare: a practical guide. *Patient* 2015;8:373-84.  
11  
12 38. Vanniyasingam T, Cunningham CE, Foster G, *et al.* Simulation study to determine the  
13 impact of different design features on design efficiency in discrete choice experiments. *BMJ Open*  
14 2016;6:e011985.  
15  
16 39. Oluboyede Y, Ternent L, Vale L, *et al.* Using a discrete-choice experiment to estimate the  
17 preferences of clinical practitioners for a novel non-invasive device for diagnosis of peripheral  
18 arterial disease in primary care. *Pharmacoecon Open* 2019;3:571-81.  
19  
20 40. Shanahan M, Seddon J, Ritter A, *et al.* Valuing families' preferences for drug treatment: a  
21 discrete choice experiment. *Addiction* 2020;115:690-99.  
22  
23 41. Hauber AB, Gonzalez JM, Groothuis-Oudshoorn CG, *et al.* Statistical methods for the  
24 analysis of discrete choice experiments: a report of the ISPOR Conjoint Analysis Good Research  
25 Practices Task Force. *Value Health* 2016;19:300-15.  
26  
27 42. Kløjgaard ME, Manniche C, Pedersen LB, *et al.* Patient preferences for treatment of low  
28 back pain-a discrete choice experiment. *Value Health* 2014;17:390-6.  
29  
30 43. Luo N, Liu G, Li M, *et al.* Estimating an EQ-5D-5L Value Set for China. *Value Health*  
31 2017;20:662-69.  
32  
33 44. de Bekker-Grob EW, Swait JD, Kassahun HT, *et al.* Are healthcare choices predictable?  
34 The impact of discrete choice experiment designs and models. *Value Health* 2019;22:1050-62.  
35  
36 45. Brockelmann PJ, McMullen S, Wilson JB, *et al.* Patient and physician preferences for  
37 first-line treatment of classical Hodgkin lymphoma in Germany, France and the United Kingdom. *Br*  
38 *J Haematol* 2019;184:202-14.  
39  
40 46. Forsander G, Stallknecht S, Samuelsson U, *et al.* Preferences for treatment among  
41 adolescents with Type 1 diabetes: a national study using a discrete choice experiment model. *Diabet*  
42 *Med* 2018;35:621-29.  
43  
44 47. Havrilesky LJ, Lim S, Ehrisman JA, *et al.* Patient preferences for maintenance PARP  
45 inhibitor therapy in ovarian cancer treatment. *Gynecol Oncol* 2020 doi:  
46 10.1016/j.ygyno.2020.01.026.  
47  
48 48. Ho KA, Acar M, Puig A, *et al.* What do Australian patients with inflammatory arthritis  
49 value in treatment? A discrete choice experiment. *Clin Rheumatol* 2019 doi:  
50 10.1007/s10067-019-04843-4.  
51  
52 49. Thieu VT, Robinson S, Kennedy-Martin T, *et al.* Patient preferences for glucagon-like  
53 peptide 1 receptor-agonist treatment attributes. *Patient Prefer Adherence* 2019;13:561-76.  
54  
55 50. Mutowo MP, Lorgelly PK, Laxy M, *et al.* The hospitalization costs of diabetes and  
56 hypertension complications in Zimbabwe: estimations and correlations. *J Diabetes Res*  
57 2016;2016:9754230.  
58  
59 51. Rosa MQM, Rosa RDS, Correia MG, *et al.* Disease and economic burden of  
60 hospitalizations attributable to diabetes mellitus and its complications: a nationwide study in Brazil.  
*Int J Environ Res Public Health* 2018;15: E294.  
61  
62 52. Zhao C, Wang C, Shen C, *et al.* China's achievements and challenges in improving health

1  
2  
3  
4 insurance coverage. *Drug Discov Ther* 2018;12:1-6.

5 53. Xie X, Wu Q, Hao Y, *et al*. Identifying determinants of socioeconomic inequality in health  
6 service utilization among patients with chronic non-communicable diseases in China. *PloS One*  
7 2014;9:e100231.

8  
9 54. Chen H, Shi L, Xue M, *et al*. Geographic variations in in-hospital mortality and use of  
10 percutaneous coronary intervention following acute myocardial infarction in China: a nationwide  
11 cross-sectional analysis. *J Am Heart Assoc* 2018;7:e008131.

12  
13 55. Lin X, Cai M, Tao H, *et al*. Insurance status, inhospital mortality and length of stay in  
14 hospitalised patients in Shanxi, China: a cross-sectional study. *BMJ Open* 2017;7:e015884.  
15  
16  
17  
18  
19  
20  
21  
22  
23  
24  
25  
26  
27  
28  
29  
30  
31  
32  
33  
34  
35  
36  
37  
38  
39  
40  
41  
42  
43  
44  
45  
46  
47  
48  
49  
50  
51  
52  
53  
54  
55  
56  
57  
58  
59  
60

## Appendix 1: Explanations to attributes and levels

Investigators were required to convey the following definitions to patients:

- ‘Expected gains in health outcomes from the treatment’ suggests that the ideal treatment goals set out in the evidence-based guidelines for individual patients can be achieved; ‘Not as expected’ implies that there can be certain treatment effects, however, the ideal treatment targets cannot be fully achieved. This attribute is the qualitative aspect of effectiveness.
- Likelihood of effective treatment: ‘effective treatment’ equals the attribute ‘gains in health outcomes from the treatment’ in choice sets: a new medical technology that can reach its expected gains in health outcomes is effective. The attribute ‘likelihood of effective treatment’ is the quantitative aspect of effectiveness.
- For the severity of target disease, ‘not severe’ means that the target disease of the new technology is non-fatal and has no impact on patients’ quality of life; ‘severe’ suggests that the target disease of the new technology is non-fatal, however, patients’ quality of life has been significantly reduced; ‘fatal’ means that the target disease of the new technology is fatal and patients are likely to die from the disease.
- For incidence of serious adverse events, ‘often’ is equivalent to or slightly higher than 10%; ‘occasionally’ equals 3%.
- ‘Serious adverse events’ means life-threatening adverse events caused by the new technology, such as severe hypoglycemia, severe hypersensitivity reaction, kidney or liver damage, etc.
- Alternative technologies already reimbursed have similar effectiveness and safety to the new technology (Level: Yes); no alternatives already reimbursed have similar effectiveness and safety to the new technology (Level: No).
- The cost of the technology is the out-of-pocket costs if not reimbursed. The hypothesis is that technology has never been reimbursed unless you make a choice.

**Appendix 2: Examples of DCE choice sets**

Medical technologies A and B are used to treat chronic diseases and currently not been covered by the social insurance reimbursement scheme. If you are forced to make a choice, which technology should be reimbursed by social insurance? There are no right or wrong answers; please make a choice based on your own experience.

| Attributes                                                   | New technology A                                                                                                | New technology B                                                                                              |
|--------------------------------------------------------------|-----------------------------------------------------------------------------------------------------------------|---------------------------------------------------------------------------------------------------------------|
| Expected gains in health outcomes from the treatment         | <br><b>As expected</b>         | <br><b>Not as expected</b> |
| Likelihood of effective treatment                            | <br><b>30%</b>                | <br><b>90%</b>            |
| Severity of target disease                                   | <br><b>Severe, non-fatal</b> | <br><b>Not severe</b>    |
| Incidence of serious adverse events (life-threatening)       | <br><b>Never or rarely</b>   | <br><b>Often</b>         |
| Alternative technologies currently covered by insurance      | <b>Yes</b>                                                                                                      | <b>No</b>                                                                                                     |
| Out-of-pocket cost for new technology (if not reimbursed)    | <b>1500 CNY per month</b>                                                                                       | <b>3500 CNY per month</b>                                                                                     |
| Which one should be covered by health insurance? Your choice | <input type="checkbox"/>                                                                                        | <input type="checkbox"/>                                                                                      |

### Appendix 3: Evaluation of confidence

The following statements reflect how confident you feel when completing the choice sets. Please select your confident level from 0 to 10 and give a tick '√' in the score to represent your selection:

0: not confident at all

10: extremely confident

|   |   |   |   |   |   |   |   |   |   |    |
|---|---|---|---|---|---|---|---|---|---|----|
| 0 | 1 | 2 | 3 | 4 | 5 | 6 | 7 | 8 | 9 | 10 |
|---|---|---|---|---|---|---|---|---|---|----|

  

For peer review only

**Appendix 4: Number of participants in the sampled hospitals**

Supplemental Table 1. Number of participants in the sampled hospitals

| Name of hospital                            | City    | Number of patients |
|---------------------------------------------|---------|--------------------|
| Taizhou People's Hospital                   | Taizhou | 60                 |
| Jiangyin People's Hospital                  | Wuxi    | 40                 |
| First People's Hospital of Wujiang District | Suzhou  | 60                 |
| Nantong First People's Hospital             | Nantong | 23                 |
| Nantong Third People's Hospital             | Nantong | 100                |
| Affiliated Hospital of Nantong University   | Nantong | 125                |

## Appendix 5: Distribution of patients by type of disease and type of insurance

Supplemental Table 2. Types of insurance for patients with hypertension and diabetes

| Disease      | URRBMI | UEBMI |
|--------------|--------|-------|
| Hypertension | 130    | 131   |
| Diabetes     | 49     | 40    |
| Total        | 179    | 171   |

Urban and Rural Residents Basic Medical Insurance (URRBMI); Urban Employees Basic Medical Insurance (UEBMI)

$$\chi^2 = 0.732 \quad P = 0.392$$

Supplemental Table 3. Types of benefits for UEBMI patients with hypertension and diabetes

| Disease      | UEBMI with extra benefits | UEBMI without extra benefits |
|--------------|---------------------------|------------------------------|
| Hypertension | 27                        | 104                          |
| Diabetes     | 11                        | 29                           |
| Total        | 38                        | 133                          |

$$\chi^2 = 0.842 \quad P = 0.359$$



**Appendix 6: Types of chronic commodities for the included patients**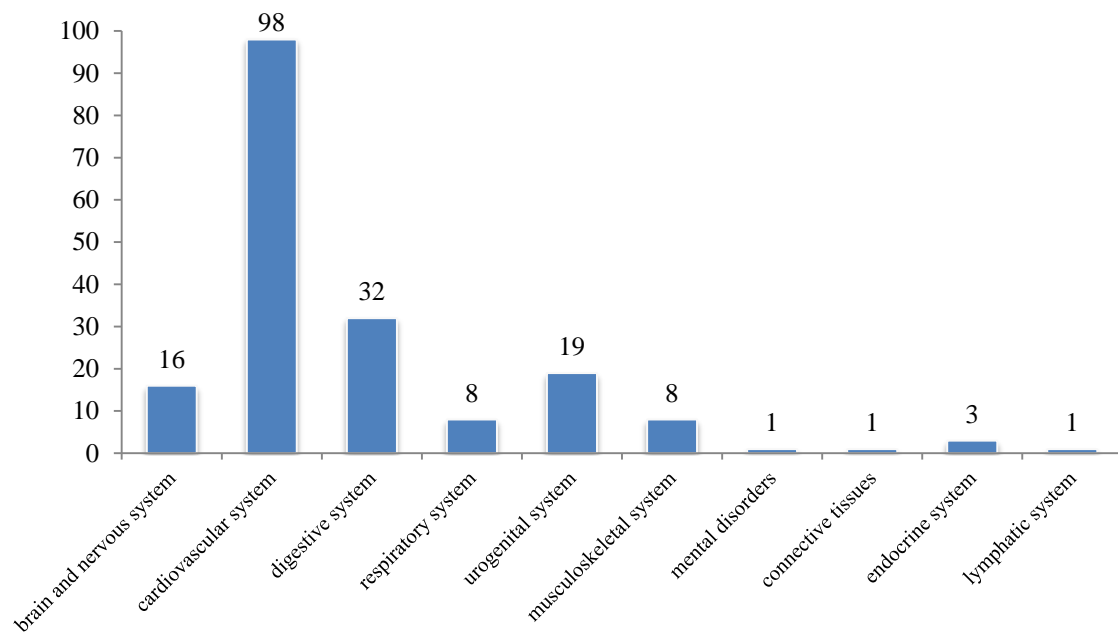

Supplemental Figure 1. Number of patients with chronic commodities

## Appendix 7: Subgroup analysis by type of disease

Supplemental Table 4. Subgroup analysis by type of disease

| Attributes                                              | Hypertension    |                 | Diabetes         |                 |
|---------------------------------------------------------|-----------------|-----------------|------------------|-----------------|
|                                                         | Mean (SE)       | SD (SE)         | Mean (SE)        | SD (SE)         |
| Expected gains in health outcomes from the treatment    |                 |                 |                  |                 |
| <i>Not as expected (reference)</i>                      |                 |                 |                  |                 |
| <i>As expected</i>                                      | 0.716** (0.158) | 0.443(0.496)    | 0.965** (0.259)  | 0.125(0.497)    |
| Likelihood of effective treatment (per 10% increase)    | 0.519** (0.064) | 0.375** (0.086) | 0.420** (0.093)  | 0.401** (0.119) |
| Severity of target disease                              |                 |                 |                  |                 |
| <i>Not severe (reference)</i>                           |                 |                 |                  |                 |
| <i>Severe</i>                                           | 0.328* (0.162)  | 0.056(0.495)    | 0.100(0.273)     | 0.441(0.834)    |
| <i>Fatal</i>                                            | 0.215(0.196)    | 1.189** (0.276) | 0.304(0.311)     | 1.146** (0.395) |
| Incidence of serious adverse events                     |                 |                 |                  |                 |
| <i>Often (reference)</i>                                |                 |                 |                  |                 |
| <i>Occasionally</i>                                     | 0.767** (0.164) | 0.014* (0.381)  | 0.553* (0.266)   | 0.337(0.548)    |
| <i>Never or rarely</i>                                  | 0.995** (0.195) | 1.126(0.271)    | 0.938** (0.349)  | 0.989* (0.459)  |
| Alternative technologies currently covered by insurance |                 |                 |                  |                 |
| <i>Yes (reference)</i>                                  |                 |                 |                  |                 |
| <i>No</i>                                               | 0.152(0.158)    | 0.978** (0.315) | 0.089(0.248)     | 0.019(0.383)    |
| Out-of-pocket costs (thousand CNY per month increase)   | -0.178* (0.084) | 1.024** (0.128) | -0.395** (0.126) | 0.774** (0.190) |
| Log likelihood                                          |                 | -929.220        |                  | -311.029        |
| Participants                                            |                 | 261             |                  | 89              |
| Observations                                            |                 | 2484            |                  | 2412            |

\*P<0.05; \*\*P<0.01; SD: Standard Deviation estimates reflect preference heterogeneity in the participants; SE: Standard Error

Patients who had both hypertension and diabetes were excluded to ensure the homogeneity.

## Appendix 8: Subgroup analysis by type of insurance

Supplemental Table 5. Subgroup analysis by type of insurance

| Attributes                                              | (1)<br>URRBMI patients |                 | (2)<br>UEBMI patients |                 | (3)<br>UEBMI patients without extra<br>insurance benefits <sup>#</sup> |                 |
|---------------------------------------------------------|------------------------|-----------------|-----------------------|-----------------|------------------------------------------------------------------------|-----------------|
|                                                         | Mean (SE)              | SD (SE)         | Mean (SE)             | SD (SE)         | Mean (SE)                                                              | SD (SE)         |
| Expected gains in health outcomes from the treatment    |                        |                 |                       |                 |                                                                        |                 |
| <i>Not as expected (reference)</i>                      |                        |                 |                       |                 |                                                                        |                 |
| <i>As expected</i>                                      | 0.977** (0.204)        | 0.811* (0.325)  | 0.732** (0.166)       | 0.320 (0.641)   | 0.652** (0.193)                                                        | 0.609 (0.420)   |
| Likelihood of effective treatment (per 10% increase)    | 0.512** (0.069)        | 0.384** (0.075) | 0.444** (0.066)       | 0.383** (0.082) | 0.450** (0.074)                                                        | 0.271** (0.085) |
| Severity of target disease                              |                        |                 |                       |                 |                                                                        |                 |
| <i>Not severe (reference)</i>                           |                        |                 |                       |                 |                                                                        |                 |
| <i>Severe</i>                                           | 0.519** (0.189)        | 0.247 (0.887)   | 0.062 (0.171)         | 0.138 (0.609)   | -0.09 (0.194)                                                          | 0.193 (0.615)   |
| <i>Fatal</i>                                            | 0.761** (0.230)        | 1.112** (0.316) | -0.217 (0.211)        | 1.321** (0.289) | -0.385 (0.242)                                                         | 1.387** (0.333) |
| Incidence of serious adverse events                     |                        |                 |                       |                 |                                                                        |                 |
| <i>Often (reference)</i>                                |                        |                 |                       |                 |                                                                        |                 |
| <i>Occasionally</i>                                     | 0.704** (0.181)        | 0.08 (0.389)    | 0.462** (0.165)       | 0.501 (0.401)   | 0.526** (0.196)                                                        | 0.70 (0.381)    |
| <i>Never or rarely</i>                                  | 0.928** (0.214)        | 1.013** (0.301) | 0.876** (0.206)       | 0.881** (0.317) | 0.792** (0.232)                                                        | 0.858* (0.361)  |
| Alternative technologies currently covered by insurance |                        |                 |                       |                 |                                                                        |                 |
| <i>Yes (reference)</i>                                  |                        |                 |                       |                 |                                                                        |                 |
| <i>No</i>                                               | 0.142 (0.161)          | 0.242 (0.516)   | -0.003 (0.148)        | 0.556 (0.380)   | -0.143 (0.158)                                                         | 0.106 (0.679)   |
| Out-of-pocket costs (thousand CNY per month increase)   | -0.511** (0.112)       | 1.041** (0.152) | -0.071 (0.078)        | 0.818** (0.125) | -0.211* (0.090)                                                        | 0.790** (0.146) |
| Log likelihood                                          |                        | -706.268        |                       | -707.710        |                                                                        | -562.183        |
| Participants                                            |                        | 207             |                       | 201             |                                                                        | 158             |
| Observations                                            |                        | 2484            |                       | 2412            |                                                                        | 1896            |

\*P<0.05; \*\*P<0.01; SD: Standard Deviation estimates reflect preference heterogeneity in the participants; SE: Standard Error;

<sup>#</sup>This subgroup did not include those UEBMI patients who enjoyed extra health insurance benefits.

## Appendix 9: Subgroup analysis by health-related quality of life

Supplemental Table 6. Subgroup analysis by health-related quality of life

| Attributes                                              | EQ-5D-5L index value $\leq 0.8$ |                 | EQ-5D-5L index value $> 0.8$ |                 |
|---------------------------------------------------------|---------------------------------|-----------------|------------------------------|-----------------|
|                                                         | Mean (SE)                       | SD (SE)         | Mean (SE)                    | SD (SE)         |
| Expected gains in health outcomes from the treatment    |                                 |                 |                              |                 |
| <i>Not as expected (reference)</i>                      |                                 |                 |                              |                 |
| <i>As expected</i>                                      | 0.554* (0.228)                  | 0.971* (0.423)  | 0.953** (0.165)              | 0.466 (0.493)   |
| Likelihood of effective treatment (per 10% increase)    | 0.606** (0.093)                 | 0.450** (0.098) | 0.405** (0.054)              | 0.320** (0.074) |
| Severity of target disease                              |                                 |                 |                              |                 |
| <i>Not severe (reference)</i>                           |                                 |                 |                              |                 |
| <i>Severe</i>                                           | 0.874** (0.240)                 | 0.043 (0.408)   | 0.106 (0.156)                | 0.349 (0.533)   |
| <i>Fatal</i>                                            | 0.724** (0.254)                 | 0.773* (0.347)  | -0.064 (0.195)               | 1.499** (0.281) |
| Incidence of serious adverse events                     |                                 |                 |                              |                 |
| <i>Often (reference)</i>                                |                                 |                 |                              |                 |
| <i>Occasionally</i>                                     | 0.131 (0.202)                   | 0.007* (0.461)  | 0.815** (0.166)              | 0.431 (0.357)   |
| <i>Never or rarely</i>                                  | 0.516* (0.236)                  | 0.453 (0.519)   | 1.120** (0.200)              | 1.103** (0.275) |
| Alternative technologies currently covered by insurance |                                 |                 |                              |                 |
| <i>Yes (reference)</i>                                  |                                 |                 |                              |                 |
| <i>No</i>                                               | 0.007 (0.179)                   | 0.142 (0.466)   | -0.093 (0.140)               | 0.560 (0.458)   |
| Out-of-pocket costs (thousand CNY per month increase)   | -0.233* (0.109)                 | 0.909** (0.157) | -0.283** (0.083)             | 0.979** (0.135) |
| Log likelihood                                          |                                 | -438.402        |                              | -954.540        |
| Participants                                            |                                 | 127             |                              | 281             |
| Observations                                            |                                 | 1524            |                              | 3372            |

\*P<0.05; \*\*P<0.01; SD: Standard Deviation estimates reflect preference heterogeneity in the participants; SE: Standard Error

**Appendix 10: Patients' health-related quality of life by type of insurance**

Supplemental Table 7. Patients' health-related quality of life by type of insurance

| Type of insurance | EQ-5D-5L index value $\leq 0.8$ | EQ-5D-5L index value $> 0.8$ |
|-------------------|---------------------------------|------------------------------|
| URRBMI            | 90                              | 117                          |
| UEBMI             | 37                              | 164                          |
| Total             | 127                             | 281                          |

 $\chi^2 = 29.898$  P=0.000

Appendix 11: Subgroup analysis by gender

Supplemental Table 8. Subgroup analysis by gender

| Attributes                                              | Male             |                 | Female           |                 |
|---------------------------------------------------------|------------------|-----------------|------------------|-----------------|
|                                                         | Mean (SE)        | SD (SE)         | Mean (SE)        | SD (SE)         |
| Expected gains in health outcomes from the treatment    |                  |                 |                  |                 |
| <i>Not as expected (reference)</i>                      |                  |                 |                  |                 |
| <i>As expected</i>                                      | 0.805** (0.174)  | 0.754* (0.357)  | 0.921** (0.200)  | 0.193(0.512)    |
| Likelihood of effective treatment (per 10% increase)    | 0.476** (0.065)  | 0.409** (0.077) | 0.456** (0.069)  | 0.362** (0.089) |
| Severity of target disease                              |                  |                 |                  |                 |
| <i>Not severe (reference)</i>                           |                  |                 |                  |                 |
| <i>Severe</i>                                           | 0.303(0.177)     | 0.541(0.425)    | 0.346(0.191)     | 0.333(0.435)    |
| <i>Fatal</i>                                            | 0.249(0.199)     | 1.077** (0.282) | 0.182(0.241)     | 1.582** (0.319) |
| Incidence of serious adverse events                     |                  |                 |                  |                 |
| <i>Often (reference)</i>                                |                  |                 |                  |                 |
| <i>Occasionally</i>                                     | 0.680** (0.167)  | 0.471(0.371)    | 0.528** (0.187)  | 0.007(0.417)    |
| <i>Never or rarely</i>                                  | 0.953** (0.204)  | 0.768*(0.338)   | 0.897** (0.232)  | 1.146** (0.306) |
| Alternative technologies currently covered by insurance |                  |                 |                  |                 |
| <i>Yes (reference)</i>                                  |                  |                 |                  |                 |
| <i>No</i>                                               | 0.127(0.144)     | 0.288(0.650)    | 0.093(0.168)     | 0.202(0.643)    |
| Out-of-pocket costs (thousand CNY per month increase)   | -0.246** (0.084) | 0.893** (0.131) | -0.281** (0.098) | 0.979** (0.153) |
| Log likelihood                                          |                  | -780.85         |                  | -667.657        |
| Participants                                            |                  | 220             |                  | 188             |
| Observations                                            |                  | 2640            |                  | 2256            |

\*P<0.05; \*\*P<0.01; SD: Standard Deviation estimates reflect preference heterogeneity in the participants; SE: Standard Error

**STROBE 2007 (v4) checklist of items to be included in reports of observational studies in epidemiology\***  
**Checklist for cohort, case-control, and cross-sectional studies (combined)**

| Section/Topic             | Item # | Recommendation                                                                                                                                                                                                                                                                                                                                                                                                                                                         | Reported on page #                           |
|---------------------------|--------|------------------------------------------------------------------------------------------------------------------------------------------------------------------------------------------------------------------------------------------------------------------------------------------------------------------------------------------------------------------------------------------------------------------------------------------------------------------------|----------------------------------------------|
| Title and abstract        | 1      | (a) Indicate the study's design with a commonly used term in the title or the abstract                                                                                                                                                                                                                                                                                                                                                                                 | Page 2                                       |
|                           |        | (b) Provide in the abstract an informative and balanced summary of what was done and what was found                                                                                                                                                                                                                                                                                                                                                                    | Page 3-4                                     |
| <b>Introduction</b>       |        |                                                                                                                                                                                                                                                                                                                                                                                                                                                                        |                                              |
| Background/rationale      | 2      | Explain the scientific background and rationale for the investigation being reported                                                                                                                                                                                                                                                                                                                                                                                   | Page 6-8                                     |
| Objectives                | 3      | State specific objectives, including any pre-specified hypotheses                                                                                                                                                                                                                                                                                                                                                                                                      | Page 8 (line 47-54)                          |
| <b>Methods</b>            |        |                                                                                                                                                                                                                                                                                                                                                                                                                                                                        |                                              |
| Study design              | 4      | Present key elements of study design early in the paper                                                                                                                                                                                                                                                                                                                                                                                                                | Page 9 (line 11-20)                          |
| Setting                   | 5      | Describe the setting, locations, and relevant dates, including periods of recruitment, exposure, follow-up, and data collection                                                                                                                                                                                                                                                                                                                                        | Page 9-12                                    |
| Participants              | 6      | (a) <i>Cohort study</i> —Give the eligibility criteria, and the sources and methods of selection of participants. Describe methods of follow-up<br><i>Case-control study</i> —Give the eligibility criteria, and the sources and methods of case ascertainment and control selection. Give the rationale for the choice of cases and controls<br><i>Cross-sectional study</i> —Give the eligibility criteria, and the sources and methods of selection of participants | Page 12 (line 30-46)                         |
|                           |        | (b) <i>Cohort study</i> —For matched studies, give matching criteria and number of exposed and unexposed<br><i>Case-control study</i> —For matched studies, give matching criteria and the number of controls per case                                                                                                                                                                                                                                                 | Not applicable                               |
| Variables                 | 7      | Clearly define all outcomes, exposures, predictors, potential confounders, and effect modifiers. Give diagnostic criteria, if applicable                                                                                                                                                                                                                                                                                                                               | Page 10 (line 34-44);<br>Page 11 (line 5-24) |
| Data sources/ measurement | 8*     | For each variable of interest, give sources of data and details of methods of assessment (measurement). Describe comparability of assessment methods if there is more than one group                                                                                                                                                                                                                                                                                   | Page 13                                      |
| Bias                      | 9      | Describe any efforts to address potential sources of bias                                                                                                                                                                                                                                                                                                                                                                                                              | Page 13 (line 5-22)                          |
| Study size                | 10     | Explain how the study size was arrived at                                                                                                                                                                                                                                                                                                                                                                                                                              | Page 12 (line 47-58)                         |
| Quantitative variables    | 11     | Explain how quantitative variables were handled in the analyses. If applicable, describe which groupings were chosen and why                                                                                                                                                                                                                                                                                                                                           | Page 14 (line 31-50)                         |
| Statistical methods       | 12     | (a) Describe all statistical methods, including those used to control for confounding                                                                                                                                                                                                                                                                                                                                                                                  | Page 14 (line 12-29)                         |
|                           |        | (b) Describe any methods used to examine subgroups and interactions                                                                                                                                                                                                                                                                                                                                                                                                    | Page 14 (line 50-53)                         |
|                           |        | (c) Explain how missing data were addressed                                                                                                                                                                                                                                                                                                                                                                                                                            | Page 13 (line 15-19)                         |
|                           |        | (d) <i>Cohort study</i> —If applicable, explain how loss to follow-up was addressed<br><i>Case-control study</i> —If applicable, explain how matching of cases and controls was addressed                                                                                                                                                                                                                                                                              | Not applicable                               |

|                          |     |                                                                                                                                                                                                              |                                                                   |
|--------------------------|-----|--------------------------------------------------------------------------------------------------------------------------------------------------------------------------------------------------------------|-------------------------------------------------------------------|
|                          |     | <i>Cross-sectional study</i> —If applicable, describe analytical methods taking account of sampling strategy                                                                                                 |                                                                   |
|                          |     | (e) Describe any sensitivity analyses                                                                                                                                                                        | Page 15 (line 33-39)                                              |
| <b>Results</b>           |     |                                                                                                                                                                                                              |                                                                   |
| Participants             | 13* | (a) Report numbers of individuals at each stage of study—eg numbers potentially eligible, examined for eligibility, confirmed eligible, included in the study, completing follow-up, and analysed            | Page 15 (line 11-21)                                              |
|                          |     | (b) Give reasons for non-participation at each stage                                                                                                                                                         | Not applicable                                                    |
|                          |     | (c) Consider use of a flow diagram                                                                                                                                                                           | Not applicable                                                    |
| Descriptive data         | 14* | (a) Give characteristics of study participants (eg demographic, clinical, social) and information on exposures and potential confounders                                                                     | Page 15 (line 23-43);<br>Page 16                                  |
|                          |     | (b) Indicate number of participants with missing data for each variable of interest                                                                                                                          | Not applicable                                                    |
|                          |     | (c) <i>Cohort study</i> —Summarise follow-up time (eg, average and total amount)                                                                                                                             | Not applicable                                                    |
| Outcome data             | 15* | <i>Cohort study</i> —Report numbers of outcome events or summary measures over time                                                                                                                          |                                                                   |
|                          |     | <i>Case-control study</i> —Report numbers in each exposure category, or summary measures of exposure                                                                                                         |                                                                   |
|                          |     | <i>Cross-sectional study</i> —Report numbers of outcome events or summary measures                                                                                                                           | Page 17 (line 16-36)                                              |
| Main results             | 16  | (a) Give unadjusted estimates and, if applicable, confounder-adjusted estimates and their precision (eg, 95% confidence interval). Make clear which confounders were adjusted for and why they were included | Page 15 (line 33-39);<br>Page 19 (line 48-54)                     |
|                          |     | (b) Report category boundaries when continuous variables were categorized                                                                                                                                    | Not applicable                                                    |
|                          |     | (c) If relevant, consider translating estimates of relative risk into absolute risk for a meaningful time period                                                                                             | Not applicable                                                    |
| Other analyses           | 17  | Report other analyses done—eg analyses of subgroups and interactions, and sensitivity analyses                                                                                                               | Page 17 (line 38-58);<br>Page 18; Page 19;<br>Page 20 (line 5-11) |
| <b>Discussion</b>        |     |                                                                                                                                                                                                              |                                                                   |
| Key results              | 18  | Summarise key results with reference to study objectives                                                                                                                                                     | Page 20 (line 19-58)                                              |
| Limitations              | 19  | Discuss limitations of the study, taking into account sources of potential bias or imprecision. Discuss both direction and magnitude of any potential bias                                                   | Page 23 (line 40-59);<br>Page 24 (line 5-35)                      |
| Interpretation           | 20  | Give a cautious overall interpretation of results considering objectives, limitations, multiplicity of analyses, results from similar studies, and other relevant evidence                                   | Page 21 (line 40-59);<br>Page 22 (line 5-46)                      |
| Generalisability         | 21  | Discuss the generalisability (external validity) of the study results                                                                                                                                        | Page 22 (line 48-59);<br>Page 23 (line 5-38)                      |
| <b>Other information</b> |     |                                                                                                                                                                                                              |                                                                   |
| Funding                  | 22  | Give the source of funding and the role of the funders for the present study and, if applicable, for the original study on which the present article is based                                                | Page 25 (line 41-54)                                              |



1  
2  
3 \*Give information separately for cases and controls in case-control studies and, if applicable, for exposed and unexposed groups in cohort and cross-sectional studies.

4 **Note:** An Explanation and Elaboration article discusses each checklist item and gives methodological background and published examples of transparent reporting. The STROBE  
5 checklist is best used in conjunction with this article (freely available on the Web sites of PLoS Medicine at <http://www.plosmedicine.org/>, Annals of Internal Medicine at  
6 <http://www.annals.org/>, and Epidemiology at <http://www.epidem.com/>). Information on the STROBE Initiative is available at [www.strobe-statement.org](http://www.strobe-statement.org).  
7  
8  
9  
10  
11  
12  
13  
14  
15  
16  
17  
18  
19  
20  
21  
22  
23  
24  
25  
26  
27  
28  
29  
30  
31  
32  
33  
34  
35  
36  
37  
38  
39  
40  
41  
42  
43  
44  
45  
46

For peer review only
