# Supplementary material for: Patients’ preferences for health insurance coverage of new technologies for treating chronic diseases in China: a discrete choice experiment
Source: PubMed Central journal article supplement — BMJ Open. 2020 Sep 23;10(9):e038051. doi: 10.1136/bmjopen-2020-038051 (PMC7513632; doi:10.1136/bmjopen-2020-038051), 2020-09-23
Supplement: bmjopen-2020-038051supp001.pdf [file bmjopen-2020-038051supp001.pdf]

## Appendix 1: Explanations to attributes and levels

Investigators were required to convey the following definitions to patients:

- ‘Expected gains in health outcomes from the treatment’ suggests that the ideal treatment goals set out in the evidence-based guidelines for individual patients can be achieved; ‘Not as expected’ implies that there can be certain treatment effects, however, the ideal treatment targets cannot be fully achieved. This attribute is the qualitative aspect of effectiveness.
- Likelihood of effective treatment: ‘effective treatment’ equals the attribute ‘gains in health outcomes from the treatment’ in choice sets: a new medical technology that can reach its expected gains in health outcomes is effective. The attribute ‘likelihood of effective treatment’ is the quantitative aspect of effectiveness.
- For the severity of target disease, ‘not severe’ means that the target disease of the new technology is non-fatal and has no impact on patients’ quality of life; ‘severe’ suggests that the target disease of the new technology is non-fatal, however, patients’ quality of life has been significantly reduced; ‘fatal’ means that the target disease of the new technology is fatal and patients are likely to die from the disease.
- For incidence of serious adverse events, ‘often’ is equivalent to or slightly higher than 10%; ‘occasionally’ equals 3%.
- ‘Serious adverse events’ means life-threatening adverse events caused by the new technology, such as severe hypoglycemia, severe hypersensitivity reaction, kidney or liver damage, etc.
- Alternative technologies already reimbursed have similar effectiveness and safety to the new technology (Level: Yes); no alternatives already reimbursed have similar effectiveness and safety to the new technology (Level: No).
- The cost of the technology is the out-of-pocket costs if not reimbursed. The hypothesis is that technology has never been reimbursed unless you make a choice.

## Appendix 2: Examples of DCE choice sets

Medical technologies A and B are used to treat chronic diseases and currently not been covered by the social insurance reimbursement scheme. If you are forced to make a choice, which technology should be reimbursed by social insurance? There are no right or wrong answers; please make a choice based on your own experience.

| Attributes                                                   | New technology A                                                                                                    | New technology B                                                                                                  |
|--------------------------------------------------------------|---------------------------------------------------------------------------------------------------------------------|-------------------------------------------------------------------------------------------------------------------|
| Expected gains in health outcomes from the treatment         |  <p><b>As expected</b></p>         |  <p><b>Not as expected</b></p> |
| Likelihood of effective treatment                            |  <p><b>30%</b></p>                |  <p><b>90%</b></p>             |
| Severity of target disease                                   |  <p><b>Severe, non-fatal</b></p> |  <p><b>Not severe</b></p>    |
| Incidence of serious adverse events (life-threatening)       |  <p><b>Never or rarely</b></p>   |  <p><b>Often</b></p>          |
| Alternative technologies currently covered by insurance      | <b>Yes</b>                                                                                                          | <b>No</b>                                                                                                         |
| Out-of-pocket cost for new technology (if not reimbursed)    | <b>1500 CNY per month</b>                                                                                           | <b>3500 CNY per month</b>                                                                                         |
| Which one should be covered by health insurance? Your choice | <input type="checkbox"/>                                                                                            | <input type="checkbox"/>                                                                                          |

### Appendix 3: Evaluation of confidence

The following statements reflect how confident you feel when completing the choice sets. Please select your confident level from 0 to 10 and give a tick '✓' in the score to represent your selection:

0: not confident at all

10: extremely confident

|   |   |   |   |   |   |   |   |   |   |    |
|---|---|---|---|---|---|---|---|---|---|----|
| 0 | 1 | 2 | 3 | 4 | 5 | 6 | 7 | 8 | 9 | 10 |
|---|---|---|---|---|---|---|---|---|---|----|

  

**Appendix 4: Number of participants in the sampled hospitals**

Supplemental Table 1. Number of participants in the sampled hospitals

| Name of hospital                            | City    | Number of patients |
|---------------------------------------------|---------|--------------------|
| Taizhou People's Hospital                   | Taizhou | 60                 |
| Jiangyin People's Hospital                  | Wuxi    | 40                 |
| First People's Hospital of Wujiang District | Suzhou  | 60                 |
| Nantong First People's Hospital             | Nantong | 23                 |
| Nantong Third People's Hospital             | Nantong | 100                |
| Affiliated Hospital of Nantong University   | Nantong | 125                |

**Appendix 5: Distribution of patients by type of disease and type of insurance**

Supplemental Table 2. Types of insurance for patients with hypertension and diabetes

| Disease      | URRBMI | UEBMI |
|--------------|--------|-------|
| Hypertension | 130    | 131   |
| Diabetes     | 49     | 40    |
| Total        | 179    | 171   |

Urban and Rural Residents Basic Medical Insurance (URRBMI); Urban Employees Basic Medical Insurance (UEBMI)

$$\chi^2 = 0.732 \quad P = 0.392$$

Supplemental Table 3. Types of benefits for UEBMI patients with hypertension and diabetes

| Disease      | UEBMI with extra benefits | UEBMI without extra benefits |
|--------------|---------------------------|------------------------------|
| Hypertension | 27                        | 104                          |
| Diabetes     | 11                        | 29                           |
| Total        | 38                        | 133                          |

$$\chi^2 = 0.842 \quad P = 0.359$$

**Appendix 6: Types of chronic commodities for the included patients**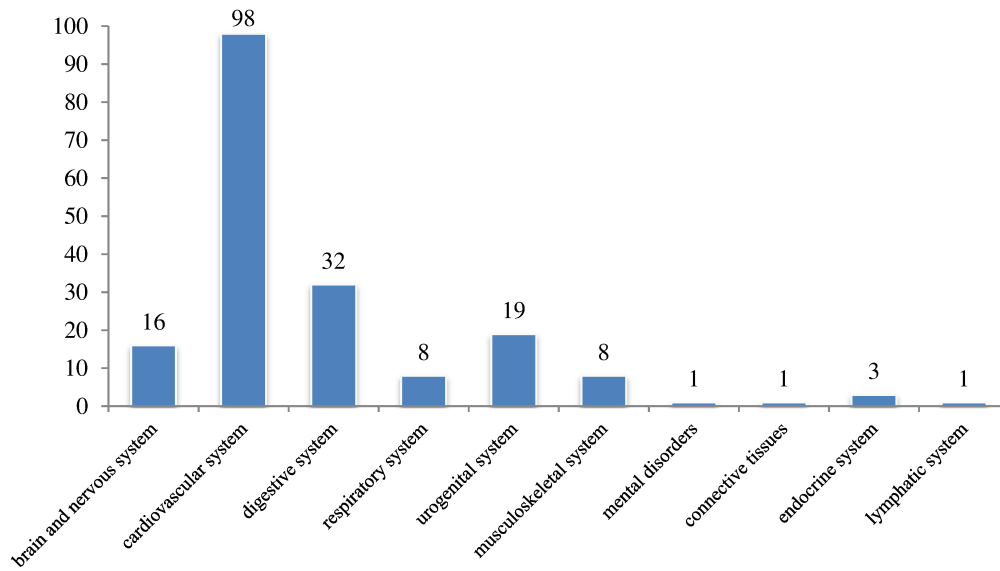

Supplemental Figure 1. Number of patients with chronic commodities

## Appendix 7: Subgroup analysis by type of disease

Supplemental Table 4. Subgroup analysis by type of disease

| Attributes                                              | Hypertension    |                 | Diabetes         |                 |
|---------------------------------------------------------|-----------------|-----------------|------------------|-----------------|
|                                                         | Mean (SE)       | SD (SE)         | Mean (SE)        | SD (SE)         |
| Expected gains in health outcomes from the treatment    |                 |                 |                  |                 |
| <i>Not as expected (reference)</i>                      |                 |                 |                  |                 |
| <i>As expected</i>                                      | 0.716** (0.158) | 0.443(0.496)    | 0.965** (0.259)  | 0.125(0.497)    |
| Likelihood of effective treatment (per 10% increase)    | 0.519** (0.064) | 0.375** (0.086) | 0.420** (0.093)  | 0.401** (0.119) |
| Severity of target disease                              |                 |                 |                  |                 |
| <i>Not severe (reference)</i>                           |                 |                 |                  |                 |
| <i>Severe</i>                                           | 0.328* (0.162)  | 0.056(0.495)    | 0.100(0.273)     | 0.441(0.834)    |
| <i>Fatal</i>                                            | 0.215(0.196)    | 1.189** (0.276) | 0.304(0.311)     | 1.146** (0.395) |
| Incidence of serious adverse events                     |                 |                 |                  |                 |
| <i>Often (reference)</i>                                |                 |                 |                  |                 |
| <i>Occasionally</i>                                     | 0.767** (0.164) | 0.014* (0.381)  | 0.553* (0.266)   | 0.337(0.548)    |
| <i>Never or rarely</i>                                  | 0.995** (0.195) | 1.126(0.271)    | 0.938** (0.349)  | 0.989* (0.459)  |
| Alternative technologies currently covered by insurance |                 |                 |                  |                 |
| <i>Yes (reference)</i>                                  |                 |                 |                  |                 |
| <i>No</i>                                               | 0.152(0.158)    | 0.978** (0.315) | 0.089(0.248)     | 0.019(0.383)    |
| Out-of-pocket costs (thousand CNY per month increase)   | -0.178* (0.084) | 1.024** (0.128) | -0.395** (0.126) | 0.774** (0.190) |
| Log likelihood                                          |                 | -929.220        |                  | -311.029        |
| Participants                                            |                 | 261             |                  | 89              |
| Observations                                            |                 | 2484            |                  | 2412            |

\*P<0.05; \*\*P<0.01; SD: Standard Deviation estimates reflect preference heterogeneity in the participants; SE: Standard Error

Patients who had both hypertension and diabetes were excluded to ensure the homogeneity.

**Appendix 8: Subgroup analysis by type of insurance**

Supplemental Table 5. Subgroup analysis by type of insurance

| Attributes                                              | (1)<br>URRBMI patients |                 | (2)<br>UEBMI patients |                 | (3)<br>UEBMI patients without extra<br>insurance benefits <sup>#</sup> |                 |
|---------------------------------------------------------|------------------------|-----------------|-----------------------|-----------------|------------------------------------------------------------------------|-----------------|
|                                                         | Mean (SE)              | SD (SE)         | Mean (SE)             | SD (SE)         | Mean (SE)                                                              | SD (SE)         |
| Expected gains in health outcomes from the treatment    |                        |                 |                       |                 |                                                                        |                 |
| <i>Not as expected (reference)</i>                      |                        |                 |                       |                 |                                                                        |                 |
| <i>As expected</i>                                      | 0.977** (0.204)        | 0.811* (0.325)  | 0.732** (0.166)       | 0.320(0.641)    | 0.652** (0.193)                                                        | 0.609(0.420)    |
| Likelihood of effective treatment (per 10% increase)    | 0.512** (0.069)        | 0.384** (0.075) | 0.444** (0.066)       | 0.383** (0.082) | 0.450** (0.074)                                                        | 0.271** (0.085) |
| Severity of target disease                              |                        |                 |                       |                 |                                                                        |                 |
| <i>Not severe (reference)</i>                           |                        |                 |                       |                 |                                                                        |                 |
| <i>Severe</i>                                           | 0.519** (0.189)        | 0.247(0.887)    | 0.062(0.171)          | 0.138(0.609)    | -0.09(0.194)                                                           | 0.193(0.615)    |
| <i>Fatal</i>                                            | 0.761** (0.230)        | 1.112** (0.316) | -0.217(0.211)         | 1.321** (0.289) | -0.385(0.242)                                                          | 1.387** (0.333) |
| Incidence of serious adverse events                     |                        |                 |                       |                 |                                                                        |                 |
| <i>Often (reference)</i>                                |                        |                 |                       |                 |                                                                        |                 |
| <i>Occasionally</i>                                     | 0.704** (0.181)        | 0.088(0.389)    | 0.462** (0.165)       | 0.501(0.401)    | 0.526** (0.196)                                                        | 0.707(0.381)    |
| <i>Never or rarely</i>                                  | 0.928** (0.214)        | 1.013** (0.301) | 0.876** (0.206)       | 0.881** (0.317) | 0.792** (0.232)                                                        | 0.858* (0.361)  |
| Alternative technologies currently covered by insurance |                        |                 |                       |                 |                                                                        |                 |
| <i>Yes (reference)</i>                                  |                        |                 |                       |                 |                                                                        |                 |
| <i>No</i>                                               | 0.142(0.161)           | 0.242(0.516)    | -0.003(0.148)         | 0.556(0.380)    | -0.143(0.158)                                                          | 0.106(0.679)    |
| Out-of-pocket costs (thousand CNY per month increase)   | -0.511** (0.112)       | 1.041** (0.152) | -0.071(0.078)         | 0.818** (0.125) | -0.211* (0.090)                                                        | 0.790** (0.146) |
| Log likelihood                                          |                        | -706.268        |                       | -707.710        |                                                                        | -562.183        |
| Participants                                            |                        | 207             |                       | 201             |                                                                        | 158             |
| Observations                                            |                        | 2484            |                       | 2412            |                                                                        | 1896            |

\*P<0.05; \*\*P<0.01; SD: Standard Deviation estimates reflect preference heterogeneity in the participants; SE: Standard Error;

<sup>#</sup>This subgroup did not include those UEBMI patients who enjoyed extra health insurance benefits.



## Appendix 9: Subgroup analysis by health-related quality of life

Supplemental Table 6. Subgroup analysis by health-related quality of life

| Attributes                                              | EQ-5D-5L index value $\leq 0.8$ |                 | EQ-5D-5L index value $> 0.8$ |                 |
|---------------------------------------------------------|---------------------------------|-----------------|------------------------------|-----------------|
|                                                         | Mean (SE)                       | SD (SE)         | Mean (SE)                    | SD (SE)         |
| Expected gains in health outcomes from the treatment    |                                 |                 |                              |                 |
| <i>Not as expected (reference)</i>                      |                                 |                 |                              |                 |
| <i>As expected</i>                                      | 0.554* (0.228)                  | 0.971* (0.423)  | 0.953** (0.165)              | 0.466 (0.493)   |
| Likelihood of effective treatment (per 10% increase)    | 0.606** (0.093)                 | 0.450** (0.098) | 0.405** (0.054)              | 0.320** (0.074) |
| Severity of target disease                              |                                 |                 |                              |                 |
| <i>Not severe (reference)</i>                           |                                 |                 |                              |                 |
| <i>Severe</i>                                           | 0.874** (0.240)                 | 0.043 (0.408)   | 0.106 (0.156)                | 0.349 (0.533)   |
| <i>Fatal</i>                                            | 0.724** (0.254)                 | 0.773* (0.347)  | -0.064 (0.195)               | 1.499** (0.281) |
| Incidence of serious adverse events                     |                                 |                 |                              |                 |
| <i>Often (reference)</i>                                |                                 |                 |                              |                 |
| <i>Occasionally</i>                                     | 0.131 (0.202)                   | 0.007* (0.461)  | 0.815** (0.166)              | 0.431 (0.357)   |
| <i>Never or rarely</i>                                  | 0.516* (0.236)                  | 0.453 (0.519)   | 1.120** (0.200)              | 1.103** (0.275) |
| Alternative technologies currently covered by insurance |                                 |                 |                              |                 |
| <i>Yes (reference)</i>                                  |                                 |                 |                              |                 |
| <i>No</i>                                               | 0.007 (0.179)                   | 0.142 (0.466)   | 0.093 (0.140)                | 0.560 (0.458)   |
| Out-of-pocket costs (thousand CNY per month increase)   | -0.233* (0.109)                 | 0.909** (0.157) | -0.283** (0.083)             | 0.979** (0.135) |
| Log likelihood                                          |                                 | -438.402        |                              | -954.540        |
| Participants                                            |                                 | 127             |                              | 281             |
| Observations                                            |                                 | 1524            |                              | 3372            |

\*P<0.05; \*\*P<0.01; SD: Standard Deviation estimates reflect preference heterogeneity in the participants; SE: Standard Error

**Appendix 10: Patients' health-related quality of life by type of insurance**

Supplemental Table 7. Patients' health-related quality of life by type of insurance

| Type of insurance | EQ-5D-5L index value $\leq 0.8$ | EQ-5D-5L index value $> 0.8$ |
|-------------------|---------------------------------|------------------------------|
| URRBMI            | 90                              | 117                          |
| UEBMI             | 37                              | 164                          |
| Total             | 127                             | 281                          |

 $\chi^2 = 29.898$  P=0.000

## Appendix 11: Subgroup analysis by gender

Supplemental Table 8. Subgroup analysis by gender

| Attributes                                              | Male             |                 | Female           |                 |
|---------------------------------------------------------|------------------|-----------------|------------------|-----------------|
|                                                         | Mean (SE)        | SD (SE)         | Mean (SE)        | SD (SE)         |
| Expected gains in health outcomes from the treatment    |                  |                 |                  |                 |
| <i>Not as expected (reference)</i>                      |                  |                 |                  |                 |
| <i>As expected</i>                                      | 0.805** (0.174)  | 0.754* (0.357)  | 0.921** (0.200)  | 0.193 (0.512)   |
| Likelihood of effective treatment (per 10% increase)    | 0.476** (0.065)  | 0.409** (0.077) | 0.456** (0.069)  | 0.362** (0.089) |
| Severity of target disease                              |                  |                 |                  |                 |
| <i>Not severe (reference)</i>                           |                  |                 |                  |                 |
| <i>Severe</i>                                           | 0.303 (0.177)    | 0.541 (0.425)   | 0.346 (0.191)    | 0.333 (0.435)   |
| <i>Fatal</i>                                            | 0.249 (0.199)    | 1.077** (0.282) | 0.182 (0.241)    | 1.582** (0.319) |
| Incidence of serious adverse events                     |                  |                 |                  |                 |
| <i>Often (reference)</i>                                |                  |                 |                  |                 |
| <i>Occasionally</i>                                     | 0.680** (0.167)  | 0.471 (0.371)   | 0.528** (0.187)  | 0.007 (0.417)   |
| <i>Never or rarely</i>                                  | 0.953** (0.204)  | 0.768* (0.338)  | 0.897** (0.232)  | 1.146** (0.306) |
| Alternative technologies currently covered by insurance |                  |                 |                  |                 |
| <i>Yes (reference)</i>                                  |                  |                 |                  |                 |
| <i>No</i>                                               | 0.127 (0.144)    | 0.288 (0.650)   | 0.093 (0.168)    | 0.202 (0.643)   |
| Out-of-pocket costs (thousand CNY per month increase)   | -0.246** (0.084) | 0.893** (0.131) | -0.281** (0.098) | 0.979** (0.153) |
| Log likelihood                                          |                  | -780.85         |                  | -667.657        |
| Participants                                            |                  | 220             |                  | 188             |
| Observations                                            |                  | 2640            |                  | 2256            |

\*P<0.05; \*\*P<0.01; SD: Standard Deviation estimates reflect preference heterogeneity in the participants; SE: Standard Error
